# Supplementary material
Source: publisher figshare collection journal article supplement (https://gsapubs.figshare.com/articles/dataset/_/12534824)
Supplement: Supplementary file 1 [file 1]

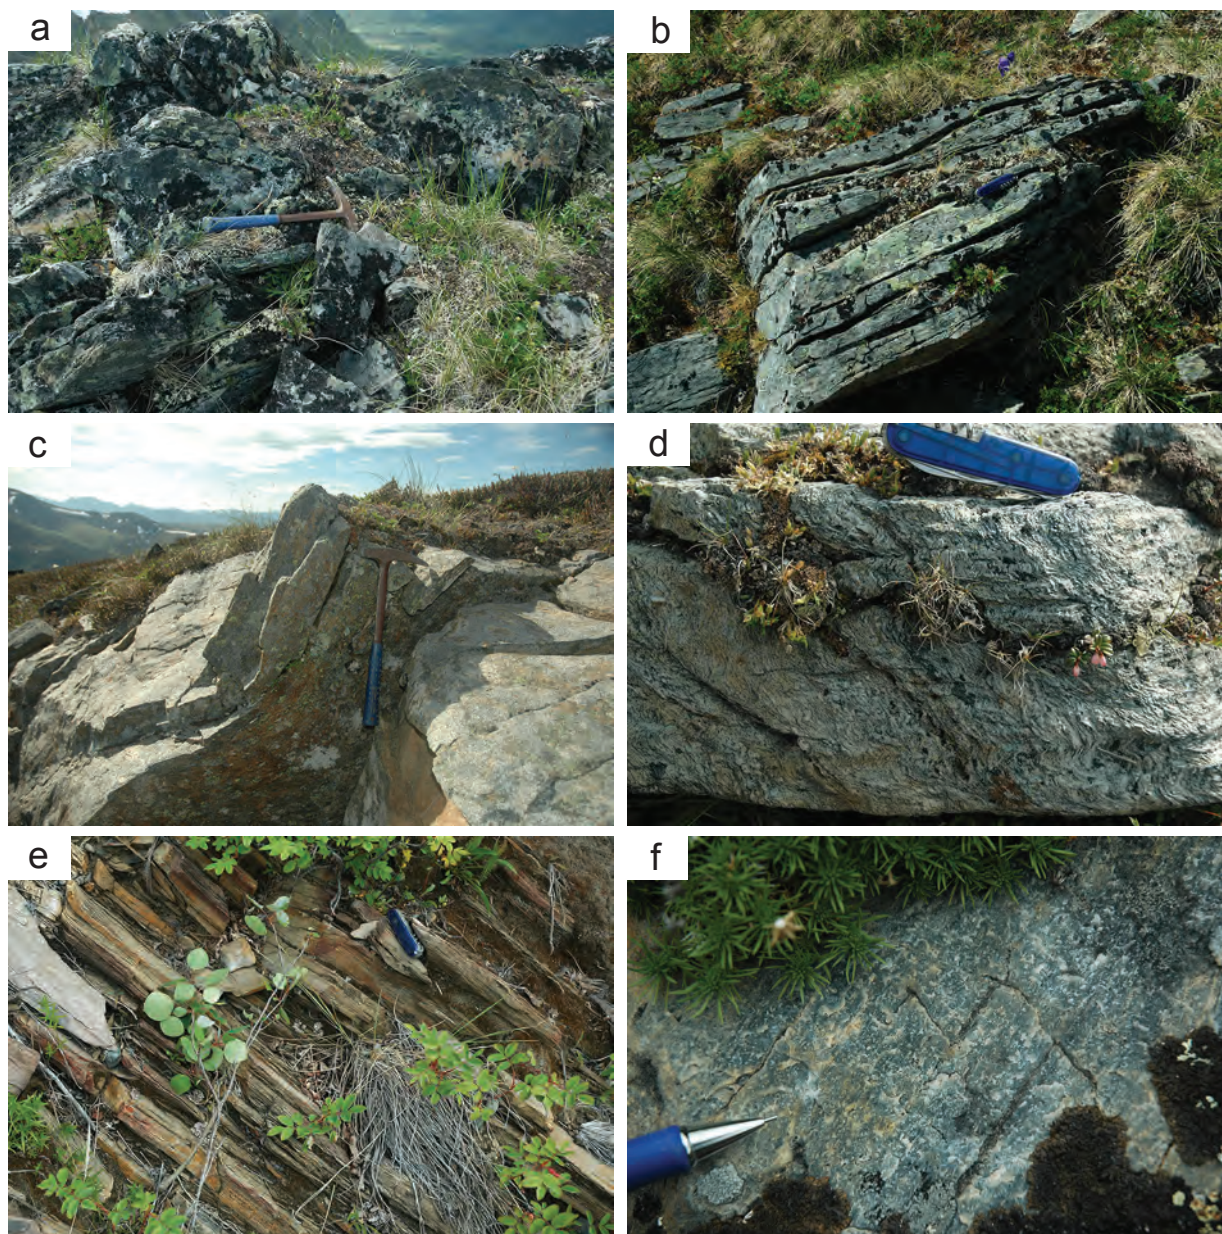

Supplement Figure 1. Outcrop photographs of detrital zircon samples. (A) Metasedimentary host rock to eclogite in Fig. 3, sample 12-8 at hammer, St. Cyr area. (B) Samples 12-22 and (C) 12-25 also host eclogite in the St. Cyr area. (D) Sample 12-67 is a non-eclogite bearing, crenulated quartz-mica schist from the westernmost thrust slice in the St. Cyr area. (E) Quartz-mica schist sample 12-72 from Last Peak. (F) Quartzite layer (12-75) adjacent to eclogite at Ross River. Pocket knife is 9 cm long, hammer head is approximately 18 cm and tip of pen is 3 cm.

See also:

Table DR1. LA-ICP-MS U/Pb Geochronologic Data and Apparent Ages  
[http://www.geosociety.org/datarepository/2017109\\_TableDR1](http://www.geosociety.org/datarepository/2017109_TableDR1)

Table DR1. LA-ICP-MS U/Pb Geochronologic Data and Apparent Ages

| Grain #                   | U<br>(ppm) | 206Pb<br>204Pb | Th/U  | Isotope ratios                           |          |                 |          |                |          |                | Apparent ages (Ma) |           |                |           |                  |           |      | Best age<br>(Ma) | Conc<br>(%) |
|---------------------------|------------|----------------|-------|------------------------------------------|----------|-----------------|----------|----------------|----------|----------------|--------------------|-----------|----------------|-----------|------------------|-----------|------|------------------|-------------|
|                           |            |                |       | 206Pb*<br>207Pb*                         | ±<br>(%) | 207Pb*<br>235U* | ±<br>(%) | 206Pb*<br>238U | ±<br>(%) | error<br>corr. | 206Pb*<br>238U*    | ±<br>(Ma) | 207Pb*<br>235U | ±<br>(Ma) | 206Pb*<br>207Pb* | ±<br>(Ma) |      |                  |             |
| Sample 12-75 - Ross River |            |                |       | UTM: Zone 08V 0616954 6884198 (n=81/102) |          |                 |          |                |          |                |                    |           |                |           |                  |           |      |                  |             |
| 26                        | 238        | 107,105        | 0.003 | 19.2247                                  | 1.1      | 0.2987          | 1.3      | 0.0417         | 0.8      | 0.57           | 263                | 2         | 265            | 3         | 286              | 25        | 263  | 2                | NA          |
| 87                        | 175        | 82,835         | 0.64  | 19.1446                                  | 0.9      | 0.3598          | 1.7      | 0.0500         | 1.5      | 0.86           | 314                | 5         | 312            | 5         | 296              | 20        | 314  | 5                | NA          |
| 77                        | 134        | 57,307         | 0.77  | 17.9668                                  | 1.6      | 0.4626          | 3.2      | 0.0603         | 2.8      | 0.86           | 377                | 10        | 386            | 10        | 439              | 36        | 377  | 10               | NA          |
| 32                        | 199        | 136,416        | 0.62  | 18.0513                                  | 0.8      | 0.5171          | 1.7      | 0.0677         | 1.5      | 0.89           | 422                | 6         | 423            | 6         | 428              | 17        | 422  | 6                | 99          |
| 11                        | 712        | 430,592        | 0.46  | 17.8528                                  | 1.2      | 0.5240          | 1.8      | 0.0679         | 1.4      | 0.76           | 423                | 6         | 428            | 6         | 453              | 26        | 423  | 6                | 93          |
| 63                        | 139        | 66,350         | 0.72  | 18.0949                                  | 0.9      | 0.5323          | 3.4      | 0.0699         | 3.3      | 0.96           | 435                | 14        | 433            | 12        | 423              | 21        | 435  | 14               | 103         |
| 23                        | 320        | 649,092        | 0.88  | 18.0041                                  | 0.7      | 0.5364          | 1.2      | 0.0700         | 1.0      | 0.79           | 436                | 4         | 436            | 4         | 434              | 16        | 436  | 4                | 101         |
| 72                        | 339        | 146,174        | 0.22  | 18.1101                                  | 0.9      | 0.5484          | 2.5      | 0.0720         | 2.3      | 0.93           | 448                | 10        | 444            | 9         | 421              | 20        | 448  | 10               | 106         |
| 44                        | 226        | 73,534         | 0.97  | 18.1403                                  | 0.8      | 0.5599          | 4.1      | 0.0737         | 4.0      | 0.98           | 458                | 18        | 451            | 15        | 417              | 19        | 458  | 18               | 110         |
| 38                        | 62         | 50,006         | 0.50  | 17.6417                                  | 0.9      | 0.5889          | 1.3      | 0.0753         | 1.0      | 0.75           | 468                | 4         | 470            | 5         | 479              | 19        | 468  | 4                | 98          |
| 46                        | 239        | 102,961        | 0.94  | 17.0406                                  | 0.7      | 0.7149          | 2.3      | 0.0884         | 2.2      | 0.95           | 546                | 12        | 548            | 10        | 555              | 16        | 546  | 12               | 98          |
| 88                        | 70         | 99,057         | 0.39  | 16.3491                                  | 1.2      | 0.9080          | 3.5      | 0.1077         | 3.3      | 0.94           | 659                | 21        | 656            | 17        | 645              | 26        | 659  | 21               | 102         |
| 21                        | 71         | 26,775         | 0.42  | 15.1640                                  | 1.8      | 1.1130          | 2.2      | 0.1224         | 1.3      | 0.59           | 744                | 9         | 760            | 12        | 805              | 37        | 744  | 9                | 93          |
| 69                        | 157        | 199,527        | 0.07  | 14.1361                                  | 1.1      | 1.4899          | 3.1      | 0.1527         | 2.9      | 0.94           | 916                | 25        | 926            | 19        | 950              | 22        | 950  | 22               | 96          |
| 70                        | 236        | 710,121        | 0.59  | 14.1021                                  | 1.0      | 1.5689          | 6.8      | 0.1605         | 6.8      | 0.99           | 959                | 60        | 958            | 42        | 955              | 20        | 955  | 20               | 100         |
| 65                        | 341        | 1,190,963      | 0.08  | 14.0631                                  | 0.9      | 1.5971          | 1.9      | 0.1629         | 1.7      | 0.88           | 973                | 15        | 969            | 12        | 961              | 18        | 961  | 18               | 101         |
| 31                        | 130        | 248,176        | 0.42  | 13.9801                                  | 1.1      | 1.5945          | 2.0      | 0.1617         | 1.6      | 0.84           | 966                | 15        | 968            | 12        | 973              | 22        | 973  | 22               | 99          |
| 98                        | 422        | 1,320,936      | 1.78  | 13.9015                                  | 1.1      | 1.5778          | 4.5      | 0.1591         | 4.3      | 0.97           | 952                | 38        | 962            | 28        | 984              | 22        | 984  | 22               | 97          |
| 53                        | 120        | 243,779        | 0.70  | 13.9003                                  | 0.8      | 1.6277          | 2.9      | 0.1641         | 2.8      | 0.96           | 979                | 25        | 981            | 18        | 984              | 17        | 984  | 17               | 100         |
| 24                        | 64         | 153,299        | 0.43  | 13.6086                                  | 0.8      | 1.7424          | 1.3      | 0.1720         | 1.0      | 0.80           | 1023               | 10        | 1024           | 8         | 1027             | 16        | 1027 | 16               | 100         |
| 94                        | 135        | 184,630        | 1.70  | 13.5705                                  | 1.0      | 1.8625          | 3.0      | 0.1833         | 2.8      | 0.94           | 1085               | 28        | 1068           | 20        | 1033             | 20        | 1033 | 20               | 105         |
| 89                        | 27         | 28,465         | 0.78  | 13.4479                                  | 0.6      | 1.7758          | 1.0      | 0.1732         | 0.8      | 0.79           | 1030               | 8         | 1037           | 7         | 1051             | 12        | 1051 | 12               | 98          |
| 76                        | 154        | 129,681        | 1.66  | 13.4141                                  | 0.9      | 1.9102          | 2.8      | 0.1858         | 2.6      | 0.95           | 1099               | 27        | 1085           | 19        | 1056             | 18        | 1056 | 18               | 104         |
| 17                        | 39         | 57,204         | 1.23  | 13.2329                                  | 0.7      | 1.8167          | 1.8      | 0.1744         | 1.7      | 0.92           | 1036               | 16        | 1052           | 12        | 1084             | 15        | 1084 | 15               | 96          |
| 34                        | 137        | 145,777        | 1.18  | 13.2088                                  | 0.8      | 1.8397          | 1.6      | 0.1762         | 1.3      | 0.85           | 1046               | 13        | 1060           | 10        | 1087             | 17        | 1087 | 17               | 96          |
| 1                         | 143        | 189,543        | 0.36  | 13.1670                                  | 0.8      | 1.8621          | 1.3      | 0.1778         | 1.0      | 0.77           | 1055               | 10        | 1068           | 9         | 1094             | 17        | 1094 | 17               | 96          |
| 78                        | 354        | 558,385        | 0.41  | 12.9070                                  | 1.5      | 2.0263          | 3.7      | 0.1897         | 3.4      | 0.91           | 1120               | 35        | 1124           | 25        | 1133             | 30        | 1133 | 30               | 99          |
| 52                        | 89         | 145,640        | 0.50  | 12.8851                                  | 0.8      | 2.1010          | 1.8      | 0.1963         | 1.6      | 0.90           | 1156               | 17        | 1149           | 12        | 1137             | 15        | 1137 | 15               | 102         |
| 96                        | 60         | 96,555         | 0.72  | 12.8814                                  | 0.5      | 2.1022          | 1.1      | 0.1964         | 1.0      | 0.90           | 1156               | 11        | 1150           | 8         | 1137             | 10        | 1137 | 10               | 102         |
| 50                        | 165        | 273,588        | 0.58  | 12.8486                                  | 1.2      | 2.0629          | 3.9      | 0.1922         | 3.6      | 0.95           | 1133               | 38        | 1137           | 26        | 1143             | 25        | 1143 | 25               | 99          |
| 7                         | 29         | 103,240        | 0.32  | 12.7955                                  | 0.7      | 2.0249          | 2.2      | 0.1879         | 2.1      | 0.95           | 1110               | 21        | 1124           | 15        | 1151             | 14        | 1151 | 14               | 96          |
| 100                       | 373        | 658,176        | 0.27  | 12.5974                                  | 0.6      | 2.1047          | 2.9      | 0.1923         | 2.9      | 0.98           | 1134               | 30        | 1150           | 20        | 1182             | 12        | 1182 | 12               | 96          |
| 28                        | 87         | 205,075        | 0.53  | 12.4652                                  | 0.7      | 2.3082          | 1.2      | 0.2087         | 1.0      | 0.82           | 1222               | 11        | 1215           | 9         | 1202             | 14        | 1202 | 14               | 102         |
| 6                         | 178        | 303,684        | 0.34  | 12.3159                                  | 0.5      | 2.3530          | 0.8      | 0.2102         | 0.5      | 0.71           | 1230               | 6         | 1228           | 6         | 1226             | 11        | 1226 | 11               | 100         |

|    |     |           |      |         |     |         |     |        |     |      |      |     |      |    |      |    |      |    |     |
|----|-----|-----------|------|---------|-----|---------|-----|--------|-----|------|------|-----|------|----|------|----|------|----|-----|
| 27 | 186 | 330,707   | 0.50 | 12.2669 | 0.9 | 2.3932  | 1.4 | 0.2129 | 1.1 | 0.78 | 1244 | 12  | 1241 | 10 | 1234 | 17 | 1234 | 17 | 101 |
| 90 | 380 | 442,816   | 0.73 | 12.2010 | 1.5 | 2.1503  | 2.4 | 0.1903 | 1.9 | 0.77 | 1123 | 19  | 1165 | 17 | 1245 | 30 | 1245 | 30 | 90  |
| 56 | 78  | 116,598   | 0.62 | 12.1410 | 0.5 | 2.4269  | 3.0 | 0.2137 | 2.9 | 0.99 | 1249 | 33  | 1251 | 21 | 1254 | 10 | 1254 | 10 | 100 |
| 19 | 108 | 209,180   | 0.50 | 12.0268 | 0.9 | 2.4994  | 1.7 | 0.2180 | 1.5 | 0.86 | 1271 | 17  | 1272 | 12 | 1273 | 17 | 1273 | 17 | 100 |
| 20 | 71  | 139,297   | 0.28 | 11.7295 | 0.8 | 2.6088  | 2.4 | 0.2219 | 2.3 | 0.94 | 1292 | 27  | 1303 | 18 | 1321 | 15 | 1321 | 15 | 98  |
| 49 | 360 | 654,183   | 0.52 | 11.4521 | 0.8 | 2.6497  | 1.6 | 0.2201 | 1.4 | 0.88 | 1282 | 17  | 1315 | 12 | 1368 | 15 | 1368 | 15 | 94  |
| 64 | 206 | 663,268   | 0.82 | 11.4192 | 0.8 | 2.7450  | 0.9 | 0.2273 | 0.3 | 0.36 | 1321 | 4   | 1341 | 7  | 1373 | 16 | 1373 | 16 | 96  |
| 8  | 293 | 382,688   | 0.61 | 11.2580 | 1.2 | 2.8528  | 1.5 | 0.2329 | 0.8 | 0.54 | 1350 | 10  | 1370 | 11 | 1400 | 24 | 1400 | 24 | 96  |
| 67 | 86  | 507,627   | 0.64 | 10.8733 | 0.6 | 3.2695  | 1.6 | 0.2578 | 1.5 | 0.94 | 1479 | 20  | 1474 | 13 | 1467 | 11 | 1467 | 11 | 101 |
| 62 | 233 | 643,694   | 0.57 | 10.8431 | 0.8 | 3.3637  | 7.8 | 0.2645 | 7.7 | 0.99 | 1513 | 104 | 1496 | 61 | 1472 | 15 | 1472 | 15 | 103 |
| 41 | 70  | 399,502   | 0.63 | 10.6983 | 0.5 | 3.5552  | 1.8 | 0.2759 | 1.7 | 0.95 | 1570 | 23  | 1540 | 14 | 1497 | 10 | 1497 | 10 | 105 |
| 81 | 423 | 1,895,770 | 0.34 | 10.6951 | 1.6 | 3.3641  | 2.7 | 0.2609 | 2.2 | 0.80 | 1495 | 29  | 1496 | 21 | 1498 | 31 | 1498 | 31 | 100 |
| 5  | 208 | 545,631   | 0.79 | 10.6920 | 0.9 | 3.2990  | 1.3 | 0.2558 | 1.0 | 0.73 | 1468 | 13  | 1481 | 10 | 1499 | 17 | 1499 | 17 | 98  |
| 74 | 50  | 101,290   | 4.01 | 10.6650 | 0.6 | 3.3986  | 2.3 | 0.2629 | 2.2 | 0.97 | 1505 | 30  | 1504 | 18 | 1503 | 11 | 1503 | 11 | 100 |
| 30 | 83  | 92,627    | 1.23 | 10.0683 | 0.7 | 3.9427  | 1.2 | 0.2879 | 1.0 | 0.82 | 1631 | 14  | 1622 | 10 | 1611 | 13 | 1611 | 13 | 101 |
| 14 | 160 | 200,619   | 1.30 | 9.9986  | 1.2 | 3.8649  | 4.9 | 0.2803 | 4.7 | 0.97 | 1593 | 67  | 1606 | 39 | 1624 | 23 | 1624 | 23 | 98  |
| 18 | 103 | 305,313   | 1.78 | 9.9224  | 0.9 | 3.8488  | 1.3 | 0.2770 | 1.0 | 0.74 | 1576 | 13  | 1603 | 10 | 1639 | 16 | 1639 | 16 | 96  |
| 82 | 87  | 57,806    | 1.19 | 9.8960  | 0.7 | 4.1758  | 2.0 | 0.2997 | 1.9 | 0.94 | 1690 | 28  | 1669 | 16 | 1643 | 12 | 1643 | 12 | 103 |
| 66 | 80  | 114,550   | 0.98 | 9.8821  | 0.8 | 3.9985  | 2.4 | 0.2866 | 2.3 | 0.95 | 1624 | 33  | 1634 | 20 | 1646 | 15 | 1646 | 15 | 99  |
| 59 | 118 | 371,314   | 0.89 | 9.8499  | 1.0 | 4.1408  | 1.4 | 0.2958 | 0.9 | 0.64 | 1671 | 13  | 1662 | 11 | 1652 | 19 | 1652 | 19 | 101 |
| 42 | 210 | 1,346,409 | 0.43 | 9.8478  | 1.3 | 4.1933  | 1.6 | 0.2995 | 1.0 | 0.63 | 1689 | 15  | 1673 | 13 | 1653 | 23 | 1653 | 23 | 102 |
| 48 | 177 | 259,186   | 0.39 | 9.8429  | 1.0 | 4.0621  | 2.6 | 0.2900 | 2.4 | 0.93 | 1641 | 35  | 1647 | 21 | 1653 | 18 | 1653 | 18 | 99  |
| 22 | 123 | 227,257   | 0.85 | 9.6715  | 0.6 | 4.0684  | 1.7 | 0.2854 | 1.6 | 0.93 | 1618 | 23  | 1648 | 14 | 1686 | 12 | 1686 | 12 | 96  |
| 60 | 104 | 110,110   | 0.67 | 9.6641  | 1.1 | 4.1217  | 1.6 | 0.2889 | 1.3 | 0.76 | 1636 | 18  | 1659 | 13 | 1687 | 20 | 1687 | 20 | 97  |
| 75 | 90  | 183,851   | 0.68 | 9.4379  | 0.6 | 4.4338  | 1.8 | 0.3035 | 1.7 | 0.94 | 1709 | 26  | 1719 | 15 | 1731 | 11 | 1731 | 11 | 99  |
| 55 | 273 | 631,210   | 0.58 | 8.9445  | 1.2 | 4.8453  | 2.6 | 0.3143 | 2.3 | 0.89 | 1762 | 35  | 1793 | 22 | 1829 | 22 | 1829 | 22 | 96  |
| 13 | 276 | 1,180,625 | 0.56 | 8.9358  | 1.8 | 4.5800  | 2.0 | 0.2968 | 0.8 | 0.40 | 1676 | 12  | 1746 | 17 | 1831 | 33 | 1831 | 33 | 92  |
| 12 | 95  | 173,730   | 0.75 | 8.8951  | 0.5 | 5.0739  | 0.9 | 0.3273 | 0.7 | 0.77 | 1825 | 10  | 1832 | 7  | 1839 | 10 | 1839 | 10 | 99  |
| 9  | 156 | 963,848   | 0.71 | 8.8734  | 1.0 | 5.0003  | 1.5 | 0.3218 | 1.1 | 0.76 | 1799 | 18  | 1819 | 13 | 1843 | 18 | 1843 | 18 | 98  |
| 29 | 308 | 1,267,006 | 1.26 | 8.8516  | 1.5 | 4.9874  | 1.8 | 0.3202 | 1.1 | 0.59 | 1791 | 17  | 1817 | 15 | 1848 | 26 | 1848 | 26 | 97  |
| 57 | 89  | 244,729   | 0.41 | 8.7579  | 0.7 | 5.4189  | 1.6 | 0.3442 | 1.4 | 0.90 | 1907 | 24  | 1888 | 14 | 1867 | 13 | 1867 | 13 | 102 |
| 68 | 97  | 1,134,772 | 1.17 | 8.6947  | 1.1 | 5.6288  | 3.2 | 0.3550 | 3.0 | 0.94 | 1958 | 51  | 1921 | 28 | 1880 | 19 | 1880 | 19 | 104 |
| 45 | 51  | 150,511   | 1.06 | 8.5298  | 1.0 | 5.6348  | 1.9 | 0.3486 | 1.6 | 0.86 | 1928 | 27  | 1921 | 16 | 1915 | 17 | 1915 | 17 | 101 |
| 15 | 230 | 448,916   | 0.45 | 8.5232  | 1.3 | 5.5249  | 1.9 | 0.3415 | 1.4 | 0.72 | 1894 | 23  | 1904 | 17 | 1916 | 24 | 1916 | 24 | 99  |
| 35 | 358 | 922,281   | 0.24 | 8.3340  | 1.6 | 5.2350  | 3.2 | 0.3164 | 2.8 | 0.86 | 1772 | 43  | 1858 | 28 | 1956 | 29 | 1956 | 29 | 91  |
| 37 | 30  | 183,056   | 1.44 | 8.1467  | 0.5 | 6.5041  | 1.1 | 0.3843 | 1.0 | 0.87 | 2096 | 17  | 2046 | 10 | 1997 | 9  | 1997 | 9  | 105 |
| 33 | 31  | 71,674    | 0.73 | 8.1357  | 0.7 | 6.2145  | 1.2 | 0.3667 | 1.0 | 0.84 | 2014 | 17  | 2006 | 10 | 1999 | 12 | 1999 | 12 | 101 |
| 71 | 59  | 176,382   | 1.28 | 8.1087  | 0.7 | 6.5085  | 3.0 | 0.3828 | 3.0 | 0.97 | 2089 | 53  | 2047 | 27 | 2005 | 13 | 2005 | 13 | 104 |
| 91 | 59  | 203,863   | 0.65 | 6.2011  | 1.2 | 10.1802 | 2.1 | 0.4579 | 1.7 | 0.82 | 2430 | 34  | 2451 | 19 | 2469 | 20 | 2469 | 20 | 98  |
| 39 | 154 | 847,190   | 0.35 | 5.7735  | 0.7 | 11.8527 | 2.9 | 0.4963 | 2.8 | 0.97 | 2598 | 61  | 2593 | 27 | 2589 | 12 | 2589 | 12 | 100 |
| 43 | 154 | 873,310   | 0.73 | 5.5706  | 0.9 | 11.6480 | 2.8 | 0.4706 | 2.6 | 0.95 | 2486 | 55  | 2577 | 26 | 2648 | 15 | 2648 | 15 | 94  |

|    |     |           |      |        |     |         |     |        |     |      |      |    |      |    |      |    |      |    |     |
|----|-----|-----------|------|--------|-----|---------|-----|--------|-----|------|------|----|------|----|------|----|------|----|-----|
| 85 | 51  | 396,921   | 1.22 | 5.5278 | 0.6 | 13.4683 | 1.7 | 0.5400 | 1.6 | 0.93 | 2783 | 36 | 2713 | 16 | 2661 | 10 | 2661 | 10 | 105 |
| 40 | 226 | 1,419,738 | 1.18 | 5.2417 | 1.9 | 13.7048 | 2.9 | 0.5210 | 2.2 | 0.75 | 2703 | 48 | 2730 | 28 | 2749 | 31 | 2749 | 31 | 98  |
| 83 | 312 | 1,518,513 | 0.50 | 5.1627 | 1.5 | 14.6642 | 2.8 | 0.5491 | 2.4 | 0.85 | 2821 | 55 | 2794 | 27 | 2774 | 24 | 2774 | 24 | 102 |
| 2  | 22  | 92,157    | 0.63 | 4.1178 | 0.8 | 20.5167 | 1.7 | 0.6127 | 1.5 | 0.89 | 3081 | 37 | 3116 | 17 | 3139 | 12 | 3139 | 12 | 98  |
| 86 | 57  | 231,998   | 0.53 | 3.9551 | 3.0 | 23.1252 | 4.2 | 0.6633 | 3.0 | 0.70 | 3280 | 76 | 3232 | 41 | 3203 | 47 | 3203 | 47 | 102 |

# Rejected analyses

|    |     |           |      |         |      |         |      |        |      |      |      |     |      |     |      |     |      |     |     |
|----|-----|-----------|------|---------|------|---------|------|--------|------|------|------|-----|------|-----|------|-----|------|-----|-----|
| 54 | 338 | 176,918   | 0.72 | 16.9997 | 3.1  | 0.5767  | 6.9  | 0.0711 | 6.2  | 0.89 | 443  | 26  | 462  | 26  | 561  | 68  | 443  | 26  | 79  |
| 36 | 545 | 55,410    | 1.12 | 17.2185 | 2.3  | 0.5784  | 2.6  | 0.0722 | 1.3  | 0.49 | 450  | 6   | 463  | 10  | 533  | 50  | 450  | 6   | 84  |
| 51 | 183 | 294,068   | 0.03 | 17.1750 | 4.4  | 0.5982  | 6.9  | 0.0745 | 5.3  | 0.77 | 463  | 24  | 476  | 26  | 538  | 96  | 463  | 24  | 86  |
| 4  | 644 | 241,951   | 0.11 | 13.1466 | 1.6  | 1.6444  | 2.7  | 0.1568 | 2.2  | 0.81 | 939  | 19  | 987  | 17  | 1097 | 32  | 1097 | 32  | 86  |
| 25 | 274 | 231,288   | 0.54 | 12.8831 | 0.6  | 1.8035  | 2.1  | 0.1685 | 2.0  | 0.95 | 1004 | 19  | 1047 | 14  | 1137 | 13  | 1137 | 13  | 88  |
| 99 | 63  | 106,699   | 0.48 | 12.7347 | 0.7  | 2.3651  | 1.7  | 0.2184 | 1.5  | 0.90 | 1274 | 18  | 1232 | 12  | 1160 | 15  | 1160 | 15  | 110 |
| 73 | 173 | 185,183   | 0.42 | 12.5467 | 3.0  | 1.7379  | 9.3  | 0.1581 | 8.8  | 0.95 | 946  | 78  | 1023 | 60  | 1190 | 58  | 1190 | 58  | 80  |
| 80 | 375 | 17,208    | 0.39 | 12.1442 | 2.1  | 1.3339  | 7.0  | 0.1175 | 6.7  | 0.95 | 716  | 45  | 861  | 41  | 1254 | 41  | 1254 | 41  | 57  |
| 79 | 145 | 368,827   | 0.53 | 11.3478 | 0.9  | 3.1325  | 2.1  | 0.2578 | 1.8  | 0.90 | 1479 | 24  | 1441 | 16  | 1385 | 17  | 1385 | 17  | 107 |
| 16 | 513 | 356,746   | 0.44 | 10.9885 | 4.1  | 2.1711  | 5.0  | 0.1730 | 2.9  | 0.57 | 1029 | 27  | 1172 | 35  | 1447 | 78  | 1447 | 78  | 71  |
| 92 | 694 | 695,925   | 0.04 | 10.7761 | 1.7  | 2.8025  | 1.8  | 0.2190 | 0.3  | 0.19 | 1277 | 4   | 1356 | 13  | 1484 | 33  | 1484 | 33  | 86  |
| 95 | 325 | 305,917   | 0.94 | 10.1491 | 1.4  | 3.3083  | 2.1  | 0.2435 | 1.5  | 0.74 | 1405 | 19  | 1483 | 16  | 1596 | 26  | 1596 | 26  | 88  |
| 93 | 144 | 102,624   | 0.20 | 9.7817  | 25.2 | 2.1721  | 32.0 | 0.1541 | 19.7 | 0.61 | 924  | 169 | 1172 | 226 | 1665 | 474 | 1665 | 474 | 55  |
| 3  | 743 | 1,484,481 | 0.42 | 8.8771  | 2.1  | 4.4610  | 2.6  | 0.2872 | 1.5  | 0.59 | 1628 | 22  | 1724 | 22  | 1843 | 38  | 1843 | 38  | 88  |
| 97 | 393 | 206,290   | 0.94 | 6.2437  | 3.2  | 5.6954  | 36.7 | 0.2579 | 36.6 | 1.00 | 1479 | 485 | 1931 | 328 | 2457 | 54  | 2457 | 54  | 60  |
| 84 | 221 | 993,803   | 0.34 | 5.3046  | 3.3  | 9.9870  | 4.4  | 0.3842 | 2.9  | 0.66 | 2096 | 51  | 2434 | 40  | 2729 | 54  | 2729 | 54  | 77  |
| 47 | 463 | 2,147,621 | 0.40 | 5.0951  | 12.9 | 12.2865 | 13.1 | 0.4540 | 2.2  | 0.17 | 2413 | 44  | 2627 | 123 | 2795 | 212 | 2795 | 212 | 86  |

# Sample 12-72 - Last Peak UTM: Zone 08V 0530082 6830966 (n=70/101)

|    |     |         |      |        |     |        |     |        |     |      |      |    |      |    |      |    |      |    |     |
|----|-----|---------|------|--------|-----|--------|-----|--------|-----|------|------|----|------|----|------|----|------|----|-----|
| 78 | 248 | 78,278  | 0.19 | 9.2230 | 0.4 | 4.4211 | 1.8 | 0.2957 | 1.7 | 0.98 | 1670 | 26 | 1716 | 15 | 1773 | 6  | 1773 | 6  | 94  |
| 85 | 180 | 40,216  | 0.27 | 9.2197 | 0.4 | 4.4018 | 1.4 | 0.2943 | 1.4 | 0.96 | 1663 | 20 | 1713 | 12 | 1774 | 7  | 1774 | 7  | 94  |
| 1  | 74  | 149,565 | 0.62 | 9.2190 | 0.5 | 4.7007 | 1.8 | 0.3143 | 1.7 | 0.95 | 1762 | 26 | 1767 | 15 | 1774 | 10 | 1774 | 10 | 99  |
| 51 | 174 | 86,882  | 0.48 | 9.2024 | 0.3 | 4.4160 | 2.3 | 0.2947 | 2.3 | 0.99 | 1665 | 33 | 1715 | 19 | 1777 | 6  | 1777 | 6  | 94  |
| 36 | 82  | 147,553 | 0.59 | 9.1822 | 0.4 | 4.7623 | 1.3 | 0.3171 | 1.2 | 0.94 | 1776 | 19 | 1778 | 11 | 1781 | 8  | 1781 | 8  | 100 |
| 57 | 186 | 94,462  | 0.65 | 9.1697 | 0.2 | 4.7134 | 0.7 | 0.3135 | 0.7 | 0.96 | 1758 | 11 | 1770 | 6  | 1784 | 3  | 1784 | 3  | 99  |
| 29 | 142 | 230,345 | 0.47 | 9.1541 | 0.3 | 4.8280 | 0.8 | 0.3205 | 0.7 | 0.92 | 1792 | 11 | 1790 | 7  | 1787 | 6  | 1787 | 6  | 100 |
| 23 | 110 | 182,348 | 0.43 | 9.1387 | 0.4 | 4.8628 | 1.1 | 0.3223 | 1.0 | 0.92 | 1801 | 16 | 1796 | 9  | 1790 | 8  | 1790 | 8  | 101 |
| 75 | 73  | 66,262  | 0.49 | 9.1316 | 0.5 | 4.8388 | 3.2 | 0.3205 | 3.2 | 0.99 | 1792 | 50 | 1792 | 27 | 1791 | 10 | 1791 | 10 | 100 |
| 7  | 114 | 265,544 | 0.88 | 8.9514 | 0.6 | 5.0268 | 1.2 | 0.3264 | 1.1 | 0.89 | 1821 | 17 | 1824 | 10 | 1827 | 10 | 1827 | 10 | 100 |
| 15 | 77  | 159,294 | 0.98 | 8.9107 | 0.3 | 5.1250 | 3.7 | 0.3312 | 3.7 | 1.00 | 1844 | 60 | 1840 | 32 | 1836 | 6  | 1836 | 6  | 100 |
| 24 | 61  | 240,837 | 0.51 | 8.8033 | 0.7 | 5.2245 | 1.5 | 0.3336 | 1.3 | 0.88 | 1856 | 21 | 1857 | 12 | 1858 | 12 | 1858 | 12 | 100 |
| 73 | 86  | 166,680 | 1.53 | 8.7942 | 0.7 | 5.1923 | 1.4 | 0.3312 | 1.2 | 0.85 | 1844 | 19 | 1851 | 12 | 1860 | 13 | 1860 | 13 | 99  |



|    |     |         |      |        |     |         |     |        |     |      |      |    |      |    |      |    |      |    |     |
|----|-----|---------|------|--------|-----|---------|-----|--------|-----|------|------|----|------|----|------|----|------|----|-----|
| 60 | 60  | 41,346  | 2.13 | 8.7848 | 1.2 | 5.2074  | 1.6 | 0.3318 | 1.1 | 0.69 | 1847 | 18 | 1854 | 14 | 1861 | 21 | 1861 | 21 | 99  |
| 4  | 57  | 126,048 | 1.18 | 8.7763 | 0.9 | 5.2506  | 1.6 | 0.3342 | 1.3 | 0.82 | 1859 | 21 | 1861 | 13 | 1863 | 16 | 1863 | 16 | 100 |
| 35 | 126 | 46,960  | 0.35 | 8.7653 | 0.4 | 4.8223  | 2.9 | 0.3066 | 2.9 | 0.99 | 1724 | 44 | 1789 | 25 | 1865 | 7  | 1865 | 7  | 92  |
| 31 | 68  | 69,603  | 0.64 | 8.7594 | 0.8 | 5.1894  | 1.2 | 0.3297 | 0.9 | 0.74 | 1837 | 15 | 1851 | 11 | 1867 | 15 | 1867 | 15 | 98  |
| 12 | 105 | 541,503 | 0.78 | 8.7563 | 0.6 | 5.3075  | 1.4 | 0.3371 | 1.2 | 0.90 | 1873 | 20 | 1870 | 12 | 1867 | 11 | 1867 | 11 | 100 |
| 48 | 70  | 95,647  | 0.54 | 8.7471 | 0.9 | 4.8604  | 2.1 | 0.3083 | 1.9 | 0.91 | 1733 | 29 | 1795 | 18 | 1869 | 16 | 1869 | 16 | 93  |
| 71 | 181 | 305,779 | 0.69 | 8.7413 | 0.3 | 5.1938  | 2.4 | 0.3293 | 2.3 | 0.99 | 1835 | 37 | 1852 | 20 | 1870 | 6  | 1870 | 6  | 98  |
| 17 | 60  | 67,072  | 1.06 | 8.7352 | 0.9 | 5.0732  | 3.5 | 0.3214 | 3.4 | 0.97 | 1797 | 54 | 1832 | 30 | 1872 | 16 | 1872 | 16 | 96  |
| 33 | 155 | 272,104 | 0.79 | 8.7274 | 0.4 | 5.2702  | 2.0 | 0.3336 | 2.0 | 0.98 | 1856 | 32 | 1864 | 17 | 1873 | 7  | 1873 | 7  | 99  |
| 22 | 21  | 59,702  | 1.30 | 8.7255 | 1.0 | 5.3918  | 1.7 | 0.3412 | 1.3 | 0.79 | 1893 | 22 | 1884 | 14 | 1874 | 19 | 1874 | 19 | 101 |
| 47 | 42  | 185,009 | 0.83 | 8.7197 | 0.9 | 5.2600  | 2.5 | 0.3326 | 2.3 | 0.92 | 1851 | 36 | 1862 | 21 | 1875 | 17 | 1875 | 17 | 99  |
| 82 | 90  | 145,560 | 1.15 | 8.5552 | 0.3 | 5.5138  | 1.5 | 0.3421 | 1.5 | 0.99 | 1897 | 25 | 1903 | 13 | 1909 | 5  | 1909 | 5  | 99  |
| 69 | 44  | 48,036  | 1.18 | 8.5477 | 1.2 | 5.1289  | 1.9 | 0.3180 | 1.5 | 0.79 | 1780 | 23 | 1841 | 16 | 1911 | 21 | 1911 | 21 | 93  |
| 84 | 51  | 102,065 | 0.58 | 8.5416 | 0.8 | 5.5338  | 1.9 | 0.3428 | 1.7 | 0.90 | 1900 | 27 | 1906 | 16 | 1912 | 15 | 1912 | 15 | 99  |
| 87 | 75  | 166,566 | 0.68 | 8.5122 | 0.5 | 5.5944  | 2.4 | 0.3454 | 2.4 | 0.98 | 1912 | 40 | 1915 | 21 | 1918 | 9  | 1918 | 9  | 100 |
| 67 | 192 | 141,725 | 0.22 | 8.4443 | 0.2 | 5.1088  | 2.8 | 0.3129 | 2.8 | 1.00 | 1755 | 43 | 1838 | 24 | 1933 | 4  | 1933 | 4  | 91  |
| 18 | 27  | 67,644  | 1.38 | 8.2251 | 2.2 | 5.6947  | 3.2 | 0.3397 | 2.3 | 0.72 | 1885 | 38 | 1931 | 28 | 1980 | 40 | 1980 | 40 | 95  |
| 66 | 33  | 92,817  | 1.34 | 8.2053 | 1.3 | 5.9989  | 2.5 | 0.3570 | 2.1 | 0.86 | 1968 | 36 | 1976 | 21 | 1984 | 22 | 1984 | 22 | 99  |
| 55 | 128 | 260,083 | 0.64 | 8.1972 | 0.4 | 5.8353  | 1.0 | 0.3469 | 0.9 | 0.92 | 1920 | 16 | 1952 | 9  | 1986 | 7  | 1986 | 7  | 97  |
| 63 | 122 | 322,381 | 1.04 | 8.1810 | 0.4 | 6.0836  | 1.5 | 0.3610 | 1.4 | 0.95 | 1987 | 24 | 1988 | 13 | 1989 | 8  | 1989 | 8  | 100 |
| 8  | 218 | 232,457 | 0.26 | 8.1659 | 0.2 | 5.9369  | 0.8 | 0.3516 | 0.7 | 0.98 | 1942 | 13 | 1967 | 7  | 1992 | 3  | 1992 | 3  | 97  |
| 72 | 63  | 107,401 | 0.97 | 8.1200 | 0.5 | 6.1200  | 1.3 | 0.3604 | 1.2 | 0.92 | 1984 | 20 | 1993 | 11 | 2002 | 9  | 2002 | 9  | 99  |
| 16 | 101 | 142,266 | 1.95 | 8.1143 | 0.5 | 6.1226  | 1.1 | 0.3603 | 1.0 | 0.88 | 1984 | 16 | 1993 | 10 | 2004 | 9  | 2004 | 9  | 99  |
| 96 | 73  | 196,727 | 0.75 | 7.7931 | 0.6 | 6.5994  | 3.8 | 0.3730 | 3.8 | 0.99 | 2044 | 66 | 2059 | 34 | 2075 | 10 | 2075 | 10 | 98  |
| 97 | 90  | 168,676 | 0.78 | 7.7709 | 0.5 | 6.3826  | 2.0 | 0.3597 | 1.9 | 0.97 | 1981 | 33 | 2030 | 18 | 2080 | 9  | 2080 | 9  | 95  |
| 37 | 115 | 246,060 | 0.43 | 7.4920 | 0.3 | 7.2339  | 1.0 | 0.3931 | 0.9 | 0.95 | 2137 | 17 | 2141 | 9  | 2144 | 5  | 2144 | 5  | 100 |
| 91 | 188 | 47,272  | 0.61 | 7.3943 | 0.2 | 7.2762  | 0.9 | 0.3902 | 0.9 | 0.98 | 2124 | 16 | 2146 | 8  | 2167 | 3  | 2167 | 3  | 98  |
| 25 | 92  | 148,479 | 1.44 | 7.3885 | 0.3 | 7.2982  | 1.2 | 0.3911 | 1.2 | 0.96 | 2128 | 21 | 2149 | 11 | 2168 | 6  | 2168 | 6  | 98  |
| 30 | 121 | 34,714  | 0.71 | 6.8494 | 0.3 | 7.8385  | 1.2 | 0.3894 | 1.2 | 0.97 | 2120 | 21 | 2213 | 11 | 2300 | 5  | 2300 | 5  | 92  |
| 61 | 176 | 195,046 | 0.53 | 6.8433 | 0.2 | 8.2877  | 4.0 | 0.4113 | 4.0 | 1.00 | 2221 | 75 | 2263 | 36 | 2301 | 4  | 2301 | 4  | 97  |
| 94 | 56  | 117,085 | 0.54 | 6.7735 | 0.4 | 8.9145  | 1.3 | 0.4379 | 1.2 | 0.95 | 2341 | 23 | 2329 | 11 | 2319 | 7  | 2319 | 7  | 101 |
| 11 | 170 | 258,940 | 0.63 | 6.7659 | 0.1 | 8.4774  | 1.2 | 0.4160 | 1.2 | 0.99 | 2242 | 22 | 2284 | 11 | 2321 | 2  | 2321 | 2  | 97  |
| 34 | 74  | 8,193   | 0.58 | 6.7338 | 0.7 | 8.5082  | 1.2 | 0.4155 | 1.0 | 0.83 | 2240 | 19 | 2287 | 11 | 2329 | 12 | 2329 | 12 | 96  |
| 54 | 145 | 354,212 | 0.94 | 6.6918 | 0.6 | 8.6907  | 1.6 | 0.4218 | 1.5 | 0.92 | 2269 | 29 | 2306 | 15 | 2339 | 11 | 2339 | 11 | 97  |
| 3  | 101 | 198,727 | 0.66 | 6.1837 | 0.1 | 10.2129 | 1.6 | 0.4580 | 1.6 | 1.00 | 2431 | 33 | 2454 | 15 | 2474 | 2  | 2474 | 2  | 98  |
| 39 | 188 | 476,285 | 0.45 | 6.1175 | 0.7 | 9.9146  | 1.9 | 0.4399 | 1.7 | 0.92 | 2350 | 33 | 2427 | 17 | 2492 | 13 | 2492 | 13 | 94  |
| 46 | 29  | 91,031  | 1.07 | 5.9249 | 0.8 | 10.7478 | 1.7 | 0.4618 | 1.5 | 0.89 | 2448 | 31 | 2502 | 16 | 2546 | 13 | 2546 | 13 | 96  |
| 80 | 211 | 313,324 | 0.65 | 5.7826 | 0.3 | 11.3352 | 4.4 | 0.4754 | 4.3 | 1.00 | 2507 | 90 | 2551 | 41 | 2586 | 5  | 2586 | 5  | 97  |
| 95 | 124 | 625,575 | 0.47 | 5.7592 | 0.3 | 11.1251 | 1.5 | 0.4647 | 1.4 | 0.97 | 2460 | 29 | 2534 | 14 | 2593 | 6  | 2593 | 6  | 95  |
| 52 | 98  | 223,614 | 0.53 | 5.7347 | 0.3 | 11.7631 | 0.9 | 0.4892 | 0.9 | 0.96 | 2567 | 18 | 2586 | 8  | 2600 | 4  | 2600 | 4  | 99  |
| 40 | 187 | 411,250 | 0.62 | 5.7325 | 0.3 | 11.5014 | 1.8 | 0.4782 | 1.7 | 0.98 | 2519 | 36 | 2565 | 17 | 2601 | 6  | 2601 | 6  | 97  |

|    |     |         |      |        |     |         |     |        |     |      |      |    |      |    |      |    |      |    |     |
|----|-----|---------|------|--------|-----|---------|-----|--------|-----|------|------|----|------|----|------|----|------|----|-----|
| 5  | 83  | 215,295 | 0.53 | 5.7193 | 0.3 | 12.0718 | 1.5 | 0.5007 | 1.5 | 0.97 | 2617 | 31 | 2610 | 14 | 2605 | 6  | 2605 | 6  | 100 |
| 83 | 114 | 212,709 | 0.45 | 5.7000 | 0.2 | 12.0608 | 0.8 | 0.4986 | 0.8 | 0.97 | 2608 | 16 | 2609 | 7  | 2610 | 3  | 2610 | 3  | 100 |
| 38 | 13  | 38,504  | 0.92 | 5.6872 | 1.5 | 11.7906 | 2.0 | 0.4863 | 1.3 | 0.66 | 2555 | 27 | 2588 | 18 | 2614 | 24 | 2614 | 24 | 98  |
| 62 | 79  | 134,979 | 0.57 | 5.6356 | 0.2 | 12.0672 | 1.5 | 0.4932 | 1.5 | 0.99 | 2585 | 32 | 2610 | 14 | 2629 | 3  | 2629 | 3  | 98  |
| 14 | 47  | 210,507 | 0.81 | 5.5318 | 0.3 | 12.6668 | 1.7 | 0.5082 | 1.7 | 0.98 | 2649 | 37 | 2655 | 16 | 2660 | 5  | 2660 | 5  | 100 |
| 79 | 120 | 14,266  | 0.67 | 5.5181 | 0.9 | 12.1594 | 2.4 | 0.4866 | 2.2 | 0.93 | 2556 | 47 | 2617 | 23 | 2664 | 15 | 2664 | 15 | 96  |
| 89 | 47  | 244,592 | 0.65 | 5.5110 | 0.5 | 12.6919 | 1.5 | 0.5073 | 1.5 | 0.94 | 2645 | 31 | 2657 | 14 | 2666 | 8  | 2666 | 8  | 99  |
| 13 | 17  | 54,055  | 1.49 | 5.5045 | 0.9 | 12.2692 | 3.0 | 0.4898 | 2.8 | 0.95 | 2570 | 60 | 2625 | 28 | 2668 | 16 | 2668 | 16 | 96  |
| 19 | 75  | 306,721 | 0.79 | 5.4771 | 0.7 | 12.9133 | 1.8 | 0.5130 | 1.7 | 0.93 | 2669 | 37 | 2673 | 17 | 2676 | 11 | 2676 | 11 | 100 |
| 90 | 89  | 255,278 | 1.21 | 5.4738 | 0.2 | 12.8838 | 1.8 | 0.5115 | 1.8 | 0.99 | 2663 | 39 | 2671 | 17 | 2677 | 4  | 2677 | 4  | 99  |
| 10 | 37  | 18,876  | 1.25 | 5.4732 | 0.6 | 12.3063 | 1.1 | 0.4885 | 0.9 | 0.83 | 2564 | 18 | 2628 | 10 | 2678 | 10 | 2678 | 10 | 96  |
| 43 | 57  | 312,320 | 0.99 | 5.4530 | 0.3 | 13.0060 | 1.6 | 0.5144 | 1.5 | 0.98 | 2675 | 34 | 2680 | 15 | 2684 | 6  | 2684 | 6  | 100 |
| 68 | 77  | 207,455 | 1.17 | 5.4508 | 0.2 | 12.6249 | 2.1 | 0.4991 | 2.0 | 0.99 | 2610 | 44 | 2652 | 19 | 2684 | 4  | 2684 | 4  | 97  |
| 49 | 46  | 101,817 | 0.48 | 5.3899 | 0.6 | 13.0775 | 0.9 | 0.5112 | 0.7 | 0.77 | 2662 | 16 | 2685 | 9  | 2703 | 10 | 2703 | 10 | 98  |
| 44 | 73  | 155,267 | 0.99 | 5.3597 | 0.3 | 13.3886 | 1.0 | 0.5204 | 0.9 | 0.95 | 2701 | 20 | 2707 | 9  | 2712 | 5  | 2712 | 5  | 100 |
| 65 | 65  | 232,323 | 0.73 | 5.2589 | 0.3 | 13.5690 | 2.6 | 0.5175 | 2.5 | 0.99 | 2689 | 56 | 2720 | 24 | 2743 | 5  | 2743 | 5  | 98  |

**Rejected analyses**

|     |     |         |      |         |      |        |      |        |      |      |      |     |      |     |      |     |      |    |     |
|-----|-----|---------|------|---------|------|--------|------|--------|------|------|------|-----|------|-----|------|-----|------|----|-----|
| 53  | 17  | 7,106   | 1.05 | 17.7621 | 16.3 | 0.6801 | 16.6 | 0.0876 | 3.3  | 0.20 | 541  | 17  | 527  | 68  | 464  | 363 | 541  | 17 | 117 |
| 81b | 419 | 18,555  | 0.25 | 9.4118  | 0.8  | 2.7373 | 3.0  | 0.1868 | 2.9  | 0.96 | 1104 | 30  | 1339 | 23  | 1736 | 15  | 1736 | 15 | 64  |
| 27  | 301 | 13,325  | 0.19 | 9.1975  | 2.5  | 3.6215 | 6.0  | 0.2416 | 5.5  | 0.91 | 1395 | 69  | 1554 | 48  | 1778 | 45  | 1778 | 45 | 78  |
| 76  | 196 | 6,505   | 0.51 | 9.0307  | 1.0  | 2.6885 | 13.8 | 0.1761 | 13.8 | 1.00 | 1046 | 133 | 1325 | 102 | 1811 | 18  | 1811 | 18 | 58  |
| 26  | 246 | 4,935   | 1.12 | 8.9734  | 0.8  | 3.7094 | 5.4  | 0.2414 | 5.3  | 0.99 | 1394 | 66  | 1573 | 43  | 1823 | 15  | 1823 | 15 | 76  |
| 2   | 146 | 17,222  | 1.37 | 8.9334  | 0.6  | 4.1928 | 4.6  | 0.2717 | 4.6  | 0.99 | 1549 | 63  | 1673 | 38  | 1831 | 11  | 1831 | 11 | 85  |
| 100 | 136 | 39,143  | 0.74 | 8.9038  | 1.3  | 4.3326 | 7.8  | 0.2798 | 7.7  | 0.99 | 1590 | 109 | 1700 | 65  | 1837 | 23  | 1837 | 23 | 87  |
| 98  | 84  | 106,009 | 0.83 | 8.8179  | 0.8  | 4.5735 | 2.6  | 0.2925 | 2.4  | 0.95 | 1654 | 35  | 1744 | 21  | 1855 | 15  | 1855 | 15 | 89  |
| 93  | 81  | 53,567  | 0.86 | 8.7409  | 1.0  | 3.9813 | 4.0  | 0.2524 | 3.9  | 0.97 | 1451 | 50  | 1630 | 32  | 1871 | 18  | 1871 | 18 | 78  |
| 32  | 383 | 129,023 | 0.20 | 8.5403  | 0.3  | 3.9789 | 3.2  | 0.2465 | 3.2  | 1.00 | 1420 | 41  | 1630 | 26  | 1912 | 5   | 1912 | 5  | 74  |
| 70  | 161 | 49,351  | 0.79 | 8.4766  | 0.5  | 4.9853 | 1.8  | 0.3065 | 1.8  | 0.97 | 1723 | 27  | 1817 | 16  | 1926 | 8   | 1926 | 8  | 89  |
| 64  | 141 | 49,033  | 1.45 | 8.4585  | 0.3  | 4.7123 | 4.4  | 0.2891 | 4.4  | 1.00 | 1637 | 63  | 1769 | 37  | 1930 | 6   | 1930 | 6  | 85  |
| 88  | 258 | 99,044  | 0.66 | 8.3729  | 0.4  | 4.4729 | 2.2  | 0.2716 | 2.2  | 0.98 | 1549 | 30  | 1726 | 19  | 1948 | 7   | 1948 | 7  | 80  |
| 81a | 601 | 9,161   | 0.72 | 8.0365  | 0.8  | 2.4539 | 5.3  | 0.1430 | 5.2  | 0.99 | 862  | 42  | 1259 | 38  | 2021 | 15  | 2021 | 15 | 43  |
| 58  | 231 | 38,120  | 0.46 | 7.7516  | 0.8  | 4.0913 | 20.0 | 0.2300 | 20.0 | 1.00 | 1335 | 241 | 1653 | 164 | 2084 | 13  | 2084 | 13 | 64  |
| 59  | 274 | 13,401  | 0.37 | 7.1624  | 1.1  | 5.1235 | 11.0 | 0.2661 | 11.0 | 0.99 | 1521 | 149 | 1840 | 94  | 2222 | 20  | 2222 | 20 | 68  |
| 99  | 301 | 18,185  | 0.58 | 7.0917  | 0.8  | 5.7543 | 3.4  | 0.2960 | 3.3  | 0.97 | 1671 | 49  | 1940 | 30  | 2240 | 14  | 2240 | 14 | 75  |
| 21  | 273 | 103,995 | 0.36 | 6.9062  | 0.5  | 7.3570 | 1.5  | 0.3685 | 1.4  | 0.94 | 2022 | 25  | 2156 | 14  | 2285 | 9   | 2285 | 9  | 88  |
| 92  | 213 | 69,567  | 0.53 | 6.8343  | 0.7  | 7.5627 | 1.6  | 0.3749 | 1.4  | 0.90 | 2052 | 25  | 2180 | 14  | 2303 | 12  | 2303 | 12 | 89  |
| 50  | 203 | 52,481  | 0.54 | 6.7695  | 0.4  | 7.7216 | 1.1  | 0.3791 | 1.0  | 0.94 | 2072 | 18  | 2199 | 9   | 2320 | 6   | 2320 | 6  | 89  |
| 9   | 27  | 33,809  | 2.14 | 6.6628  | 1.4  | 7.8194 | 2.4  | 0.3779 | 2.0  | 0.83 | 2066 | 36  | 2210 | 22  | 2347 | 23  | 2347 | 23 | 88  |
| 74  | 262 | 6,096   | 0.88 | 6.4727  | 1.2  | 6.6222 | 7.7  | 0.3109 | 7.6  | 0.99 | 1745 | 116 | 2062 | 68  | 2396 | 20  | 2396 | 20 | 73  |
| 20  | 90  | 50,335  | 0.37 | 6.4675  | 0.4  | 6.2493 | 5.7  | 0.2931 | 5.7  | 1.00 | 1657 | 83  | 2011 | 50  | 2398 | 7   | 2398 | 7  | 69  |

|    |     |         |      |        |     |         |      |        |      |      |      |     |      |     |      |    |      |    |    |
|----|-----|---------|------|--------|-----|---------|------|--------|------|------|------|-----|------|-----|------|----|------|----|----|
| 86 | 199 | 61,896  | 0.65 | 6.2606 | 0.5 | 7.4717  | 3.7  | 0.3393 | 3.7  | 0.99 | 1883 | 60  | 2170 | 33  | 2453 | 8  | 2453 | 8  | 77 |
| 28 | 298 | 5,220   | 0.30 | 6.0877 | 0.5 | 8.5763  | 2.6  | 0.3787 | 2.5  | 0.98 | 2070 | 45  | 2294 | 24  | 2500 | 9  | 2500 | 9  | 83 |
| 41 | 410 | 151,422 | 0.37 | 6.0409 | 0.2 | 9.0634  | 1.2  | 0.3971 | 1.2  | 0.98 | 2156 | 21  | 2344 | 11  | 2513 | 4  | 2513 | 4  | 86 |
| 56 | 282 | 2,774   | 0.58 | 5.8510 | 4.4 | 6.7387  | 5.9  | 0.2860 | 3.9  | 0.66 | 1621 | 56  | 2078 | 52  | 2567 | 74 | 2567 | 74 | 63 |
| 42 | 303 | 103,436 | 0.33 | 5.8038 | 0.8 | 9.0804  | 5.6  | 0.3822 | 5.5  | 0.99 | 2087 | 99  | 2346 | 51  | 2580 | 13 | 2580 | 13 | 81 |
| 45 | 197 | 5,057   | 0.71 | 5.6788 | 1.5 | 7.8226  | 24.4 | 0.3222 | 24.4 | 1.00 | 1800 | 383 | 2211 | 223 | 2616 | 25 | 2616 | 25 | 69 |
| 6  | 225 | 5,478   | 0.50 | 5.5234 | 1.3 | 6.5536  | 5.4  | 0.2625 | 5.2  | 0.97 | 1503 | 70  | 2053 | 47  | 2662 | 22 | 2662 | 22 | 56 |
| 77 | 107 | 216,123 | 0.87 | 5.4049 | 0.4 | 11.4674 | 6.7  | 0.4495 | 6.7  | 1.00 | 2393 | 134 | 2562 | 63  | 2698 | 7  | 2698 | 7  | 89 |

### Sample 12-08 - St Cyr

UTM: Zone 08V 0619166 6791034

(n=49/104)

|     |      |         |       |         |     |        |     |        |     |      |      |    |      |    |      |    |      |    |     |
|-----|------|---------|-------|---------|-----|--------|-----|--------|-----|------|------|----|------|----|------|----|------|----|-----|
| 30  | 788  | 30,216  | 0.005 | 19.1517 | 2.7 | 0.3004 | 4.8 | 0.0417 | 4.0 | 0.83 | 264  | 10 | 267  | 11 | 295  | 61 | 264  | 10 | NA  |
| 39  | 872  | 398,800 | 0.004 | 19.2018 | 0.7 | 0.3037 | 1.7 | 0.0423 | 1.6 | 0.92 | 267  | 4  | 269  | 4  | 289  | 15 | 267  | 4  | NA  |
| 28  | 1389 | 364,737 | 0.009 | 19.2328 | 0.5 | 0.3075 | 2.1 | 0.0429 | 2.0 | 0.97 | 271  | 5  | 272  | 5  | 285  | 11 | 271  | 5  | NA  |
| 84  | 368  | 66,421  | 0.004 | 19.4809 | 2.6 | 0.3056 | 3.0 | 0.0432 | 1.6 | 0.52 | 272  | 4  | 271  | 7  | 256  | 59 | 272  | 4  | NA  |
| 70  | 310  | 43,170  | 0.006 | 19.1518 | 1.8 | 0.3122 | 2.7 | 0.0434 | 2.0 | 0.74 | 274  | 5  | 276  | 7  | 295  | 42 | 274  | 5  | NA  |
| 20  | 368  | 109,514 | 0.004 | 19.3183 | 2.4 | 0.3131 | 3.1 | 0.0439 | 2.0 | 0.65 | 277  | 6  | 277  | 8  | 275  | 54 | 277  | 6  | NA  |
| 34  | 1149 | 127,936 | 0.007 | 19.2509 | 1.0 | 0.3190 | 2.3 | 0.0445 | 2.1 | 0.90 | 281  | 6  | 281  | 6  | 283  | 24 | 281  | 6  | NA  |
| 98  | 204  | 35,501  | 0.39  | 19.0787 | 2.9 | 0.3709 | 4.2 | 0.0513 | 3.1 | 0.72 | 323  | 10 | 320  | 12 | 304  | 67 | 323  | 10 | NA  |
| 73  | 252  | 51,131  | 0.52  | 18.7829 | 2.2 | 0.3872 | 2.3 | 0.0527 | 0.9 | 0.37 | 331  | 3  | 332  | 7  | 339  | 49 | 331  | 3  | NA  |
| 67  | 228  | 27,199  | 0.56  | 18.7784 | 2.2 | 0.3893 | 2.8 | 0.0530 | 1.8 | 0.64 | 333  | 6  | 334  | 8  | 340  | 49 | 333  | 6  | NA  |
| 8   | 733  | 562,922 | 0.05  | 18.6827 | 0.8 | 0.3922 | 1.0 | 0.0531 | 0.6 | 0.63 | 334  | 2  | 336  | 3  | 351  | 17 | 334  | 2  | NA  |
| 26b | 1188 | 9,927   | 0.04  | 18.4616 | 1.6 | 0.3971 | 1.8 | 0.0532 | 0.8 | 0.43 | 334  | 3  | 340  | 5  | 378  | 37 | 334  | 3  | NA  |
| 74  | 491  | 102,198 | 0.02  | 18.6823 | 1.1 | 0.3962 | 1.6 | 0.0537 | 1.1 | 0.74 | 337  | 4  | 339  | 4  | 351  | 24 | 337  | 4  | NA  |
| 62  | 378  | 159,472 | 0.11  | 18.6599 | 1.4 | 0.4019 | 1.7 | 0.0544 | 1.1 | 0.61 | 341  | 3  | 343  | 5  | 354  | 31 | 341  | 3  | NA  |
| 37  | 525  | 130,338 | 0.32  | 18.8181 | 1.1 | 0.3996 | 1.4 | 0.0545 | 0.9 | 0.62 | 342  | 3  | 341  | 4  | 335  | 25 | 342  | 3  | NA  |
| 76  | 977  | 50,857  | 0.38  | 18.5749 | 0.9 | 0.4112 | 1.9 | 0.0554 | 1.7 | 0.88 | 348  | 6  | 350  | 6  | 364  | 21 | 348  | 6  | NA  |
| 25  | 910  | 718,937 | 0.14  | 18.7081 | 0.6 | 0.4094 | 1.0 | 0.0555 | 0.8 | 0.81 | 348  | 3  | 348  | 3  | 348  | 13 | 348  | 3  | NA  |
| 99  | 1127 | 8,230   | 0.06  | 18.2896 | 2.0 | 0.4260 | 2.3 | 0.0565 | 1.2 | 0.51 | 354  | 4  | 360  | 7  | 399  | 44 | 354  | 4  | NA  |
| 13  | 669  | 264,731 | 0.36  | 18.5055 | 0.9 | 0.4259 | 1.6 | 0.0572 | 1.3 | 0.84 | 358  | 5  | 360  | 5  | 373  | 19 | 358  | 5  | NA  |
| 36  | 954  | 164,004 | 0.52  | 18.6493 | 0.5 | 0.4241 | 0.7 | 0.0574 | 0.4 | 0.65 | 360  | 1  | 359  | 2  | 355  | 11 | 360  | 1  | NA  |
| 93  | 307  | 161,455 | 0.03  | 18.2946 | 2.3 | 0.4421 | 2.9 | 0.0587 | 1.7 | 0.61 | 367  | 6  | 372  | 9  | 398  | 51 | 367  | 6  | NA  |
| 94  | 1038 | 165,678 | 0.03  | 18.5322 | 1.9 | 0.4374 | 2.4 | 0.0588 | 1.5 | 0.62 | 368  | 5  | 368  | 8  | 369  | 43 | 368  | 5  | NA  |
| 49a | 931  | 345,232 | 0.03  | 18.4490 | 0.6 | 0.4563 | 2.3 | 0.0611 | 2.2 | 0.96 | 382  | 8  | 382  | 7  | 379  | 14 | 382  | 8  | NA  |
| 15  | 297  | 106,536 | 0.58  | 18.0752 | 1.0 | 0.5176 | 4.1 | 0.0679 | 3.9 | 0.97 | 423  | 16 | 424  | 14 | 425  | 22 | 423  | 16 | 100 |
| 87b | 535  | 203,606 | 0.23  | 16.9686 | 0.7 | 0.7480 | 1.1 | 0.0921 | 0.8 | 0.75 | 568  | 4  | 567  | 5  | 565  | 16 | 568  | 4  | 101 |
| 79  | 482  | 291,569 | 0.31  | 16.2821 | 0.6 | 0.8568 | 1.4 | 0.1012 | 1.3 | 0.91 | 621  | 8  | 628  | 7  | 654  | 13 | 621  | 8  | 95  |
| 41  | 165  | 202,364 | 0.15  | 14.1680 | 1.1 | 1.4498 | 1.6 | 0.1490 | 1.2 | 0.77 | 895  | 10 | 910  | 10 | 945  | 22 | 945  | 22 | 95  |
| 19  | 234  | 254,851 | 0.06  | 14.1031 | 0.6 | 1.5705 | 1.0 | 0.1606 | 0.8 | 0.81 | 960  | 7  | 959  | 6  | 955  | 12 | 955  | 12 | 101 |
| 22  | 183  | 128,461 | 0.21  | 13.5672 | 0.5 | 1.7128 | 1.1 | 0.1685 | 0.9 | 0.87 | 1004 | 9  | 1013 | 7  | 1033 | 11 | 1033 | 11 | 97  |

|     |     |         |      |         |     |         |      |        |      |      |      |     |      |     |      |    |      |    |     |
|-----|-----|---------|------|---------|-----|---------|------|--------|------|------|------|-----|------|-----|------|----|------|----|-----|
| 75  | 291 | 797,687 | 0.13 | 12.5986 | 0.5 | 2.0426  | 1.4  | 0.1866 | 1.3  | 0.94 | 1103 | 14  | 1130 | 10  | 1181 | 10 | 1181 | 10 | 93  |
| 95  | 218 | 424,859 | 0.78 | 11.6901 | 0.5 | 2.7636  | 1.7  | 0.2343 | 1.7  | 0.96 | 1357 | 20  | 1346 | 13  | 1328 | 9  | 1328 | 9  | 102 |
| 72  | 219 | 254,675 | 0.40 | 11.4790 | 1.0 | 2.8953  | 3.0  | 0.2410 | 2.8  | 0.94 | 1392 | 35  | 1381 | 22  | 1363 | 19 | 1363 | 19 | 102 |
| 18  | 119 | 26,164  | 0.64 | 10.6452 | 1.2 | 3.3128  | 1.3  | 0.2558 | 0.6  | 0.46 | 1468 | 8   | 1484 | 10  | 1507 | 22 | 1507 | 22 | 97  |
| 92  | 284 | 773,114 | 0.32 | 9.9653  | 0.2 | 3.8019  | 1.3  | 0.2748 | 1.3  | 0.99 | 1565 | 18  | 1593 | 11  | 1631 | 4  | 1631 | 4  | 96  |
| 9   | 98  | 166,226 | 0.16 | 9.9337  | 0.8 | 3.9827  | 1.1  | 0.2869 | 0.7  | 0.68 | 1626 | 10  | 1631 | 9   | 1636 | 14 | 1636 | 14 | 99  |
| 24  | 46  | 76,185  | 0.85 | 9.9195  | 1.4 | 4.0727  | 1.9  | 0.2930 | 1.4  | 0.72 | 1657 | 20  | 1649 | 16  | 1639 | 25 | 1639 | 25 | 101 |
| 7   | 104 | 133,091 | 1.09 | 9.8928  | 0.6 | 3.9946  | 2.2  | 0.2866 | 2.1  | 0.96 | 1625 | 30  | 1633 | 18  | 1644 | 12 | 1644 | 12 | 99  |
| 89  | 157 | 235,580 | 0.49 | 9.3274  | 0.4 | 4.4643  | 1.3  | 0.3020 | 1.2  | 0.96 | 1701 | 18  | 1724 | 10  | 1753 | 7  | 1753 | 7  | 97  |
| 31  | 112 | 204,954 | 0.68 | 9.2315  | 0.5 | 4.4849  | 1.8  | 0.3003 | 1.7  | 0.97 | 1693 | 26  | 1728 | 15  | 1771 | 8  | 1771 | 8  | 96  |
| 80  | 98  | 180,036 | 0.83 | 9.1501  | 0.7 | 4.6502  | 1.6  | 0.3086 | 1.4  | 0.89 | 1734 | 21  | 1758 | 13  | 1788 | 13 | 1788 | 13 | 97  |
| 87a | 135 | 504,180 | 0.38 | 8.8940  | 0.3 | 5.0408  | 1.1  | 0.3252 | 1.1  | 0.97 | 1815 | 17  | 1826 | 10  | 1839 | 5  | 1839 | 5  | 99  |
| 26a | 170 | 162,592 | 0.63 | 8.8231  | 0.3 | 4.7266  | 11.1 | 0.3025 | 11.1 | 1.00 | 1704 | 166 | 1772 | 93  | 1854 | 5  | 1854 | 5  | 92  |
| 61  | 52  | 92,619  | 1.21 | 8.7446  | 1.0 | 5.2949  | 2.1  | 0.3358 | 1.8  | 0.89 | 1866 | 30  | 1868 | 18  | 1870 | 17 | 1870 | 17 | 100 |
| 5   | 138 | 598,592 | 0.91 | 8.7427  | 0.6 | 5.0448  | 3.1  | 0.3199 | 3.0  | 0.98 | 1789 | 47  | 1827 | 26  | 1870 | 10 | 1870 | 10 | 96  |
| 96  | 150 | 221,881 | 0.47 | 8.1461  | 0.7 | 6.6469  | 13.3 | 0.3927 | 13.3 | 1.00 | 2135 | 242 | 2066 | 118 | 1997 | 13 | 1997 | 13 | 107 |
| 64  | 285 | 149,836 | 0.18 | 6.1424  | 0.9 | 10.0155 | 9.9  | 0.4462 | 9.8  | 1.00 | 2378 | 196 | 2436 | 91  | 2485 | 15 | 2485 | 15 | 96  |
| 33  | 180 | 138,334 | 0.45 | 5.9511  | 1.0 | 10.1910 | 3.1  | 0.4399 | 2.9  | 0.95 | 2350 | 57  | 2452 | 28  | 2538 | 17 | 2538 | 17 | 93  |
| 6   | 265 | 623,712 | 0.10 | 5.0885  | 0.1 | 13.7461 | 1.3  | 0.5073 | 1.3  | 1.00 | 2645 | 28  | 2732 | 12  | 2798 | 1  | 2798 | 1  | 95  |
| 23  | 54  | 115,206 | 1.00 | 4.8644  | 0.3 | 14.3493 | 1.4  | 0.5062 | 1.4  | 0.98 | 2641 | 30  | 2773 | 14  | 2871 | 5  | 2871 | 5  | 92  |

**Rejected analyses**

|     |     |         |      |         |      |        |      |        |      |      |      |     |      |     |      |     |      |     |     |
|-----|-----|---------|------|---------|------|--------|------|--------|------|------|------|-----|------|-----|------|-----|------|-----|-----|
| 82  | 15  | 1,956   | 0.51 | 16.0180 | 23.5 | 0.4696 | 24.4 | 0.0546 | 6.5  | 0.27 | 342  | 22  | 391  | 79  | 689  | 508 | 342  | 22  | NA  |
| 66  | 769 | 11,138  | 0.07 | 17.5518 | 5.6  | 0.4356 | 7.9  | 0.0554 | 5.5  | 0.70 | 348  | 19  | 367  | 24  | 491  | 124 | 348  | 19  | NA  |
| 63  | 636 | 65,658  | 0.04 | 18.0539 | 1.1  | 0.4296 | 1.5  | 0.0562 | 1.1  | 0.70 | 353  | 4   | 363  | 5   | 428  | 24  | 353  | 4   | NA  |
| 16  | 413 | 141,673 | 0.07 | 15.1261 | 1.3  | 0.5857 | 1.5  | 0.0642 | 0.7  | 0.48 | 401  | 3   | 468  | 6   | 810  | 27  | 401  | 3   | 50  |
| 4   | 377 | 115,278 | 0.10 | 17.0863 | 1.0  | 0.5199 | 2.2  | 0.0644 | 2.0  | 0.90 | 402  | 8   | 425  | 8   | 550  | 21  | 402  | 8   | 73  |
| 100 | 620 | 5,019   | 0.16 | 13.4644 | 2.5  | 0.7243 | 3.9  | 0.0707 | 3.0  | 0.77 | 441  | 13  | 553  | 16  | 1049 | 50  | 441  | 13  | 42  |
| 42  | 415 | 134,347 | 0.46 | 18.2699 | 0.7  | 0.5503 | 2.6  | 0.0729 | 2.5  | 0.96 | 454  | 11  | 445  | 9   | 401  | 17  | 454  | 11  | 113 |
| 78  | 239 | 24,633  | 0.14 | 17.0422 | 5.4  | 0.6734 | 7.7  | 0.0832 | 5.5  | 0.72 | 515  | 27  | 523  | 32  | 555  | 117 | 515  | 27  | 93  |
| 32  | 433 | 75,974  | 0.18 | 15.3148 | 1.1  | 0.8761 | 3.7  | 0.0973 | 3.5  | 0.95 | 599  | 20  | 639  | 18  | 784  | 24  | 599  | 20  | 76  |
| 52  | 330 | 77,980  | 0.15 | 12.9542 | 3.3  | 1.0967 | 11.1 | 0.1030 | 10.6 | 0.95 | 632  | 64  | 752  | 59  | 1126 | 66  | 632  | 64  | 56  |
| 85  | 134 | 78,379  | 0.18 | 13.7329 | 2.4  | 1.0353 | 4.3  | 0.1031 | 3.6  | 0.82 | 633  | 21  | 722  | 22  | 1009 | 49  | 633  | 21  | 63  |
| 49b | 253 | 9,127   | 0.17 | 14.0836 | 2.6  | 1.1077 | 21.8 | 0.1131 | 21.6 | 0.99 | 691  | 142 | 757  | 117 | 958  | 53  | 691  | 142 | 72  |
| 55  | 174 | 144,521 | 0.27 | 13.7841 | 1.2  | 1.2099 | 7.7  | 0.1210 | 7.6  | 0.99 | 736  | 53  | 805  | 43  | 1001 | 25  | 736  | 53  | 74  |
| 91  | 19  | 8,526   | 1.02 | 13.7491 | 7.8  | 1.5415 | 12.9 | 0.1537 | 10.2 | 0.79 | 922  | 88  | 947  | 79  | 1006 | 159 | 1006 | 159 | 92  |
| 17  | 29  | 36,437  | 0.42 | 13.2136 | 3.4  | 1.8581 | 3.6  | 0.1781 | 1.2  | 0.33 | 1056 | 11  | 1066 | 23  | 1087 | 67  | 1087 | 67  | 97  |
| 46  | 608 | 76,263  | 0.23 | 13.2086 | 3.3  | 1.5398 | 8.5  | 0.1475 | 7.8  | 0.92 | 887  | 64  | 946  | 52  | 1087 | 67  | 1087 | 67  | 82  |
| 50  | 141 | 63,208  | 0.21 | 13.0337 | 1.8  | 1.4340 | 3.8  | 0.1356 | 3.3  | 0.87 | 819  | 25  | 903  | 23  | 1114 | 37  | 1114 | 37  | 74  |
| 3   | 541 | 7,506   | 0.38 | 12.1968 | 3.1  | 1.3653 | 5.4  | 0.1208 | 4.5  | 0.82 | 735  | 31  | 874  | 32  | 1245 | 60  | 1245 | 60  | 59  |
| 81  | 240 | 95,682  | 0.12 | 12.1779 | 1.8  | 1.2123 | 6.4  | 0.1071 | 6.1  | 0.96 | 656  | 38  | 806  | 35  | 1248 | 36  | 1248 | 36  | 53  |



|    |     |           |      |         |     |        |      |        |      |      |      |     |      |     |      |     |      |     |    |
|----|-----|-----------|------|---------|-----|--------|------|--------|------|------|------|-----|------|-----|------|-----|------|-----|----|
| 44 | 367 | 84,722    | 0.37 | 12.1099 | 7.5 | 1.2603 | 9.5  | 0.1107 | 5.8  | 0.61 | 677  | 37  | 828  | 54  | 1259 | 146 | 1259 | 146 | 54 |
| 47 | 353 | 189,749   | 0.14 | 12.0546 | 1.8 | 1.3034 | 3.4  | 0.1140 | 2.9  | 0.85 | 696  | 19  | 847  | 20  | 1268 | 36  | 1268 | 36  | 55 |
| 54 | 372 | 70,139    | 0.08 | 12.0000 | 5.8 | 1.5159 | 6.2  | 0.1319 | 2.0  | 0.33 | 799  | 15  | 937  | 38  | 1277 | 114 | 1277 | 114 | 63 |
| 1  | 534 | 905,437   | 0.10 | 11.5810 | 4.2 | 1.2278 | 4.3  | 0.1031 | 1.3  | 0.29 | 633  | 8   | 813  | 24  | 1346 | 80  | 1346 | 80  | 47 |
| 11 | 159 | 135,440   | 0.30 | 11.4952 | 0.8 | 1.4570 | 3.2  | 0.1215 | 3.1  | 0.97 | 739  | 22  | 913  | 19  | 1360 | 16  | 1360 | 16  | 54 |
| 65 | 707 | 1,264,866 | 0.27 | 11.3149 | 0.8 | 2.4863 | 3.1  | 0.2040 | 3.0  | 0.96 | 1197 | 32  | 1268 | 22  | 1391 | 16  | 1391 | 16  | 86 |
| 51 | 443 | 64,969    | 0.14 | 11.2649 | 1.2 | 1.4304 | 5.6  | 0.1169 | 5.5  | 0.98 | 712  | 37  | 902  | 34  | 1399 | 24  | 1399 | 24  | 51 |
| 35 | 211 | 143,211   | 0.28 | 11.2532 | 1.4 | 2.3069 | 13.0 | 0.1883 | 13.0 | 0.99 | 1112 | 133 | 1214 | 93  | 1401 | 26  | 1401 | 26  | 79 |
| 45 | 351 | 202,160   | 0.14 | 11.2487 | 0.8 | 1.2742 | 2.7  | 0.1040 | 2.6  | 0.95 | 638  | 16  | 834  | 15  | 1402 | 16  | 1402 | 16  | 45 |
| 43 | 371 | 106,985   | 0.14 | 10.0928 | 4.7 | 3.5495 | 7.1  | 0.2598 | 5.3  | 0.75 | 1489 | 71  | 1538 | 56  | 1607 | 87  | 1607 | 87  | 93 |
| 59 | 411 | 191,604   | 0.34 | 9.9177  | 0.5 | 2.7410 | 5.8  | 0.1972 | 5.7  | 1.00 | 1160 | 61  | 1340 | 43  | 1639 | 9   | 1639 | 9   | 71 |
| 38 | 285 | 262,131   | 0.58 | 9.8292  | 2.6 | 3.4389 | 4.6  | 0.2452 | 3.8  | 0.82 | 1413 | 48  | 1513 | 36  | 1656 | 49  | 1656 | 49  | 85 |
| 10 | 491 | 117,808   | 0.45 | 9.8242  | 4.2 | 2.6859 | 6.3  | 0.1914 | 4.6  | 0.74 | 1129 | 48  | 1325 | 46  | 1657 | 79  | 1657 | 79  | 68 |
| 90 | 316 | 80,577    | 0.61 | 9.3467  | 1.1 | 2.7940 | 6.1  | 0.1894 | 6.0  | 0.98 | 1118 | 62  | 1354 | 46  | 1749 | 21  | 1749 | 21  | 64 |
| 83 | 356 | 10,738    | 0.37 | 9.2847  | 2.1 | 2.3148 | 5.7  | 0.1559 | 5.3  | 0.93 | 934  | 46  | 1217 | 40  | 1761 | 38  | 1761 | 38  | 53 |
| 53 | 271 | 60,115    | 0.22 | 9.2791  | 1.8 | 2.5478 | 3.3  | 0.1715 | 2.7  | 0.83 | 1020 | 26  | 1286 | 24  | 1762 | 33  | 1762 | 33  | 58 |
| 88 | 452 | 146,503   | 0.04 | 9.2661  | 1.9 | 2.5789 | 3.3  | 0.1733 | 2.6  | 0.80 | 1030 | 25  | 1295 | 24  | 1765 | 35  | 1765 | 35  | 58 |
| 2  | 459 | 20,358    | 0.29 | 8.9873  | 1.6 | 2.1768 | 4.5  | 0.1419 | 4.2  | 0.93 | 855  | 34  | 1174 | 31  | 1820 | 29  | 1820 | 29  | 47 |
| 68 | 118 | 139,991   | 0.59 | 8.8880  | 0.7 | 4.4982 | 2.1  | 0.2900 | 2.0  | 0.95 | 1641 | 29  | 1731 | 18  | 1840 | 12  | 1840 | 12  | 89 |
| 14 | 154 | 25,746    | 0.62 | 8.2331  | 0.8 | 3.8740 | 5.2  | 0.2313 | 5.2  | 0.99 | 1341 | 63  | 1608 | 42  | 1978 | 14  | 1978 | 14  | 68 |
| 29 | 564 | 130,915   | 0.16 | 8.2124  | 7.9 | 2.1804 | 8.5  | 0.1299 | 3.2  | 0.38 | 787  | 24  | 1175 | 59  | 1982 | 141 | 1982 | 141 | 40 |
| 69 | 177 | 119,131   | 0.33 | 7.4303  | 1.8 | 3.7093 | 13.7 | 0.1999 | 13.6 | 0.99 | 1175 | 146 | 1573 | 110 | 2159 | 32  | 2159 | 32  | 54 |
| 27 | 290 | 364,749   | 0.13 | 7.3817  | 0.6 | 2.3497 | 3.9  | 0.1258 | 3.8  | 0.99 | 764  | 27  | 1227 | 28  | 2170 | 11  | 2170 | 11  | 35 |
| 21 | 331 | 138,307   | 0.58 | 7.1319  | 1.6 | 6.4849 | 16.1 | 0.3354 | 16.1 | 1.00 | 1865 | 260 | 2044 | 143 | 2230 | 27  | 2230 | 27  | 84 |
| 77 | 48  | 23,992    | 0.10 | 6.7296  | 2.4 | 2.2807 | 11.5 | 0.1113 | 11.3 | 0.98 | 680  | 73  | 1206 | 82  | 2330 | 42  | 2330 | 42  | 29 |
| 58 | 569 | 149,062   | 0.23 | 6.7010  | 0.5 | 4.0683 | 4.4  | 0.1977 | 4.4  | 0.99 | 1163 | 46  | 1648 | 36  | 2337 | 9   | 2337 | 9   | 50 |
| 57 | 167 | 149,903   | 0.19 | 6.5079  | 0.8 | 5.1922 | 7.7  | 0.2451 | 7.6  | 0.99 | 1413 | 97  | 1851 | 65  | 2387 | 13  | 2387 | 13  | 59 |
| 12 | 138 | 333,300   | 0.78 | 6.0336  | 0.5 | 6.7090 | 5.4  | 0.2936 | 5.4  | 1.00 | 1659 | 79  | 2074 | 48  | 2515 | 8   | 2515 | 8   | 66 |
| 86 | 277 | 218,176   | 0.43 | 5.6609  | 2.4 | 5.8681 | 6.2  | 0.2409 | 5.7  | 0.92 | 1392 | 72  | 1957 | 54  | 2622 | 41  | 2622 | 41  | 53 |

# **Sample 11-93 - St Cyr**

UTM: Zone 08V 0626547 6781336

(n=36/101)

|    |      |         |       |         |     |        |     |        |     |      |     |   |     |   |     |    |     |   |    |
|----|------|---------|-------|---------|-----|--------|-----|--------|-----|------|-----|---|-----|---|-----|----|-----|---|----|
| 4  | 1623 | 42,780  | 0.017 | 19.2493 | 2.2 | 0.2997 | 3.9 | 0.0418 | 3.2 | 0.82 | 264 | 8 | 266 | 9 | 283 | 51 | 264 | 8 | NA |
| 18 | 1852 | 135,920 | 0.003 | 19.2924 | 1.4 | 0.3040 | 2.1 | 0.0425 | 1.6 | 0.75 | 269 | 4 | 270 | 5 | 278 | 32 | 269 | 4 | NA |
| 39 | 1756 | 68,535  | 0.004 | 19.4414 | 2.0 | 0.3039 | 2.3 | 0.0428 | 1.1 | 0.46 | 270 | 3 | 269 | 5 | 260 | 47 | 270 | 3 | NA |
| 9  | 1749 | 195,126 | 0.005 | 19.2019 | 1.7 | 0.3081 | 2.5 | 0.0429 | 1.8 | 0.73 | 271 | 5 | 273 | 6 | 289 | 38 | 271 | 5 | NA |
| 11 | 2885 | 129,797 | 0.004 | 19.0042 | 1.6 | 0.3121 | 2.6 | 0.0430 | 2.1 | 0.80 | 272 | 6 | 276 | 6 | 312 | 36 | 272 | 6 | NA |
| 93 | 1512 | 16,128  | 0.004 | 19.0439 | 1.2 | 0.3126 | 2.1 | 0.0432 | 1.7 | 0.81 | 272 | 4 | 276 | 5 | 308 | 28 | 272 | 4 | NA |
| 91 | 2179 | 30,924  | 0.004 | 19.2065 | 0.9 | 0.3121 | 1.6 | 0.0435 | 1.4 | 0.84 | 274 | 4 | 276 | 4 | 288 | 20 | 274 | 4 | NA |
| 69 | 2489 | 57,038  | 0.008 | 19.1960 | 1.3 | 0.3138 | 3.1 | 0.0437 | 2.9 | 0.92 | 276 | 8 | 277 | 8 | 290 | 29 | 276 | 8 | NA |

|    |      |         |       |         |     |        |     |        |     |      |      |    |      |    |      |    |      |    |     |
|----|------|---------|-------|---------|-----|--------|-----|--------|-----|------|------|----|------|----|------|----|------|----|-----|
| 24 | 2432 | 61,222  | 0.004 | 19.2677 | 0.9 | 0.3135 | 2.2 | 0.0438 | 2.0 | 0.91 | 276  | 5  | 277  | 5  | 281  | 20 | 276  | 5  | NA  |
| 90 | 1369 | 105,237 | 0.004 | 19.1343 | 2.4 | 0.3166 | 3.3 | 0.0439 | 2.3 | 0.69 | 277  | 6  | 279  | 8  | 297  | 55 | 277  | 6  | NA  |
| 62 | 1830 | 96,835  | 0.005 | 19.0876 | 1.6 | 0.3177 | 2.9 | 0.0440 | 2.4 | 0.83 | 277  | 7  | 280  | 7  | 302  | 37 | 277  | 7  | NA  |
| 47 | 1583 | 58,510  | 0.009 | 19.0947 | 2.0 | 0.3192 | 5.1 | 0.0442 | 4.7 | 0.92 | 279  | 13 | 281  | 13 | 302  | 45 | 279  | 13 | NA  |
| 68 | 2640 | 60,839  | 0.004 | 19.0553 | 1.1 | 0.3211 | 3.4 | 0.0444 | 3.3 | 0.95 | 280  | 9  | 283  | 8  | 306  | 24 | 280  | 9  | NA  |
| 12 | 1622 | 201,006 | 0.05  | 18.6193 | 1.2 | 0.3965 | 3.7 | 0.0535 | 3.5 | 0.95 | 336  | 12 | 339  | 11 | 359  | 27 | 336  | 12 | NA  |
| 36 | 1312 | 122,258 | 0.14  | 18.4258 | 1.3 | 0.4758 | 4.6 | 0.0636 | 4.4 | 0.96 | 397  | 17 | 395  | 15 | 382  | 30 | 397  | 17 | NA  |
| 85 | 1230 | 72,781  | 0.70  | 18.0159 | 1.7 | 0.5087 | 4.3 | 0.0665 | 3.9 | 0.92 | 415  | 16 | 418  | 15 | 433  | 37 | 415  | 16 | 96  |
| 5  | 836  | 162,304 | 0.58  | 18.2257 | 1.3 | 0.5439 | 2.7 | 0.0719 | 2.3 | 0.86 | 448  | 10 | 441  | 10 | 407  | 30 | 448  | 10 | 110 |
| 99 | 217  | 39,845  | 1.02  | 15.7886 | 3.1 | 0.9373 | 4.1 | 0.1073 | 2.7 | 0.66 | 657  | 17 | 671  | 20 | 720  | 66 | 657  | 17 | 91  |
| 80 | 123  | 9,333   | 0.39  | 13.2721 | 2.3 | 1.7546 | 3.0 | 0.1689 | 1.9 | 0.64 | 1006 | 18 | 1029 | 20 | 1078 | 46 | 1078 | 46 | 93  |
| 6  | 732  | 315,152 | 0.44  | 12.8673 | 0.7 | 2.0430 | 1.2 | 0.1907 | 1.0 | 0.82 | 1125 | 10 | 1130 | 8  | 1140 | 14 | 1140 | 14 | 99  |
| 82 | 91   | 27,071  | 0.41  | 11.7638 | 1.9 | 2.5768 | 3.8 | 0.2198 | 3.3 | 0.86 | 1281 | 38 | 1294 | 28 | 1316 | 37 | 1316 | 37 | 97  |
| 15 | 132  | 29,446  | 0.33  | 11.7266 | 1.9 | 2.5671 | 4.0 | 0.2183 | 3.5 | 0.89 | 1273 | 41 | 1291 | 29 | 1322 | 36 | 1322 | 36 | 96  |
| 55 | 154  | 41,534  | 0.35  | 11.4394 | 1.4 | 2.6192 | 6.0 | 0.2173 | 5.8 | 0.97 | 1268 | 67 | 1306 | 44 | 1370 | 28 | 1370 | 28 | 93  |
| 83 | 138  | 46,404  | 0.26  | 10.8472 | 1.9 | 2.9686 | 7.4 | 0.2335 | 7.2 | 0.97 | 1353 | 88 | 1400 | 56 | 1471 | 36 | 1471 | 36 | 92  |
| 74 | 178  | 44,443  | 0.44  | 10.7124 | 0.9 | 3.1091 | 2.6 | 0.2416 | 2.4 | 0.94 | 1395 | 31 | 1435 | 20 | 1495 | 17 | 1495 | 17 | 93  |
| 60 | 187  | 61,680  | 0.42  | 9.9586  | 1.4 | 3.9226 | 4.6 | 0.2833 | 4.4 | 0.95 | 1608 | 62 | 1618 | 37 | 1632 | 27 | 1632 | 27 | 99  |
| 52 | 114  | 53,233  | 0.70  | 9.8650  | 1.8 | 4.0149 | 2.4 | 0.2873 | 1.6 | 0.67 | 1628 | 23 | 1637 | 19 | 1649 | 33 | 1649 | 33 | 99  |
| 97 | 73   | 22,012  | 0.37  | 9.5220  | 1.7 | 4.3454 | 2.8 | 0.3001 | 2.2 | 0.78 | 1692 | 32 | 1702 | 23 | 1715 | 32 | 1715 | 32 | 99  |
| 96 | 215  | 108,174 | 0.51  | 9.4156  | 1.1 | 4.2707 | 1.6 | 0.2916 | 1.2 | 0.73 | 1650 | 17 | 1688 | 13 | 1735 | 20 | 1735 | 20 | 95  |
| 48 | 378  | 290,859 | 0.32  | 9.3860  | 0.6 | 4.2440 | 4.1 | 0.2889 | 4.0 | 0.99 | 1636 | 58 | 1683 | 34 | 1741 | 12 | 1741 | 12 | 94  |
| 13 | 376  | 125,720 | 0.37  | 9.3603  | 0.6 | 4.4608 | 4.0 | 0.3028 | 4.0 | 0.99 | 1705 | 60 | 1724 | 34 | 1746 | 12 | 1746 | 12 | 98  |
| 29 | 228  | 109,187 | 0.25  | 9.2779  | 0.8 | 4.6676 | 1.3 | 0.3141 | 1.0 | 0.77 | 1761 | 16 | 1761 | 11 | 1762 | 15 | 1762 | 15 | 100 |
| 33 | 879  | 390,962 | 0.09  | 9.0742  | 0.4 | 4.7672 | 4.7 | 0.3137 | 4.7 | 1.00 | 1759 | 72 | 1779 | 40 | 1803 | 8  | 1803 | 8  | 98  |
| 89 | 117  | 77,352  | 0.78  | 8.9278  | 1.3 | 5.0992 | 2.0 | 0.3302 | 1.5 | 0.75 | 1839 | 24 | 1836 | 17 | 1832 | 24 | 1832 | 24 | 100 |
| 50 | 148  | 34,718  | 0.30  | 8.7069  | 1.2 | 4.9124 | 3.4 | 0.3102 | 3.2 | 0.93 | 1742 | 48 | 1804 | 29 | 1878 | 22 | 1878 | 22 | 93  |
| 43 | 82   | 15,288  | 0.88  | 8.6077  | 2.7 | 5.0915 | 3.4 | 0.3179 | 2.1 | 0.62 | 1779 | 33 | 1835 | 29 | 1898 | 48 | 1898 | 48 | 94  |

#### **Rejected analyses**

|    |      |         |       |         |      |         |      |        |      |      |     |    |       |      |      |     |     |    |    |
|----|------|---------|-------|---------|------|---------|------|--------|------|------|-----|----|-------|------|------|-----|-----|----|----|
| 37 | 1277 | 76,463  | 0.01  | 17.5529 | 7.9  | 0.3013  | 12.1 | 0.0384 | 9.2  | 0.76 | 243 | 22 | 267   | 29   | 490  | 174 | 243 | 22 | NA |
| 40 | 1864 | 55,157  | 0.007 | 19.3161 | 1.3  | 0.2987  | 6.6  | 0.0418 | 6.5  | 0.98 | 264 | 17 | 265   | 16   | 275  | 29  | 264 | 17 | NA |
| 17 | 1768 | 19,212  | 0.02  | 17.8767 | 2.3  | 0.3373  | 3.4  | 0.0437 | 2.5  | 0.73 | 276 | 7  | 295   | 9    | 450  | 51  | 276 | 7  | NA |
| 27 | 1549 | 39,629  | 0.04  | 16.4240 | 6.7  | 0.3783  | 10.6 | 0.0451 | 8.2  | 0.77 | 284 | 23 | 326   | 29   | 635  | 145 | 284 | 23 | NA |
| 21 | 1553 | 104,128 | 0.02  | 16.2736 | 1.3  | 0.4298  | 3.2  | 0.0507 | 2.9  | 0.91 | 319 | 9  | 363   | 10   | 655  | 28  | 319 | 9  | NA |
| 7  | 1244 | 23,966  | 0.06  | 12.356  | 4.97 | 0.76965 | 11.4 | 0.0690 | 10.2 | 0.90 | 430 | 43 | 579.6 | 50.3 | 1220 | 98  | 430 | 43 | 65 |
| 44 | 662  | 70,397  | 0.06  | 13.3747 | 4.0  | 0.7509  | 4.6  | 0.0728 | 2.3  | 0.50 | 453 | 10 | 569   | 20   | 1062 | 81  | 453 | 10 | 43 |
| 56 | 1066 | 55,317  | 0.20  | 14.6167 | 2.2  | 0.7005  | 4.2  | 0.0743 | 3.6  | 0.86 | 462 | 16 | 539   | 18   | 881  | 45  | 462 | 16 | 52 |
| 73 | 600  | 73,024  | 0.16  | 12.054  | 4.20 | 0.90428 | 11.8 | 0.0791 | 11.0 | 0.93 | 491 | 52 | 654.0 | 57.0 | 1268 | 82  | 491 | 52 | 61 |
| 34 | 1317 | 50,852  | 0.01  | 14.2888 | 1.6  | 0.8546  | 5.0  | 0.0886 | 4.8  | 0.95 | 547 | 25 | 627   | 24   | 928  | 32  | 547 | 25 | 59 |
| 23 | 747  | 22,865  | 0.31  | 14.217  | 1.69 | 1.40074 | 10.2 | 0.1444 | 10.1 | 0.99 | 870 | 82 | 889.2 | 60.8 | 938  | 35  | 938 | 35 | 7  |

|     |     |         |      |         |      |         |      |        |      |      |      |     |        |      |      |     |      |     |     |
|-----|-----|---------|------|---------|------|---------|------|--------|------|------|------|-----|--------|------|------|-----|------|-----|-----|
| 81  | 132 | 57,801  | 0.56 | 13.5455 | 3.7  | 1.8517  | 4.0  | 0.1819 | 1.3  | 0.33 | 1077 | 13  | 1064   | 26   | 1037 | 75  | 1037 | 75  | 104 |
| 32  | 111 | 12,521  | 1.01 | 13.1571 | 3.0  | 1.4919  | 5.8  | 0.1424 | 5.0  | 0.86 | 858  | 40  | 927    | 35   | 1095 | 59  | 1095 | 59  | 78  |
| 20  | 348 | 1,976   | 0.12 | 12.969  | 2.32 | 1.47004 | 4.5  | 0.1383 | 3.9  | 0.86 | 835  | 30  | 918.1  | 27.4 | 1124 | 46  | 1124 | 46  | 26  |
| 59  | 673 | 112,096 | 0.18 | 12.7963 | 0.8  | 1.6337  | 3.3  | 0.1516 | 3.2  | 0.97 | 910  | 27  | 983    | 21   | 1151 | 16  | 1151 | 16  | 79  |
| 14  | 454 | 88,460  | 0.49 | 12.7258 | 0.8  | 1.8190  | 8.6  | 0.1679 | 8.6  | 1.00 | 1000 | 80  | 1052   | 57   | 1162 | 16  | 1162 | 16  | 86  |
| 54  | 73  | 19,738  | 0.35 | 12.4356 | 3.4  | 2.1794  | 3.6  | 0.1966 | 1.4  | 0.39 | 1157 | 15  | 1174   | 25   | 1207 | 66  | 1207 | 66  | 96  |
| 100 | 37  | 10,287  | 0.49 | 12.208  | #### | 2.38635 | 11.0 | 0.2113 | 3.0  | 0.27 | 1236 | 34  | 1238.5 | 79.2 | 1244 | 209 | 1244 | 209 | 1   |
| 8   | 551 | 14,961  | 0.36 | 12.1537 | 1.8  | 2.0069  | 8.6  | 0.1769 | 8.4  | 0.98 | 1050 | 81  | 1118   | 58   | 1252 | 35  | 1252 | 35  | 84  |
| 77  | 169 | 11,563  | 0.30 | 11.6458 | 2.4  | 1.9049  | 6.0  | 0.1609 | 5.5  | 0.91 | 962  | 49  | 1083   | 40   | 1335 | 47  | 1335 | 47  | 72  |
| 31  | 363 | 5,281   | 0.18 | 11.620  | 1.46 | 1.50482 | 2.9  | 0.1268 | 2.5  | 0.86 | 770  | 18  | 932.3  | 17.7 | 1339 | 28  | 1339 | 28  | 43  |
| 30  | 545 | 47,306  | 0.74 | 11.286  | 4.13 | 1.80048 | 8.6  | 0.1474 | 7.6  | 0.88 | 886  | 63  | 1045.6 | 56.5 | 1396 | 79  | 1396 | 79  | 36  |
| 65  | 109 | 13,598  | 0.93 | 10.196  | 1.65 | 3.14801 | 10.1 | 0.2328 | 10.0 | 0.99 | 1349 | 122 | 1444.5 | 78.3 | 1588 | 31  | 1588 | 31  | 15  |
| 63  | 832 | 268,294 | 0.37 | 10.0855 | 0.8  | 3.3090  | 9.7  | 0.2420 | 9.6  | 1.00 | 1397 | 121 | 1483   | 75   | 1608 | 14  | 1608 | 14  | 87  |
| 35  | 118 | 30,965  | 1.09 | 9.9097  | 2.1  | 3.3073  | 5.3  | 0.2377 | 4.9  | 0.92 | 1375 | 60  | 1483   | 41   | 1641 | 38  | 1641 | 38  | 84  |
| 64  | 292 | 46,125  | 0.27 | 9.5522  | 1.4  | 2.9890  | 3.3  | 0.2071 | 2.9  | 0.90 | 1213 | 32  | 1405   | 25   | 1709 | 27  | 1709 | 27  | 71  |
| 57  | 424 | 86,639  | 0.17 | 9.2294  | 1.2  | 3.5632  | 8.6  | 0.2385 | 8.5  | 0.99 | 1379 | 105 | 1541   | 68   | 1772 | 22  | 1772 | 22  | 78  |
| 79  | 172 | 75,145  | 0.27 | 8.8371  | 1.0  | 4.3096  | 7.3  | 0.2762 | 7.2  | 0.99 | 1572 | 101 | 1695   | 60   | 1851 | 18  | 1851 | 18  | 85  |
| 45  | 550 | 90,103  | 0.09 | 8.6685  | 0.6  | 3.6760  | 5.0  | 0.2311 | 5.0  | 0.99 | 1340 | 60  | 1566   | 40   | 1886 | 11  | 1886 | 11  | 71  |
| 94  | 95  | 80,054  | 0.45 | 5.0103  | 1.4  | 13.0798 | 9.1  | 0.4753 | 9.0  | 0.99 | 2507 | 188 | 2685   | 86   | 2823 | 23  | 2823 | 23  | 89  |

# Sample 12-25 - St Cyr

UTM: Zone 08V 0615803 6792365

(n=38/88)

|    |      |         |       |         |      |        |      |        |     |      |     |    |     |    |     |     |     |    |    |
|----|------|---------|-------|---------|------|--------|------|--------|-----|------|-----|----|-----|----|-----|-----|-----|----|----|
| 40 | 1072 | 58,569  | 0.005 | 18.9722 | 0.8  | 0.3302 | 1.4  | 0.0454 | 1.1 | 0.82 | 286 | 3  | 290 | 3  | 316 | 18  | 286 | 3  | NA |
| 64 | 1319 | 288,750 | 0.005 | 19.1564 | 0.7  | 0.3381 | 1.7  | 0.0470 | 1.6 | 0.91 | 296 | 5  | 296 | 4  | 294 | 17  | 296 | 5  | NA |
| 66 | 607  | 61,625  | 0.005 | 18.5703 | 1.9  | 0.3686 | 2.4  | 0.0496 | 1.6 | 0.65 | 312 | 5  | 319 | 7  | 365 | 42  | 312 | 5  | NA |
| 45 | 1547 | 7,345   | 0.030 | 17.3599 | 11.6 | 0.3955 | 12.1 | 0.0498 | 3.4 | 0.28 | 313 | 10 | 338 | 35 | 515 | 255 | 313 | 10 | NA |
| 85 | 944  | 108,511 | 0.02  | 18.7614 | 1.1  | 0.3776 | 1.5  | 0.0514 | 1.0 | 0.67 | 323 | 3  | 325 | 4  | 342 | 25  | 323 | 3  | NA |
| 55 | 458  | 87,574  | 0.015 | 18.6756 | 1.2  | 0.3871 | 1.6  | 0.0524 | 1.1 | 0.65 | 329 | 3  | 332 | 5  | 352 | 28  | 329 | 3  | NA |
| 72 | 2646 | 29,685  | 0.055 | 18.6386 | 0.4  | 0.3891 | 1.1  | 0.0526 | 1.0 | 0.94 | 330 | 3  | 334 | 3  | 356 | 8   | 330 | 3  | NA |
| 29 | 837  | 56,502  | 0.015 | 18.6096 | 1.0  | 0.3913 | 2.2  | 0.0528 | 1.9 | 0.88 | 332 | 6  | 335 | 6  | 360 | 23  | 332 | 6  | NA |
| 62 | 741  | 200,498 | 0.009 | 18.6062 | 0.6  | 0.3939 | 2.1  | 0.0532 | 2.0 | 0.96 | 334 | 6  | 337 | 6  | 360 | 13  | 334 | 6  | NA |
| 11 | 992  | 222,792 | 0.008 | 18.8021 | 0.8  | 0.3903 | 1.2  | 0.0532 | 0.8 | 0.71 | 334 | 3  | 335 | 3  | 337 | 19  | 334 | 3  | NA |
| 30 | 810  | 331,264 | 0.008 | 18.7481 | 1.0  | 0.3943 | 1.2  | 0.0536 | 0.7 | 0.60 | 337 | 2  | 337 | 4  | 343 | 22  | 337 | 2  | NA |
| 88 | 947  | 51,635  | 0.007 | 18.6621 | 0.9  | 0.3982 | 1.1  | 0.0539 | 0.7 | 0.62 | 338 | 2  | 340 | 3  | 354 | 20  | 338 | 2  | NA |
| 56 | 740  | 135,177 | 0.010 | 18.7063 | 0.6  | 0.3983 | 1.5  | 0.0540 | 1.4 | 0.91 | 339 | 4  | 340 | 4  | 348 | 14  | 339 | 4  | NA |
| 65 | 1025 | 203,201 | 0.023 | 18.5770 | 0.6  | 0.4013 | 1.0  | 0.0541 | 0.8 | 0.80 | 339 | 3  | 343 | 3  | 364 | 14  | 339 | 3  | NA |
| 26 | 801  | 3,275   | 0.038 | 17.5803 | 8.5  | 0.4249 | 8.6  | 0.0542 | 1.4 | 0.16 | 340 | 5  | 360 | 26 | 487 | 187 | 340 | 5  | NA |
| 9  | 1108 | 12,892  | 0.013 | 18.0734 | 4.9  | 0.4148 | 5.0  | 0.0544 | 0.8 | 0.16 | 341 | 3  | 352 | 15 | 426 | 110 | 341 | 3  | NA |
| 70 | 712  | 103,669 | 0.020 | 18.5729 | 0.9  | 0.4079 | 2.0  | 0.0549 | 1.8 | 0.89 | 345 | 6  | 347 | 6  | 364 | 21  | 345 | 6  | NA |
| 81 | 741  | 130,927 | 0.013 | 18.5919 | 0.9  | 0.4089 | 1.6  | 0.0551 | 1.4 | 0.83 | 346 | 5  | 348 | 5  | 362 | 21  | 346 | 5  | NA |

|    |     |           |       |         |     |         |     |        |     |      |      |     |      |    |      |    |      |    |     |
|----|-----|-----------|-------|---------|-----|---------|-----|--------|-----|------|------|-----|------|----|------|----|------|----|-----|
| 76 | 493 | 141,097   | 0.017 | 18.4511 | 2.0 | 0.4152  | 2.3 | 0.0556 | 1.1 | 0.50 | 349  | 4   | 353  | 7  | 379  | 44 | 349  | 4  | NA  |
| 77 | 882 | 38,191    | 0.050 | 18.3644 | 1.2 | 0.4198  | 1.4 | 0.0559 | 0.6 | 0.45 | 351  | 2   | 356  | 4  | 390  | 27 | 351  | 2  | NA  |
| 87 | 596 | 37,258    | 0.01  | 18.4703 | 1.4 | 0.4178  | 2.0 | 0.0560 | 1.4 | 0.72 | 351  | 5   | 354  | 6  | 377  | 31 | 351  | 5  | NA  |
| 58 | 701 | 129,006   | 0.28  | 18.5835 | 0.8 | 0.4450  | 2.3 | 0.0600 | 2.2 | 0.94 | 376  | 8   | 374  | 7  | 363  | 17 | 376  | 8  | NA  |
| 49 | 467 | 240,612   | 0.34  | 18.1185 | 0.9 | 0.4712  | 1.9 | 0.0619 | 1.7 | 0.88 | 387  | 6   | 392  | 6  | 420  | 20 | 387  | 6  | NA  |
| 33 | 375 | 124,319   | 0.95  | 18.2132 | 1.3 | 0.5199  | 3.3 | 0.0687 | 3.1 | 0.92 | 428  | 13  | 425  | 12 | 408  | 29 | 428  | 13 | 105 |
| 6  | 272 | 369,659   | 0.67  | 15.8146 | 1.3 | 1.0529  | 2.2 | 0.1208 | 1.8 | 0.81 | 735  | 12  | 730  | 11 | 716  | 27 | 735  | 12 | 103 |
| 46 | 576 | 118,192   | 0.34  | 13.5042 | 0.6 | 1.6508  | 3.2 | 0.1617 | 3.1 | 0.98 | 966  | 28  | 990  | 20 | 1043 | 12 | 1043 | 12 | 93  |
| 38 | 575 | 104,536   | 0.44  | 13.4658 | 0.3 | 1.6193  | 1.1 | 0.1581 | 1.0 | 0.96 | 946  | 9   | 978  | 7  | 1049 | 6  | 1049 | 6  | 90  |
| 2  | 213 | 203,937   | 0.63  | 13.1854 | 0.8 | 1.8651  | 1.6 | 0.1784 | 1.4 | 0.87 | 1058 | 14  | 1069 | 11 | 1091 | 16 | 1091 | 16 | 97  |
| 5  | 53  | 63,291    | 0.28  | 12.6732 | 1.8 | 2.1376  | 2.6 | 0.1965 | 1.9 | 0.73 | 1156 | 20  | 1161 | 18 | 1170 | 36 | 1170 | 36 | 99  |
| 19 | 319 | 238,712   | 0.75  | 10.7432 | 0.6 | 3.1845  | 4.7 | 0.2481 | 4.6 | 0.99 | 1429 | 60  | 1453 | 36 | 1490 | 10 | 1490 | 10 | 96  |
| 21 | 63  | 71,552    | 0.95  | 9.9641  | 0.7 | 3.9180  | 2.0 | 0.2831 | 1.9 | 0.94 | 1607 | 27  | 1617 | 16 | 1631 | 13 | 1631 | 13 | 99  |
| 27 | 402 | 1,005,245 | 0.55  | 9.6170  | 0.5 | 3.8491  | 2.2 | 0.2685 | 2.2 | 0.97 | 1533 | 29  | 1603 | 18 | 1696 | 10 | 1696 | 10 | 90  |
| 67 | 354 | 203,665   | 0.32  | 9.4778  | 0.7 | 4.5611  | 6.7 | 0.3135 | 6.6 | 0.99 | 1758 | 102 | 1742 | 56 | 1723 | 14 | 1723 | 14 | 102 |
| 82 | 370 | 699,067   | 0.46  | 9.2783  | 0.2 | 4.5966  | 1.1 | 0.3093 | 1.1 | 0.98 | 1737 | 17  | 1749 | 9  | 1762 | 4  | 1762 | 4  | 99  |
| 73 | 75  | 89,466    | 0.50  | 9.1131  | 0.8 | 4.8183  | 2.1 | 0.3185 | 1.9 | 0.93 | 1782 | 30  | 1788 | 18 | 1795 | 14 | 1795 | 14 | 99  |
| 28 | 321 | 627,512   | 0.32  | 9.0976  | 0.2 | 4.7813  | 0.7 | 0.3155 | 0.6 | 0.94 | 1768 | 10  | 1782 | 6  | 1798 | 4  | 1798 | 4  | 98  |
| 14 | 49  | 93,766    | 0.86  | 6.8126  | 1.3 | 9.0849  | 7.7 | 0.4489 | 7.6 | 0.98 | 2390 | 152 | 2347 | 71 | 2309 | 23 | 2309 | 23 | 104 |
| 86 | 55  | 309,997   | 0.59  | 4.5604  | 0.2 | 17.3780 | 1.3 | 0.5748 | 1.3 | 0.98 | 2927 | 30  | 2956 | 13 | 2975 | 4  | 2975 | 4  | 98  |

**Rejected analyses**

|    |      |         |      |         |     |        |     |        |     |      |     |    |     |    |      |     |     |    |    |
|----|------|---------|------|---------|-----|--------|-----|--------|-----|------|-----|----|-----|----|------|-----|-----|----|----|
| 69 | 750  | 341,680 | 0.04 | 15.2489 | 8.5 | 0.4720 | 9.3 | 0.0522 | 3.7 | 0.40 | 328 | 12 | 393 | 30 | 793  | 179 | 328 | 12 | NA |
| 23 | 1237 | 12,143  | 0.01 | 18.5260 | 3.7 | 0.3941 | 3.8 | 0.0530 | 0.9 | 0.23 | 333 | 3  | 337 | 11 | 370  | 84  | 333 | 3  | NA |
| 32 | 889  | 392,020 | 0.02 | 18.4999 | 0.6 | 0.3954 | 1.1 | 0.0530 | 1.0 | 0.85 | 333 | 3  | 338 | 3  | 373  | 13  | 333 | 3  | NA |
| 80 | 1339 | 14,484  | 0.03 | 18.3047 | 1.3 | 0.4027 | 4.3 | 0.0535 | 4.1 | 0.95 | 336 | 14 | 344 | 13 | 397  | 29  | 336 | 14 | NA |
| 43 | 651  | 33,933  | 0.05 | 16.6480 | 2.5 | 0.4453 | 4.5 | 0.0538 | 3.7 | 0.82 | 338 | 12 | 374 | 14 | 606  | 55  | 338 | 12 | NA |
| 83 | 1013 | 398,544 | 0.02 | 18.0792 | 0.9 | 0.4287 | 1.6 | 0.0562 | 1.4 | 0.84 | 353 | 5  | 362 | 5  | 425  | 20  | 353 | 5  | NA |
| 78 | 680  | 193,796 | 0.01 | 18.0461 | 1.2 | 0.4396 | 1.6 | 0.0575 | 1.0 | 0.65 | 361 | 4  | 370 | 5  | 429  | 27  | 361 | 4  | NA |
| 44 | 1011 | 28,164  | 0.04 | 17.1283 | 1.3 | 0.4726 | 2.3 | 0.0587 | 1.8 | 0.82 | 368 | 7  | 393 | 7  | 544  | 29  | 368 | 7  | NA |
| 71 | 506  | 123,816 | 0.02 | 17.9401 | 1.4 | 0.4523 | 1.5 | 0.0588 | 0.5 | 0.34 | 369 | 2  | 379 | 5  | 442  | 32  | 369 | 2  | NA |
| 18 | 980  | 252,256 | 0.04 | 16.6086 | 1.1 | 0.4924 | 1.6 | 0.0593 | 1.3 | 0.77 | 371 | 5  | 407 | 5  | 611  | 23  | 371 | 5  | NA |
| 59 | 653  | 123,824 | 0.05 | 17.6632 | 1.3 | 0.4709 | 1.8 | 0.0603 | 1.2 | 0.66 | 378 | 4  | 392 | 6  | 477  | 30  | 378 | 4  | NA |
| 75 | 721  | 87,685  | 0.02 | 15.9292 | 5.7 | 0.5480 | 5.9 | 0.0633 | 1.3 | 0.22 | 396 | 5  | 444 | 21 | 701  | 122 | 396 | 5  | NA |
| 22 | 1055 | 22,464  | 0.07 | 17.1660 | 0.7 | 0.5231 | 1.9 | 0.0651 | 1.8 | 0.92 | 407 | 7  | 427 | 7  | 539  | 16  | 407 | 7  | 75 |
| 35 | 833  | 9,358   | 0.18 | 11.9872 | 5.4 | 0.7560 | 7.9 | 0.0657 | 5.8 | 0.73 | 410 | 23 | 572 | 35 | 1279 | 106 | 410 | 23 | 32 |
| 37 | 650  | 282,574 | 0.03 | 16.8776 | 2.6 | 0.5628 | 3.7 | 0.0689 | 2.7 | 0.73 | 429 | 11 | 453 | 14 | 576  | 56  | 429 | 11 | 75 |
| 61 | 503  | 97,300  | 0.04 | 13.3910 | 1.9 | 0.7122 | 3.1 | 0.0692 | 2.5 | 0.80 | 431 | 10 | 546 | 13 | 1060 | 38  | 431 | 10 | 41 |
| 3  | 816  | 124,292 | 0.06 | 15.9183 | 2.4 | 0.6024 | 3.3 | 0.0696 | 2.3 | 0.68 | 433 | 9  | 479 | 13 | 702  | 52  | 433 | 9  | 62 |
| 48 | 840  | 45,429  | 0.06 | 12.9011 | 1.7 | 0.7803 | 2.4 | 0.0730 | 1.8 | 0.73 | 454 | 8  | 586 | 11 | 1134 | 33  | 454 | 8  | 40 |
| 68 | 361  | 82,066  | 0.06 | 16.4256 | 2.2 | 0.6251 | 2.4 | 0.0745 | 1.0 | 0.43 | 463 | 5  | 493 | 10 | 635  | 47  | 463 | 5  | 73 |

|    |      |         |      |         |     |        |      |        |      |      |      |     |      |     |      |     |      |    |    |
|----|------|---------|------|---------|-----|--------|------|--------|------|------|------|-----|------|-----|------|-----|------|----|----|
| 4  | 487  | 229,000 | 0.04 | 13.1192 | 1.2 | 0.8237 | 2.3  | 0.0784 | 2.0  | 0.86 | 486  | 9   | 610  | 11  | 1101 | 24  | 486  | 9  | 44 |
| 1  | 834  | 95,217  | 0.02 | 15.9925 | 8.2 | 0.6778 | 11.3 | 0.0786 | 7.8  | 0.69 | 488  | 37  | 525  | 47  | 692  | 175 | 488  | 37 | 70 |
| 36 | 650  | 103,935 | 0.01 | 15.2445 | 1.3 | 0.7232 | 3.7  | 0.0800 | 3.5  | 0.94 | 496  | 17  | 553  | 16  | 794  | 27  | 496  | 17 | 62 |
| 39 | 619  | 145,837 | 0.06 | 16.5777 | 2.1 | 0.6691 | 3.1  | 0.0804 | 2.3  | 0.73 | 499  | 11  | 520  | 13  | 615  | 46  | 499  | 11 | 81 |
| 50 | 865  | 37,990  | 0.08 | 14.6036 | 1.4 | 0.7994 | 3.2  | 0.0847 | 2.8  | 0.89 | 524  | 14  | 597  | 14  | 883  | 30  | 524  | 14 | 59 |
| 13 | 414  | 235,163 | 0.21 | 14.6632 | 2.2 | 0.8664 | 5.0  | 0.0921 | 4.5  | 0.90 | 568  | 24  | 634  | 23  | 875  | 45  | 568  | 24 | 65 |
| 10 | 560  | 51,447  | 0.24 | 13.2896 | 5.4 | 1.0666 | 6.9  | 0.1028 | 4.3  | 0.63 | 631  | 26  | 737  | 36  | 1075 | 109 | 631  | 26 | 59 |
| 12 | 81   | 69,447  | 0.27 | 12.8615 | 2.8 | 1.4412 | 5.3  | 0.1344 | 4.5  | 0.85 | 813  | 35  | 906  | 32  | 1141 | 56  | 1141 | 56 | 71 |
| 31 | 297  | 218,467 | 0.78 | 12.7840 | 0.6 | 1.4408 | 2.7  | 0.1336 | 2.6  | 0.97 | 808  | 20  | 906  | 16  | 1153 | 12  | 1153 | 12 | 70 |
| 53 | 1179 | 86,998  | 0.34 | 12.5463 | 0.5 | 1.6379 | 1.9  | 0.1490 | 1.9  | 0.97 | 896  | 16  | 985  | 12  | 1190 | 10  | 1190 | 10 | 75 |
| 24 | 280  | 160,246 | 0.23 | 12.4506 | 1.0 | 1.2866 | 3.7  | 0.1162 | 3.6  | 0.96 | 709  | 24  | 840  | 21  | 1205 | 20  | 1205 | 20 | 59 |
| 8  | 420  | 88,870  | 0.23 | 11.9540 | 1.1 | 1.3680 | 5.9  | 0.1186 | 5.8  | 0.98 | 723  | 40  | 875  | 35  | 1285 | 22  | 1285 | 22 | 56 |
| 79 | 100  | 106,956 | 0.31 | 11.8735 | 2.2 | 1.9408 | 9.3  | 0.1671 | 9.1  | 0.97 | 996  | 84  | 1095 | 63  | 1298 | 42  | 1298 | 42 | 77 |
| 51 | 107  | 231,186 | 1.71 | 11.8065 | 0.7 | 2.2696 | 3.5  | 0.1943 | 3.4  | 0.98 | 1145 | 36  | 1203 | 25  | 1309 | 14  | 1309 | 14 | 87 |
| 42 | 271  | 196,343 | 0.74 | 11.2355 | 0.8 | 2.3089 | 3.4  | 0.1881 | 3.3  | 0.97 | 1111 | 34  | 1215 | 24  | 1404 | 16  | 1404 | 16 | 79 |
| 74 | 578  | 79,792  | 0.14 | 11.0083 | 4.5 | 0.9880 | 9.1  | 0.0789 | 7.8  | 0.87 | 489  | 37  | 698  | 46  | 1443 | 86  | 1443 | 86 | 34 |
| 16 | 220  | 101,602 | 0.20 | 10.5269 | 3.5 | 2.1131 | 17.0 | 0.1613 | 16.7 | 0.98 | 964  | 149 | 1153 | 118 | 1528 | 65  | 1528 | 65 | 63 |
| 15 | 370  | 40,416  | 0.30 | 10.2850 | 0.6 | 2.0744 | 3.7  | 0.1547 | 3.7  | 0.99 | 927  | 32  | 1140 | 25  | 1572 | 12  | 1572 | 12 | 59 |
| 52 | 373  | 214,938 | 0.28 | 10.2491 | 1.4 | 2.0365 | 3.5  | 0.1514 | 3.2  | 0.92 | 909  | 27  | 1128 | 24  | 1578 | 26  | 1578 | 26 | 58 |
| 54 | 242  | 38,445  | 0.31 | 9.9566  | 4.2 | 1.9295 | 6.5  | 0.1393 | 5.0  | 0.76 | 841  | 39  | 1091 | 44  | 1632 | 79  | 1632 | 79 | 52 |
| 84 | 242  | 31,903  | 0.20 | 9.9215  | 0.6 | 2.1220 | 4.2  | 0.1527 | 4.2  | 0.99 | 916  | 36  | 1156 | 29  | 1639 | 11  | 1639 | 11 | 56 |
| 34 | 87   | 58,911  | 0.50 | 9.6694  | 0.9 | 3.3454 | 4.7  | 0.2346 | 4.7  | 0.98 | 1359 | 57  | 1492 | 37  | 1686 | 16  | 1686 | 16 | 81 |
| 60 | 552  | 42,119  | 0.41 | 9.6077  | 1.7 | 2.4239 | 4.2  | 0.1689 | 3.8  | 0.92 | 1006 | 36  | 1250 | 30  | 1698 | 30  | 1698 | 30 | 59 |
| 25 | 23   | 11,746  | 0.86 | 8.9803  | 4.4 | 3.6133 | 27.0 | 0.2353 | 26.6 | 0.99 | 1362 | 327 | 1552 | 218 | 1822 | 80  | 1822 | 80 | 75 |
| 57 | 492  | 110,321 | 0.16 | 8.5494  | 1.2 | 1.8787 | 8.4  | 0.1165 | 8.3  | 0.99 | 710  | 56  | 1074 | 56  | 1910 | 21  | 1910 | 21 | 37 |
| 20 | 32   | 79,749  | 1.25 | 8.2350  | 1.4 | 4.9111 | 4.4  | 0.2933 | 4.2  | 0.95 | 1658 | 61  | 1804 | 37  | 1977 | 25  | 1977 | 25 | 84 |
| 63 | 504  | 328,340 | 0.09 | 7.1864  | 3.2 | 2.9316 | 4.1  | 0.1528 | 2.7  | 0.64 | 917  | 23  | 1390 | 31  | 2217 | 55  | 2217 | 55 | 41 |
| 7  | 124  | 127,716 | 0.14 | 6.3500  | 1.8 | 2.9958 | 4.9  | 0.1380 | 4.5  | 0.93 | 833  | 36  | 1407 | 37  | 2429 | 31  | 2429 | 31 | 34 |
| 41 | 280  | 215,166 | 0.25 | 5.4448  | 1.4 | 9.2406 | 6.1  | 0.3649 | 5.9  | 0.97 | 2005 | 102 | 2362 | 56  | 2686 | 23  | 2686 | 23 | 75 |

# **Sample 12-22 - St Cyr**

UTM: Zone 08V 0618848 6790004

(n=65/106)

|    |      |         |        |         |      |        |      |        |     |      |     |   |     |    |     |     |     |   |    |
|----|------|---------|--------|---------|------|--------|------|--------|-----|------|-----|---|-----|----|-----|-----|-----|---|----|
| 22 | 42   | 17,140  |        | 21.0637 | 22.6 | 0.2701 | 22.8 | 0.0413 | 2.7 | 0.12 | 261 | 7 | 243 | 49 | 73  | 543 | 261 | 7 | NA |
| 18 | 460  | 14,524  | 0.012  | 19.1357 | 2.3  | 0.3099 | 3.5  | 0.0430 | 2.6 | 0.75 | 271 | 7 | 274 | 8  | 297 | 53  | 271 | 7 | NA |
| 61 | 1613 | 419,673 | 0.005  | 19.2132 | 0.4  | 0.3099 | 1.0  | 0.0432 | 0.9 | 0.91 | 273 | 2 | 274 | 2  | 288 | 9   | 273 | 2 | NA |
| 33 | 170  | 43,906  | 0.0001 | 19.8454 | 4.1  | 0.3017 | 4.2  | 0.0434 | 1.0 | 0.23 | 274 | 3 | 268 | 10 | 213 | 94  | 274 | 3 | NA |
| 38 | 1322 | 39,147  | 0.010  | 19.0274 | 0.7  | 0.3228 | 1.2  | 0.0445 | 0.9 | 0.80 | 281 | 3 | 284 | 3  | 310 | 16  | 281 | 3 | NA |
| 31 | 1080 | 285,194 | 0.005  | 19.1258 | 0.6  | 0.3267 | 2.1  | 0.0453 | 2.0 | 0.96 | 286 | 6 | 287 | 5  | 298 | 14  | 286 | 6 | NA |
| 13 | 1115 | 370,326 | 0.004  | 18.9455 | 1.0  | 0.3372 | 1.2  | 0.0463 | 0.7 | 0.55 | 292 | 2 | 295 | 3  | 320 | 23  | 292 | 2 | NA |
| 32 | 975  | 59,947  | 0.013  | 19.0121 | 1.4  | 0.3554 | 1.8  | 0.0490 | 1.1 | 0.59 | 308 | 3 | 309 | 5  | 311 | 33  | 308 | 3 | NA |

|      |      |         |       |         |     |        |      |        |      |      |      |     |      |     |      |     |      |    |     |
|------|------|---------|-------|---------|-----|--------|------|--------|------|------|------|-----|------|-----|------|-----|------|----|-----|
| 34   | 1292 | 174,730 | 0.005 | 18.6460 | 0.7 | 0.4004 | 1.0  | 0.0541 | 0.7  | 0.73 | 340  | 2   | 342  | 3   | 356  | 15  | 340  | 2  | NA  |
| 11   | 469  | 15,126  | 0.03  | 17.0618 | 5.5 | 0.4564 | 6.0  | 0.0565 | 2.4  | 0.40 | 354  | 8   | 382  | 19  | 553  | 120 | 354  | 8  | NA  |
| 6    | 541  | 168,836 | 0.75  | 18.3731 | 0.8 | 0.4305 | 2.2  | 0.0574 | 2.0  | 0.94 | 360  | 7   | 364  | 7   | 389  | 17  | 360  | 7  | NA  |
| 57   | 97   | 39,480  | 1.11  | 18.1288 | 4.7 | 0.5259 | 5.4  | 0.0691 | 2.6  | 0.48 | 431  | 11  | 429  | 19  | 419  | 105 | 431  | 11 | 103 |
| 68   | 258  | 109,242 | 0.20  | 18.1238 | 1.5 | 0.5406 | 3.0  | 0.0711 | 2.6  | 0.86 | 443  | 11  | 439  | 11  | 419  | 33  | 443  | 11 | 106 |
| 3    | 216  | 149,503 | 1.31  | 17.5569 | 1.9 | 0.5656 | 2.4  | 0.0720 | 1.6  | 0.65 | 448  | 7   | 455  | 9   | 490  | 41  | 448  | 7  | 92  |
| 21   | 47   | 33,154  | 0.79  | 16.5259 | 6.5 | 0.6903 | 6.8  | 0.0827 | 1.9  | 0.28 | 512  | 9   | 533  | 28  | 622  | 141 | 512  | 9  | 82  |
| 19-1 | 63   | 28,958  | 0.62  | 16.1186 | 3.9 | 0.9208 | 4.3  | 0.1076 | 2.0  | 0.46 | 659  | 13  | 663  | 21  | 675  | 82  | 659  | 13 | 98  |
| 96   | 269  | 122,159 | 1.67  | 16.0926 | 0.9 | 0.9685 | 2.8  | 0.1130 | 2.7  | 0.95 | 690  | 17  | 688  | 14  | 679  | 19  | 690  | 17 | 102 |
| 92   | 63   | 44,562  | 0.56  | 13.5770 | 2.2 | 1.8038 | 4.0  | 0.1776 | 3.4  | 0.83 | 1054 | 33  | 1047 | 26  | 1032 | 45  | 1032 | 45 | 102 |
| 94   | 227  | 227,482 | 0.43  | 13.5770 | 1.2 | 1.7366 | 2.6  | 0.1710 | 2.3  | 0.89 | 1018 | 22  | 1022 | 17  | 1032 | 24  | 1032 | 24 | 99  |
| 98   | 428  | 243,094 | 0.26  | 13.4444 | 0.3 | 1.6315 | 2.4  | 0.1591 | 2.3  | 0.99 | 952  | 21  | 982  | 15  | 1052 | 5   | 1052 | 5  | 90  |
| 88   | 113  | 249,153 | 0.52  | 13.2660 | 1.4 | 1.9207 | 1.6  | 0.1848 | 0.7  | 0.42 | 1093 | 7   | 1088 | 10  | 1079 | 28  | 1079 | 28 | 101 |
| 66   | 314  | 319,409 | 0.30  | 13.2358 | 0.4 | 1.7326 | 1.8  | 0.1663 | 1.8  | 0.97 | 992  | 16  | 1021 | 12  | 1083 | 8   | 1083 | 8  | 92  |
| 76   | 42   | 30,259  | 0.37  | 13.1617 | 2.6 | 1.9911 | 2.8  | 0.1901 | 1.1  | 0.38 | 1122 | 11  | 1112 | 19  | 1095 | 52  | 1095 | 52 | 102 |
| 30   | 85   | 55,321  | 0.95  | 13.1541 | 1.1 | 1.8797 | 1.7  | 0.1793 | 1.2  | 0.74 | 1063 | 12  | 1074 | 11  | 1096 | 22  | 1096 | 22 | 97  |
| 36b  | 124  | 137,487 | 0.46  | 13.1462 | 1.1 | 1.9560 | 1.2  | 0.1865 | 0.6  | 0.46 | 1102 | 6   | 1101 | 8   | 1097 | 22  | 1097 | 22 | 101 |
| 72   | 111  | 191,116 | 0.53  | 12.5087 | 1.7 | 2.2432 | 2.1  | 0.2035 | 1.2  | 0.55 | 1194 | 13  | 1195 | 15  | 1196 | 34  | 1196 | 34 | 100 |
| 93   | 116  | 91,686  | 1.35  | 12.3819 | 0.8 | 2.1240 | 1.7  | 0.1907 | 1.5  | 0.87 | 1125 | 15  | 1157 | 12  | 1216 | 17  | 1216 | 17 | 93  |
| 25   | 51   | 104,848 | 0.64  | 11.6713 | 1.7 | 2.7266 | 3.6  | 0.2308 | 3.1  | 0.87 | 1339 | 38  | 1336 | 27  | 1331 | 34  | 1331 | 34 | 101 |
| 5    | 335  | 161,041 | 0.55  | 11.6513 | 0.3 | 2.7124 | 0.9  | 0.2292 | 0.9  | 0.96 | 1330 | 10  | 1332 | 7   | 1334 | 5   | 1334 | 5  | 100 |
| 44   | 138  | 402,842 | 0.65  | 11.5412 | 0.5 | 2.7496 | 0.8  | 0.2302 | 0.7  | 0.81 | 1335 | 8   | 1342 | 6   | 1353 | 9   | 1353 | 9  | 99  |
| 100  | 88   | 65,887  | 0.47  | 11.4365 | 0.9 | 2.8136 | 1.3  | 0.2334 | 1.0  | 0.75 | 1352 | 12  | 1359 | 10  | 1370 | 16  | 1370 | 16 | 99  |
| 91   | 99   | 129,974 | 0.64  | 11.3654 | 1.3 | 2.8454 | 5.5  | 0.2345 | 5.3  | 0.97 | 1358 | 65  | 1368 | 41  | 1382 | 24  | 1382 | 24 | 98  |
| 47-3 | 177  | 324,809 | 0.53  | 11.3284 | 0.7 | 2.9112 | 1.4  | 0.2392 | 1.2  | 0.87 | 1382 | 15  | 1385 | 11  | 1388 | 13  | 1388 | 13 | 100 |
| 24   | 58   | 89,788  | 1.07  | 11.3074 | 2.1 | 2.8725 | 2.1  | 0.2356 | 0.3  | 0.14 | 1364 | 4   | 1375 | 16  | 1392 | 41  | 1392 | 41 | 98  |
| 15   | 170  | 154,527 | 0.50  | 11.1858 | 0.4 | 2.9481 | 1.8  | 0.2392 | 1.7  | 0.98 | 1382 | 22  | 1394 | 13  | 1413 | 7   | 1413 | 7  | 98  |
| 70   | 176  | 284,016 | 0.50  | 10.9268 | 0.4 | 3.2447 | 1.4  | 0.2571 | 1.3  | 0.96 | 1475 | 18  | 1468 | 11  | 1457 | 7   | 1457 | 7  | 101 |
| 79   | 117  | 131,149 | 0.62  | 10.7785 | 0.6 | 3.1745 | 2.3  | 0.2482 | 2.2  | 0.97 | 1429 | 28  | 1451 | 17  | 1483 | 11  | 1483 | 11 | 96  |
| 63   | 44   | 90,948  | 0.59  | 10.7724 | 2.7 | 3.3070 | 2.8  | 0.2584 | 0.9  | 0.31 | 1482 | 11  | 1483 | 22  | 1484 | 51  | 1484 | 51 | 100 |
| 69   | 166  | 50,584  | 0.55  | 10.6352 | 0.7 | 3.3742 | 1.3  | 0.2603 | 1.1  | 0.84 | 1491 | 14  | 1498 | 10  | 1509 | 13  | 1509 | 13 | 99  |
| 85   | 43   | 67,369  | 0.57  | 9.9873  | 0.6 | 3.8582 | 6.0  | 0.2795 | 5.9  | 0.99 | 1589 | 84  | 1605 | 48  | 1626 | 11  | 1626 | 11 | 98  |
| 73   | 433  | 60,562  | 1.34  | 9.9659  | 1.0 | 3.6526 | 15.3 | 0.2640 | 15.3 | 1.00 | 1510 | 206 | 1561 | 123 | 1630 | 18  | 1630 | 18 | 93  |
| 67   | 107  | 103,653 | 0.99  | 9.8953  | 0.4 | 3.9089 | 1.5  | 0.2805 | 1.4  | 0.96 | 1594 | 20  | 1616 | 12  | 1644 | 8   | 1644 | 8  | 97  |
| 35   | 314  | 33,137  | 1.13  | 9.8562  | 3.1 | 3.8762 | 3.8  | 0.2771 | 2.2  | 0.59 | 1577 | 31  | 1609 | 31  | 1651 | 57  | 1651 | 57 | 96  |
| 47-2 | 123  | 84,332  | 0.55  | 9.6375  | 0.4 | 4.0320 | 2.7  | 0.2818 | 2.7  | 0.99 | 1601 | 38  | 1641 | 22  | 1692 | 8   | 1692 | 8  | 95  |
| 58   | 154  | 189,892 | 0.50  | 9.3835  | 0.4 | 4.5181 | 1.1  | 0.3075 | 1.0  | 0.91 | 1728 | 15  | 1734 | 9   | 1742 | 8   | 1742 | 8  | 99  |
| 51   | 180  | 326,137 | 0.40  | 9.3510  | 1.4 | 4.5558 | 2.6  | 0.3090 | 2.2  | 0.85 | 1736 | 33  | 1741 | 21  | 1748 | 25  | 1748 | 25 | 99  |
| 84   | 478  | 127,277 | 0.37  | 9.2073  | 0.4 | 4.4656 | 2.0  | 0.2982 | 1.9  | 0.98 | 1682 | 28  | 1725 | 16  | 1776 | 8   | 1776 | 8  | 95  |
| 77   | 168  | 522,830 | 0.71  | 9.1866  | 0.3 | 4.6596 | 0.8  | 0.3105 | 0.7  | 0.91 | 1743 | 11  | 1760 | 6   | 1780 | 6   | 1780 | 6  | 98  |
| 40   | 20   | 33,086  | 0.67  | 8.9215  | 1.9 | 5.1515 | 3.2  | 0.3333 | 2.6  | 0.80 | 1854 | 42  | 1845 | 28  | 1834 | 35  | 1834 | 35 | 101 |



|    |     |         |      |        |     |         |     |        |      |      |      |     |      |     |      |    |      |    |     |
|----|-----|---------|------|--------|-----|---------|-----|--------|------|------|------|-----|------|-----|------|----|------|----|-----|
| 1  | 63  | 152,240 | 0.99 | 8.8695 | 0.9 | 5.0678  | 1.3 | 0.3260 | 0.9  | 0.73 | 1819 | 15  | 1831 | 11  | 1844 | 16 | 1844 | 16 | 99  |
| 39 | 125 | 265,969 | 0.50 | 8.8590 | 0.4 | 5.0155  | 2.6 | 0.3223 | 2.6  | 0.99 | 1801 | 40  | 1822 | 22  | 1846 | 7  | 1846 | 7  | 98  |
| 45 | 107 | 127,444 | 0.91 | 8.7620 | 0.5 | 5.0463  | 1.2 | 0.3207 | 1.1  | 0.91 | 1793 | 17  | 1827 | 10  | 1866 | 9  | 1866 | 9  | 96  |
| 90 | 105 | 505,014 | 1.10 | 8.5396 | 0.7 | 5.4538  | 0.9 | 0.3378 | 0.6  | 0.61 | 1876 | 9   | 1893 | 8   | 1912 | 13 | 1912 | 13 | 98  |
| 12 | 52  | 93,653  | 1.57 | 8.5115 | 1.3 | 5.5126  | 1.7 | 0.3403 | 1.1  | 0.64 | 1888 | 18  | 1903 | 15  | 1918 | 24 | 1918 | 24 | 98  |
| 37 | 36  | 65,021  | 1.81 | 8.4347 | 1.5 | 5.5261  | 2.0 | 0.3381 | 1.4  | 0.70 | 1877 | 23  | 1905 | 18  | 1935 | 26 | 1935 | 26 | 97  |
| 26 | 109 | 116,646 | 0.76 | 8.2357 | 0.7 | 5.5030  | 1.8 | 0.3287 | 1.7  | 0.93 | 1832 | 27  | 1901 | 16  | 1977 | 12 | 1977 | 12 | 93  |
| 4  | 272 | 289,764 | 0.45 | 8.2012 | 0.1 | 5.5519  | 1.6 | 0.3302 | 1.6  | 1.00 | 1840 | 26  | 1909 | 14  | 1985 | 3  | 1985 | 3  | 93  |
| 71 | 264 | 488,539 | 0.96 | 8.1798 | 0.2 | 5.8493  | 0.8 | 0.3470 | 0.8  | 0.97 | 1920 | 13  | 1954 | 7   | 1989 | 3  | 1989 | 3  | 97  |
| 81 | 56  | 130,516 | 0.63 | 7.7793 | 0.8 | 7.0187  | 1.9 | 0.3960 | 1.8  | 0.92 | 2151 | 32  | 2114 | 17  | 2078 | 13 | 2078 | 13 | 103 |
| 41 | 46  | 225,451 | 0.50 | 7.2594 | 0.6 | 7.5485  | 2.9 | 0.3974 | 2.9  | 0.98 | 2157 | 52  | 2179 | 26  | 2199 | 11 | 2199 | 11 | 98  |
| 50 | 227 | 521,302 | 0.53 | 6.7742 | 0.2 | 7.9885  | 0.8 | 0.3925 | 0.7  | 0.97 | 2134 | 13  | 2230 | 7   | 2319 | 3  | 2319 | 3  | 92  |
| 87 | 402 | 107,662 | 0.78 | 5.9875 | 3.3 | 10.3474 | 9.5 | 0.4493 | 8.9  | 0.94 | 2392 | 178 | 2466 | 88  | 2528 | 55 | 2528 | 55 | 95  |
| 82 | 138 | 267,640 | 0.71 | 5.5093 | 0.3 | 11.7301 | 1.7 | 0.4687 | 1.6  | 0.98 | 2478 | 34  | 2583 | 16  | 2667 | 5  | 2667 | 5  | 93  |
| 99 | 122 | 289,939 | 0.69 | 5.4253 | 2.2 | 12.8846 | 29  | 0.5070 | 28.6 | 1.00 | 2644 | 623 | 2671 | 277 | 2692 | 36 | 2692 | 36 | 98  |
| 2  | 139 | 477,145 | 1.20 | 5.3885 | 0.1 | 12.3736 | 0.8 | 0.4836 | 0.8  | 0.98 | 2543 | 16  | 2633 | 7   | 2703 | 2  | 2703 | 2  | 94  |

**Rejected analyses**

|      |     |         |       |         |      |        |      |        |      |      |      |    |      |     |      |     |      |     |    |
|------|-----|---------|-------|---------|------|--------|------|--------|------|------|------|----|------|-----|------|-----|------|-----|----|
| 62   | 14  | 1,713   | 0.004 | 2.8733  | 760  | 1.9908 | 760  | 0.0415 | 12.5 | 0.02 | 262  | 32 | 1112 | -   | 3698 | 160 | 262  | 32  | NA |
| 86   | 49  | 9,226   | 0.001 | 21.5228 | 21   | 0.2732 | 22   | 0.0426 | 5.6  | 0.26 | 269  | 15 | 245  | 47  | 22   | 504 | 269  | 15  | NA |
| 19-2 | 7   | 1,719   | 0.001 | 0.7154  | 2586 | 8.3274 | 2586 | 0.0432 | 11.6 | 0.00 | 273  | 31 | 2267 | -   | -    | -   | 273  | 31  | NA |
| 28   | 7   | 796     | 0.12  | 5.1858  | 471  | 1.2132 | 472  | 0.0456 | 17.0 | 0.04 | 288  | 48 | 807  | -   | 2766 | 405 | 288  | 48  | NA |
| 83   | 613 | 250,238 | 0.008 | 18.5965 | 1.7  | 0.3438 | 2.9  | 0.0464 | 2.4  | 0.82 | 292  | 7  | 300  | 8   | 362  | 37  | 292  | 7   | NA |
| 36   | 12  | 3,036   | 0.001 | 11.1720 | 25   | 0.5887 | 28   | 0.0477 | 12.7 | 0.45 | 300  | 37 | 470  | 107 | 1415 | 491 | 300  | 37  | NA |
| 78   | 84  | 29,004  | 0.03  | 14.5990 | 5.4  | 0.5448 | 6.3  | 0.0577 | 3.2  | 0.50 | 362  | 11 | 442  | 23  | 884  | 113 | 362  | 11  | NA |
| 7    | 146 | 7,386   | 1.09  | 17.1610 | 7.2  | 0.5756 | 12   | 0.0716 | 9.4  | 0.80 | 446  | 41 | 462  | 44  | 540  | 157 | 446  | 41  | 83 |
| 8    | 306 | 132,506 | 0.22  | 14.0673 | 1.2  | 1.0887 | 4.4  | 0.1111 | 4.2  | 0.96 | 679  | 27 | 748  | 23  | 960  | 25  | 679  | 27  | 71 |
| 95   | 207 | 144,194 | 0.21  | 13.0729 | 1.0  | 1.1826 | 8.8  | 0.1121 | 8.7  | 0.99 | 685  | 57 | 793  | 48  | 1108 | 19  | 685  | 57  | 62 |
| 27   | 166 | 85,736  | 0.21  | 13.6443 | 1.4  | 1.4286 | 2.8  | 0.1414 | 2.4  | 0.87 | 852  | 19 | 901  | 17  | 1022 | 27  | 1022 | 27  | 83 |
| 65   | 115 | 79,050  | 0.19  | 12.0039 | 7.5  | 2.1931 | 12   | 0.1909 | 9.1  | 0.77 | 1126 | 94 | 1179 | 82  | 1276 | 147 | 1276 | 147 | 88 |
| 52   | 109 | 8,248   | 0.41  | 11.8898 | 1.9  | 1.9168 | 4.5  | 0.1653 | 4.1  | 0.91 | 986  | 38 | 1087 | 30  | 1295 | 36  | 1295 | 36  | 76 |
| 53-3 | 546 | 10,193  | 0.83  | 11.2223 | 0.7  | 1.7070 | 7.0  | 0.1389 | 7.0  | 0.99 | 839  | 55 | 1011 | 45  | 1406 | 14  | 1406 | 14  | 60 |
| 10   | 85  | 150,565 | 0.38  | 11.1431 | 2.1  | 2.1083 | 5.7  | 0.1704 | 5.3  | 0.93 | 1014 | 49 | 1152 | 39  | 1420 | 40  | 1420 | 40  | 71 |
| 89   | 14  | 16,526  | 1.51  | 10.9384 | 8.2  | 3.0278 | 8.5  | 0.2402 | 2.1  | 0.25 | 1388 | 26 | 1415 | 65  | 1455 | 157 | 1455 | 157 | 95 |
| 43   | 257 | 59,950  | 0.13  | 10.6921 | 2.7  | 1.4941 | 12.7 | 0.1159 | 12.4 | 0.98 | 707  | 83 | 928  | 78  | 1499 | 51  | 1499 | 51  | 47 |
| 56   | 258 | 59,477  | 0.24  | 10.6651 | 3.1  | 1.8387 | 6.9  | 0.1422 | 6.2  | 0.90 | 857  | 50 | 1059 | 46  | 1503 | 58  | 1503 | 58  | 57 |
| 23   | 355 | 259,477 | 0.41  | 10.2841 | 2.4  | 1.4653 | 6.3  | 0.1093 | 5.9  | 0.93 | 669  | 37 | 916  | 38  | 1572 | 45  | 1572 | 45  | 43 |
| 74   | 348 | 161,138 | 0.29  | 10.2819 | 2.5  | 2.8141 | 9.0  | 0.2098 | 8.7  | 0.96 | 1228 | 97 | 1359 | 68  | 1572 | 47  | 1572 | 47  | 78 |
| 60   | 209 | 34,199  | 0.18  | 10.0615 | 0.7  | 3.3168 | 3.9  | 0.2420 | 3.8  | 0.98 | 1397 | 48 | 1485 | 30  | 1613 | 13  | 1613 | 13  | 87 |
| 16   | 807 | 82,679  | 0.21  | 9.9180  | 1.4  | 2.3188 | 10   | 0.1668 | 9.8  | 0.99 | 994  | 91 | 1218 | 71  | 1639 | 27  | 1639 | 27  | 61 |
| 59   | 417 | 23,763  | 0.09  | 9.5370  | 1.5  | 1.5269 | 3.6  | 0.1056 | 3.3  | 0.91 | 647  | 20 | 941  | 22  | 1712 | 27  | 1712 | 27  | 38 |

|      |     |         |      |        |     |         |     |        |      |      |      |     |      |     |      |    |      |    |    |
|------|-----|---------|------|--------|-----|---------|-----|--------|------|------|------|-----|------|-----|------|----|------|----|----|
| 14   | 149 | 198,331 | 0.52 | 9.3260 | 1.2 | 3.1604  | 6.8 | 0.2138 | 6.7  | 0.99 | 1249 | 76  | 1448 | 52  | 1753 | 21 | 1753 | 21 | 71 |
| 53-2 | 167 | 140,272 | 0.94 | 9.1440 | 0.7 | 2.4404  | 4.2 | 0.1618 | 4.1  | 0.99 | 967  | 37  | 1255 | 30  | 1789 | 12 | 1789 | 12 | 54 |
| 42   | 177 | 106,420 | 0.38 | 8.6459 | 2.4 | 3.9528  | 6.6 | 0.2479 | 6.2  | 0.93 | 1427 | 79  | 1625 | 54  | 1890 | 43 | 1890 | 43 | 76 |
| 75   | 275 | 169,523 | 0.37 | 8.6038 | 1.0 | 3.9626  | 2.5 | 0.2473 | 2.3  | 0.92 | 1424 | 30  | 1627 | 20  | 1899 | 18 | 1899 | 18 | 75 |
| 64   | 102 | 112,615 | 0.61 | 8.3081 | 1.1 | 4.4049  | 5.8 | 0.2654 | 5.7  | 0.98 | 1518 | 77  | 1713 | 48  | 1962 | 20 | 1962 | 20 | 77 |
| 80   | 133 | 410,673 | 0.90 | 7.3996 | 0.6 | 5.8275  | 5.4 | 0.3127 | 5.4  | 0.99 | 1754 | 83  | 1951 | 47  | 2166 | 11 | 2166 | 11 | 81 |
| 17   | 192 | 87,356  | 0.63 | 6.2916 | 0.2 | 8.2995  | 1.7 | 0.3787 | 1.7  | 0.99 | 2070 | 30  | 2264 | 15  | 2444 | 3  | 2444 | 3  | 85 |
| 46   | 162 | 97,697  | 0.22 | 6.2419 | 1.4 | 5.0034  | 9.7 | 0.2265 | 9.6  | 0.99 | 1316 | 114 | 1820 | 82  | 2458 | 24 | 2458 | 24 | 54 |
| 29   | 117 | 183,153 | 0.58 | 6.0632 | 0.7 | 8.0357  | 5.2 | 0.3534 | 5.1  | 0.99 | 1951 | 86  | 2235 | 47  | 2507 | 12 | 2507 | 12 | 78 |
| 47-1 | 167 | 35,920  | 0.57 | 5.9011 | 0.3 | 9.0405  | 5.0 | 0.3869 | 5.0  | 1.00 | 2109 | 89  | 2342 | 45  | 2552 | 5  | 2552 | 5  | 83 |
| 53-1 | 176 | 208,795 | 0.55 | 5.7758 | 0.5 | 10.3307 | 4.9 | 0.4328 | 4.9  | 0.99 | 2318 | 95  | 2465 | 46  | 2588 | 9  | 2588 | 9  | 90 |
| 97   | 31  | 36,031  | 0.53 | 3.7630 | 4.7 | 7.5822  | 14  | 0.2069 | 12.7 | 0.94 | 1212 | 141 | 2183 | 122 | 3281 | 73 | 3281 | 73 | 37 |

### Sample 11-111 - St Cyr Snowcap Assemblage

UTM: Zone 08V 0625790 6778030

(n=80/100)

|     |     |         |      |        |     |        |     |        |     |      |      |    |      |    |      |    |      |    |     |
|-----|-----|---------|------|--------|-----|--------|-----|--------|-----|------|------|----|------|----|------|----|------|----|-----|
| 60  | 189 | 92,058  | 0.43 | 8.8501 | 0.6 | 5.1267 | 1.5 | 0.3291 | 1.4 | 0.92 | 1834 | 22 | 1841 | 13 | 1848 | 11 | 1848 | 11 | 99  |
| 68  | 130 | 68,068  | 0.50 | 8.8285 | 1.1 | 5.3809 | 3.4 | 0.3445 | 3.2 | 0.95 | 1908 | 52 | 1882 | 29 | 1853 | 20 | 1853 | 20 | 103 |
| 62  | 103 | 35,367  | 0.67 | 8.8041 | 1.1 | 5.2833 | 3.7 | 0.3374 | 3.6 | 0.96 | 1874 | 58 | 1866 | 32 | 1858 | 19 | 1858 | 19 | 101 |
| 18  | 177 | 115,175 | 0.60 | 8.8006 | 0.6 | 5.4199 | 1.4 | 0.3459 | 1.3 | 0.92 | 1915 | 21 | 1888 | 12 | 1858 | 10 | 1858 | 10 | 103 |
| 65  | 271 | 76,338  | 0.62 | 8.7991 | 0.5 | 5.1411 | 2.4 | 0.3281 | 2.3 | 0.97 | 1829 | 37 | 1843 | 20 | 1859 | 10 | 1859 | 10 | 98  |
| 3   | 294 | 148,439 | 0.51 | 8.7920 | 0.3 | 5.2499 | 2.1 | 0.3348 | 2.1 | 0.99 | 1861 | 34 | 1861 | 18 | 1860 | 5  | 1860 | 5  | 100 |
| 85  | 178 | 269,366 | 1.37 | 8.7908 | 0.9 | 5.0220 | 1.3 | 0.3202 | 0.9 | 0.69 | 1791 | 14 | 1823 | 11 | 1860 | 17 | 1860 | 17 | 96  |
| 5   | 368 | 48,209  | 0.56 | 8.7902 | 0.4 | 5.0329 | 4.0 | 0.3209 | 3.9 | 1.00 | 1794 | 62 | 1825 | 34 | 1860 | 7  | 1860 | 7  | 96  |
| 21  | 206 | 108,525 | 0.55 | 8.7878 | 0.5 | 5.1024 | 1.7 | 0.3252 | 1.7 | 0.95 | 1815 | 26 | 1837 | 15 | 1861 | 10 | 1861 | 10 | 98  |
| 72  | 125 | 53,388  | 0.81 | 8.7788 | 1.4 | 4.9658 | 5.7 | 0.3162 | 5.5 | 0.97 | 1771 | 85 | 1814 | 48 | 1863 | 26 | 1863 | 26 | 95  |
| 24  | 344 | 63,113  | 0.32 | 8.7657 | 0.3 | 5.2357 | 1.2 | 0.3329 | 1.2 | 0.97 | 1852 | 19 | 1858 | 11 | 1865 | 5  | 1865 | 5  | 99  |
| 48  | 125 | 63,897  | 0.89 | 8.7653 | 1.4 | 5.3032 | 2.0 | 0.3371 | 1.4 | 0.72 | 1873 | 23 | 1869 | 17 | 1865 | 25 | 1865 | 25 | 100 |
| 31  | 67  | 31,130  | 0.66 | 8.7592 | 3.1 | 5.1331 | 4.0 | 0.3261 | 2.5 | 0.64 | 1819 | 40 | 1842 | 34 | 1867 | 55 | 1867 | 55 | 97  |
| 95  | 162 | 61,369  | 1.03 | 8.7574 | 0.9 | 5.3201 | 1.4 | 0.3379 | 1.0 | 0.73 | 1877 | 16 | 1872 | 12 | 1867 | 17 | 1867 | 17 | 101 |
| 93  | 154 | 75,804  | 0.55 | 8.7529 | 0.8 | 5.2586 | 2.3 | 0.3338 | 2.1 | 0.94 | 1857 | 34 | 1862 | 19 | 1868 | 14 | 1868 | 14 | 99  |
| 100 | 283 | 52,118  | 1.04 | 8.7210 | 0.4 | 4.8826 | 5.2 | 0.3088 | 5.2 | 1.00 | 1735 | 79 | 1799 | 44 | 1875 | 7  | 1875 | 7  | 93  |
| 89  | 165 | 132,820 | 0.41 | 8.7118 | 1.0 | 5.3338 | 2.8 | 0.3370 | 2.7 | 0.94 | 1872 | 43 | 1874 | 24 | 1877 | 17 | 1877 | 17 | 100 |
| 14  | 116 | 87,493  | 0.63 | 8.7101 | 0.9 | 5.0377 | 2.4 | 0.3182 | 2.2 | 0.93 | 1781 | 34 | 1826 | 20 | 1877 | 16 | 1877 | 16 | 95  |
| 36  | 100 | 50,377  | 0.77 | 8.7062 | 1.5 | 5.3705 | 2.0 | 0.3391 | 1.4 | 0.68 | 1882 | 23 | 1880 | 17 | 1878 | 27 | 1878 | 27 | 100 |
| 54  | 205 | 41,320  | 0.81 | 8.6711 | 2.1 | 5.1534 | 4.1 | 0.3241 | 3.6 | 0.86 | 1810 | 56 | 1845 | 35 | 1885 | 38 | 1885 | 38 | 96  |
| 29  | 143 | 81,621  | 0.35 | 8.6699 | 0.9 | 5.2870 | 1.5 | 0.3324 | 1.3 | 0.83 | 1850 | 21 | 1867 | 13 | 1885 | 16 | 1885 | 16 | 98  |
| 94  | 113 | 39,454  | 0.67 | 8.6635 | 1.9 | 5.3464 | 2.3 | 0.3359 | 1.2 | 0.53 | 1867 | 20 | 1876 | 20 | 1887 | 35 | 1887 | 35 | 99  |
| 38  | 64  | 52,024  | 0.69 | 8.6588 | 2.3 | 5.3058 | 3.3 | 0.3332 | 2.4 | 0.72 | 1854 | 38 | 1870 | 28 | 1888 | 41 | 1888 | 41 | 98  |
| 98  | 185 | 81,522  | 1.25 | 8.5864 | 0.8 | 5.5306 | 1.7 | 0.3444 | 1.5 | 0.89 | 1908 | 26 | 1905 | 15 | 1903 | 14 | 1903 | 14 | 100 |
| 4   | 52  | 15,978  | 1.63 | 8.5488 | 1.9 | 5.5544 | 2.1 | 0.3444 | 0.9 | 0.44 | 1908 | 15 | 1909 | 18 | 1911 | 34 | 1911 | 34 | 100 |

|    |     |         |      |        |     |        |     |        |     |      |      |    |      |    |      |    |      |    |     |
|----|-----|---------|------|--------|-----|--------|-----|--------|-----|------|------|----|------|----|------|----|------|----|-----|
| 37 | 144 | 47,750  | 0.77 | 8.5071 | 1.3 | 5.5411 | 3.7 | 0.3419 | 3.4 | 0.94 | 1896 | 56 | 1907 | 31 | 1919 | 23 | 1919 | 23 | 99  |
| 39 | 88  | 30,602  | 0.64 | 8.4339 | 1.2 | 5.5741 | 1.6 | 0.3410 | 1.0 | 0.64 | 1891 | 17 | 1912 | 14 | 1935 | 22 | 1935 | 22 | 98  |
| 63 | 28  | 18,643  | 1.65 | 8.4169 | 5.4 | 5.5886 | 5.7 | 0.3412 | 2.0 | 0.36 | 1892 | 33 | 1914 | 49 | 1938 | 96 | 1938 | 96 | 98  |
| 66 | 106 | 41,132  | 1.13 | 8.3790 | 0.8 | 5.8023 | 1.5 | 0.3526 | 1.3 | 0.84 | 1947 | 21 | 1947 | 13 | 1946 | 15 | 1946 | 15 | 100 |
| 27 | 187 | 188,789 | 0.49 | 8.2495 | 1.1 | 5.9490 | 1.9 | 0.3559 | 1.6 | 0.81 | 1963 | 27 | 1968 | 17 | 1974 | 20 | 1974 | 20 | 99  |
| 77 | 42  | 16,171  | 0.74 | 8.2307 | 2.5 | 5.8388 | 3.7 | 0.3485 | 2.7 | 0.73 | 1928 | 46 | 1952 | 32 | 1978 | 45 | 1978 | 45 | 97  |
| 50 | 107 | 60,008  | 0.53 | 8.2047 | 1.0 | 6.0891 | 1.3 | 0.3623 | 0.8 | 0.61 | 1993 | 13 | 1989 | 11 | 1984 | 18 | 1984 | 18 | 100 |
| 55 | 105 | 91,518  | 0.42 | 8.2036 | 1.0 | 6.1768 | 2.9 | 0.3675 | 2.8 | 0.94 | 2018 | 48 | 2001 | 26 | 1984 | 18 | 1984 | 18 | 102 |
| 56 | 278 | 65,613  | 0.64 | 8.1897 | 0.7 | 5.7414 | 1.8 | 0.3410 | 1.7 | 0.93 | 1892 | 27 | 1938 | 16 | 1987 | 12 | 1987 | 12 | 95  |
| 8  | 68  | 33,311  | 0.91 | 8.1807 | 1.3 | 6.1799 | 2.2 | 0.3667 | 1.8 | 0.82 | 2014 | 32 | 2002 | 20 | 1989 | 23 | 1989 | 23 | 101 |
| 82 | 68  | 83,585  | 0.81 | 8.1748 | 1.4 | 5.9367 | 1.8 | 0.3520 | 1.2 | 0.65 | 1944 | 20 | 1967 | 16 | 1990 | 25 | 1990 | 25 | 98  |
| 59 | 20  | 11,700  | 0.66 | 8.172  | 5.2 | 6.4975 | 5.8 | 0.3851 | 2.6 | 0.44 | 2100 | 46 | 2046 | 51 | 1991 | 93 | 1991 | 93 | 105 |
| 69 | 92  | 102,060 | 0.75 | 8.1698 | 0.9 | 6.1663 | 1.4 | 0.3654 | 1.1 | 0.79 | 2008 | 20 | 2000 | 13 | 1992 | 16 | 1992 | 16 | 101 |
| 7  | 109 | 105,429 | 1.70 | 8.1639 | 0.9 | 6.0568 | 1.8 | 0.3586 | 1.5 | 0.87 | 1976 | 26 | 1984 | 16 | 1993 | 16 | 1993 | 16 | 99  |
| 9  | 145 | 61,024  | 0.85 | 8.1582 | 0.7 | 6.0186 | 3.5 | 0.3561 | 3.4 | 0.98 | 1964 | 58 | 1979 | 30 | 1994 | 13 | 1994 | 13 | 98  |
| 80 | 115 | 53,257  | 0.33 | 8.1418 | 1.1 | 6.1993 | 3.8 | 0.3661 | 3.6 | 0.95 | 2011 | 62 | 2004 | 33 | 1998 | 20 | 1998 | 20 | 101 |
| 30 | 133 | 76,867  | 0.41 | 8.1378 | 1.2 | 5.9999 | 1.9 | 0.3541 | 1.5 | 0.78 | 1954 | 25 | 1976 | 16 | 1998 | 21 | 1998 | 21 | 98  |
| 44 | 168 | 85,490  | 0.62 | 8.1289 | 0.8 | 6.0946 | 1.4 | 0.3593 | 1.2 | 0.83 | 1979 | 20 | 1989 | 13 | 2000 | 14 | 2000 | 14 | 99  |
| 83 | 139 | 78,246  | 0.41 | 8.1250 | 0.9 | 5.8858 | 1.6 | 0.3468 | 1.4 | 0.84 | 1919 | 23 | 1959 | 14 | 2001 | 16 | 2001 | 16 | 96  |
| 78 | 259 | 92,120  | 0.48 | 8.1173 | 0.4 | 5.9147 | 1.3 | 0.3482 | 1.3 | 0.96 | 1926 | 21 | 1963 | 11 | 2003 | 7  | 2003 | 7  | 96  |
| 19 | 190 | 240,384 | 0.42 | 8.1117 | 0.4 | 6.2230 | 0.9 | 0.3661 | 0.8 | 0.89 | 2011 | 14 | 2008 | 8  | 2004 | 7  | 2004 | 7  | 100 |
| 32 | 157 | 173,476 | 0.48 | 8.0991 | 0.8 | 6.0989 | 1.7 | 0.3583 | 1.5 | 0.89 | 1974 | 25 | 1990 | 15 | 2007 | 14 | 2007 | 14 | 98  |
| 75 | 35  | 25,634  | 0.89 | 8.0774 | 2.5 | 6.1986 | 4.0 | 0.3631 | 3.1 | 0.77 | 1997 | 53 | 2004 | 35 | 2012 | 45 | 2012 | 45 | 99  |
| 33 | 93  | 47,849  | 0.44 | 8.0309 | 1.1 | 6.1818 | 1.6 | 0.3601 | 1.1 | 0.70 | 1982 | 19 | 2002 | 14 | 2022 | 20 | 2022 | 20 | 98  |
| 20 | 323 | 184,470 | 0.40 | 7.9140 | 0.6 | 6.5987 | 1.0 | 0.3788 | 0.9 | 0.85 | 2070 | 16 | 2059 | 9  | 2048 | 10 | 2048 | 10 | 101 |
| 99 | 188 | 66,536  | 0.78 | 7.7750 | 0.5 | 6.2318 | 1.8 | 0.3514 | 1.7 | 0.96 | 1941 | 29 | 2009 | 16 | 2079 | 9  | 2079 | 9  | 93  |
| 64 | 115 | 56,112  | 0.53 | 7.7615 | 1.5 | 6.7488 | 2.9 | 0.3799 | 2.5 | 0.85 | 2076 | 44 | 2079 | 26 | 2082 | 27 | 2082 | 27 | 100 |
| 34 | 182 | 55,453  | 0.37 | 7.7364 | 1.1 | 6.6264 | 1.9 | 0.3718 | 1.6 | 0.82 | 2038 | 28 | 2063 | 17 | 2088 | 20 | 2088 | 20 | 98  |
| 84 | 112 | 41,008  | 0.68 | 7.7041 | 1.5 | 6.6072 | 3.0 | 0.3692 | 2.6 | 0.86 | 2026 | 44 | 2060 | 26 | 2095 | 26 | 2095 | 26 | 97  |
| 76 | 86  | 13,782  | 0.60 | 7.6682 | 2.4 | 6.7962 | 2.7 | 0.3780 | 1.2 | 0.46 | 2067 | 22 | 2085 | 24 | 2103 | 42 | 2103 | 42 | 98  |
| 6  | 164 | 58,208  | 0.37 | 7.6372 | 0.9 | 6.8380 | 1.8 | 0.3788 | 1.5 | 0.86 | 2070 | 27 | 2091 | 16 | 2111 | 16 | 2111 | 16 | 98  |
| 40 | 196 | 200,383 | 0.49 | 7.6248 | 0.6 | 6.9448 | 1.5 | 0.3840 | 1.3 | 0.90 | 2095 | 24 | 2104 | 13 | 2113 | 11 | 2113 | 11 | 99  |
| 28 | 107 | 54,105  | 0.40 | 7.5223 | 0.8 | 7.0700 | 2.0 | 0.3857 | 1.8 | 0.92 | 2103 | 32 | 2120 | 18 | 2137 | 14 | 2137 | 14 | 98  |
| 70 | 206 | 54,413  | 0.03 | 7.5050 | 0.6 | 7.5855 | 2.7 | 0.4129 | 2.7 | 0.98 | 2228 | 50 | 2183 | 24 | 2141 | 10 | 2141 | 10 | 104 |
| 1  | 65  | 87,931  | 0.66 | 7.3958 | 1.5 | 7.2995 | 2.0 | 0.3915 | 1.3 | 0.67 | 2130 | 24 | 2149 | 18 | 2167 | 25 | 2167 | 25 | 98  |
| 45 | 96  | 58,487  | 0.66 | 7.3705 | 1.1 | 6.7363 | 5.4 | 0.3601 | 5.3 | 0.98 | 1983 | 91 | 2077 | 48 | 2173 | 19 | 2173 | 19 | 91  |
| 74 | 119 | 74,048  | 0.49 | 7.0323 | 1.0 | 7.6899 | 5.2 | 0.3922 | 5.1 | 0.98 | 2133 | 92 | 2195 | 47 | 2254 | 17 | 2254 | 17 | 95  |
| 46 | 484 | 37,601  | 0.61 | 6.8565 | 0.5 | 7.7547 | 3.9 | 0.3856 | 3.9 | 0.99 | 2103 | 69 | 2203 | 35 | 2298 | 8  | 2298 | 8  | 92  |
| 15 | 100 | 42,051  | 0.51 | 6.8565 | 1.0 | 8.6113 | 5.0 | 0.4282 | 4.9 | 0.98 | 2298 | 95 | 2298 | 45 | 2298 | 17 | 2298 | 17 | 100 |
| 12 | 251 | 113,200 | 0.54 | 6.8330 | 0.3 | 8.4566 | 1.3 | 0.4191 | 1.3 | 0.98 | 2256 | 25 | 2281 | 12 | 2304 | 5  | 2304 | 5  | 98  |
| 87 | 338 | 41,006  | 0.63 | 6.8173 | 0.5 | 8.0470 | 5.0 | 0.3979 | 5.0 | 0.99 | 2159 | 91 | 2236 | 45 | 2308 | 9  | 2308 | 9  | 94  |

|    |     |         |      |        |     |         |     |        |     |      |      |    |      |    |      |    |      |    |     |
|----|-----|---------|------|--------|-----|---------|-----|--------|-----|------|------|----|------|----|------|----|------|----|-----|
| 81 | 307 | 67,516  | 0.35 | 6.8164 | 0.6 | 8.2613  | 4.4 | 0.4084 | 4.3 | 0.99 | 2208 | 81 | 2260 | 40 | 2308 | 10 | 2308 | 10 | 96  |
| 22 | 305 | 357,901 | 0.53 | 6.7776 | 0.4 | 8.8658  | 2.1 | 0.4358 | 2.1 | 0.98 | 2332 | 40 | 2324 | 19 | 2318 | 7  | 2318 | 7  | 101 |
| 26 | 225 | 427,077 | 0.64 | 6.7593 | 0.4 | 8.8386  | 2.3 | 0.4333 | 2.3 | 0.99 | 2321 | 45 | 2321 | 21 | 2322 | 6  | 2322 | 6  | 100 |
| 57 | 118 | 174,720 | 0.47 | 6.7531 | 0.7 | 8.9190  | 1.8 | 0.4368 | 1.6 | 0.91 | 2336 | 32 | 2330 | 16 | 2324 | 13 | 2324 | 13 | 101 |
| 90 | 155 | 99,687  | 0.58 | 6.7512 | 0.8 | 8.6215  | 1.7 | 0.4221 | 1.5 | 0.89 | 2270 | 28 | 2299 | 15 | 2324 | 13 | 2324 | 13 | 98  |
| 97 | 232 | 29,010  | 0.62 | 6.7228 | 0.6 | 8.1395  | 2.8 | 0.3969 | 2.7 | 0.98 | 2155 | 50 | 2247 | 25 | 2332 | 10 | 2332 | 10 | 92  |
| 35 | 83  | 137,245 | 0.43 | 6.0391 | 0.7 | 10.4767 | 1.6 | 0.4589 | 1.4 | 0.91 | 2435 | 29 | 2478 | 15 | 2514 | 11 | 2514 | 11 | 97  |
| 73 | 309 | 60,765  | 0.47 | 5.9011 | 0.3 | 11.1484 | 1.1 | 0.4771 | 1.0 | 0.95 | 2515 | 21 | 2536 | 10 | 2552 | 5  | 2552 | 5  | 99  |
| 88 | 361 | 1,921   | 0.48 | 5.856  | 2.3 | 10.1140 | 3.2 | 0.4296 | 2.2 | 0.70 | 2304 | 43 | 2445 | 30 | 2565 | 39 | 2565 | 39 | 90  |
| 16 | 31  | 20,678  | 0.85 | 5.7585 | 1.9 | 11.5295 | 5.1 | 0.4815 | 4.7 | 0.93 | 2534 | 99 | 2567 | 48 | 2593 | 32 | 2593 | 32 | 98  |
| 91 | 155 | 56,735  | 0.62 | 5.7335 | 0.7 | 11.9819 | 2.6 | 0.4982 | 2.5 | 0.97 | 2606 | 54 | 2603 | 24 | 2600 | 11 | 2600 | 11 | 100 |
| 23 | 30  | 20,097  | 0.59 | 5.4754 | 2.2 | 12.9017 | 2.9 | 0.5123 | 1.9 | 0.64 | 2667 | 41 | 2672 | 27 | 2677 | 37 | 2677 | 37 | 100 |
| 43 | 39  | 18,735  | 0.76 | 5.4530 | 1.6 | 12.6836 | 2.7 | 0.5016 | 2.2 | 0.81 | 2621 | 48 | 2656 | 26 | 2684 | 26 | 2684 | 26 | 98  |
| 25 | 32  | 21,312  | 0.72 | 5.3879 | 1.4 | 12.7307 | 3.3 | 0.4975 | 3.0 | 0.91 | 2603 | 63 | 2660 | 31 | 2704 | 23 | 2704 | 23 | 96  |

**Rejected analyses**

|    |     |        |      |        |     |         |     |        |     |      |      |     |      |     |      |     |      |     |     |
|----|-----|--------|------|--------|-----|---------|-----|--------|-----|------|------|-----|------|-----|------|-----|------|-----|-----|
| 86 | 447 | 30,115 | 0.47 | 8.3279 | 0.3 | 5.0893  | 1.1 | 0.3074 | 1.1 | 0.97 | 1728 | 16  | 1834 | 10  | 1957 | 5   | 1957 | 5   | 88  |
| 41 | 178 | 13,730 | 0.66 | 8.5593 | 0.8 | 4.7645  | 1.8 | 0.2958 | 1.7 | 0.91 | 1670 | 24  | 1779 | 15  | 1908 | 14  | 1908 | 14  | 88  |
| 92 | 327 | 34,093 | 0.48 | 6.8681 | 0.3 | 6.9936  | 3.4 | 0.3484 | 3.3 | 1.00 | 1927 | 56  | 2111 | 30  | 2295 | 5   | 2295 | 5   | 84  |
| 11 | 435 | 12,620 | 0.41 | 7.9635 | 0.5 | 4.6236  | 3.8 | 0.2670 | 3.7 | 0.99 | 1526 | 51  | 1754 | 32  | 2037 | 10  | 2037 | 10  | 75  |
| 10 | 305 | 26,117 | 0.39 | 7.3877 | 0.8 | 6.4256  | 5.7 | 0.3443 | 5.6 | 0.99 | 1907 | 92  | 2036 | 50  | 2169 | 14  | 2169 | 14  | 88  |
| 13 | 67  | 31,272 | 0.86 | 8.4287 | 2.5 | 5.3378  | 6.7 | 0.3263 | 6.2 | 0.93 | 1820 | 99  | 1875 | 58  | 1936 | 44  | 1936 | 44  | 94  |
| 49 | 29  | 15,194 | 0.81 | 5.6310 | 1.7 | 12.5859 | 8.0 | 0.5140 | 7.8 | 0.98 | 2674 | 170 | 2649 | 75  | 2630 | 29  | 2630 | 29  | 102 |
| 96 | 16  | 7,542  | 1.24 | 6.5706 | 6.5 | 9.2183  | 11  | 0.4393 | 8.4 | 0.79 | 2347 | 165 | 2360 | 98  | 2371 | 111 | 2371 | 111 | 99  |
| 79 | 75  | 22,299 | 0.48 | 5.9171 | 1.3 | 9.8439  | 8.8 | 0.4225 | 8.7 | 0.99 | 2272 | 167 | 2420 | 81  | 2548 | 21  | 2548 | 21  | 89  |
| 52 | 144 | 49,300 | 0.36 | 7.771  | 2.4 | 7.6299  | 10  | 0.4300 | 10  | 0.97 | 2306 | 197 | 2188 | 94  | 2080 | 42  | 2080 | 42  | 111 |
| 71 | 489 | 20,706 | 0.57 | 9.298  | 0.8 | 2.8358  | 9.7 | 0.1912 | 9.6 | 1.00 | 1128 | 100 | 1365 | 73  | 1758 | 14  | 1758 | 14  | 64  |
| 61 | 508 | 8,068  | 0.51 | 6.794  | 1.9 | 7.9473  | 11  | 0.3916 | 11  | 0.99 | 2130 | 198 | 2225 | 100 | 2313 | 32  | 2313 | 32  | 92  |
| 67 | 319 | 20,626 | 0.76 | 8.929  | 0.8 | 4.6799  | 15  | 0.3030 | 15  | 1.00 | 1706 | 221 | 1764 | 124 | 1832 | 15  | 1832 | 15  | 93  |
| 42 | 203 | 53,455 | 0.90 | 6.929  | 0.9 | 7.7212  | 15  | 0.3880 | 15  | 1.00 | 2114 | 277 | 2199 | 139 | 2280 | 16  | 2280 | 16  | 93  |
| 51 | 371 | 38,252 | 0.14 | 8.402  | 3.6 | 5.2758  | 19  | 0.3215 | 18  | 0.98 | 1797 | 287 | 1865 | 161 | 1942 | 65  | 1942 | 65  | 93  |
| 2  | 46  | 14,049 | 1.44 | 9.383  | 3.1 | 5.2299  | 19  | 0.3559 | 19  | 0.99 | 1963 | 319 | 1858 | 164 | 1742 | 56  | 1742 | 56  | 113 |
| 53 | 301 | 12,083 | 0.81 | 7.587  | 7.8 | 7.8014  | 29  | 0.4293 | 28  | 0.96 | 2302 | 544 | 2208 | 268 | 2122 | 137 | 2122 | 137 | 108 |
| 47 | 202 | 2,032  | 0.80 | 7.110  | 3.3 | 4.6062  | 34  | 0.2375 | 34  | 1.00 | 1374 | 422 | 1750 | 293 | 2235 | 57  | 2235 | 57  | 61  |
| 58 | 830 | 1,330  | 0.43 | 9.232  | 3.6 | 1.3616  | 37  | 0.0912 | 37  | 1.00 | 562  | 200 | 873  | 222 | 1771 | 66  | 1771 | 66  | 32  |
| 17 | 295 | 21,608 | 0.53 | 8.086  | 2.5 | 2.8468  | 50  | 0.1670 | 50  | 1.00 | 995  | 464 | 1368 | 397 | 2010 | 44  | 2010 | 44  | 50  |

**Sample 12-67 - St Cyr Snowcap Assemblage**

UTM: Zone 08V 0621889 6777429

(n=80/100)

|    |     |         |      |        |     |        |     |        |     |      |      |    |      |    |      |    |      |    |     |
|----|-----|---------|------|--------|-----|--------|-----|--------|-----|------|------|----|------|----|------|----|------|----|-----|
| 29 | 101 | 275,121 | 0.76 | 9.6718 | 0.8 | 4.3316 | 2.9 | 0.3038 | 2.8 | 0.96 | 1710 | 42 | 1699 | 24 | 1686 | 14 | 1686 | 14 | 101 |
|----|-----|---------|------|--------|-----|--------|-----|--------|-----|------|------|----|------|----|------|----|------|----|-----|

|    |     |         |      |        |     |        |     |        |     |      |      |     |      |    |      |    |      |    |     |
|----|-----|---------|------|--------|-----|--------|-----|--------|-----|------|------|-----|------|----|------|----|------|----|-----|
| 90 | 95  | 110,720 | 0.74 | 9.1961 | 0.8 | 4.7800 | 1.0 | 0.3188 | 0.6 | 0.56 | 1784 | 9   | 1781 | 8  | 1778 | 15 | 1778 | 15 | 100 |
| 72 | 117 | 152,371 | 0.63 | 9.1914 | 0.5 | 4.8134 | 2.4 | 0.3209 | 2.3 | 0.97 | 1794 | 37  | 1787 | 20 | 1779 | 10 | 1779 | 10 | 101 |
| 24 | 216 | 344,342 | 1.12 | 9.1777 | 0.4 | 4.7016 | 2.1 | 0.3130 | 2.1 | 0.99 | 1755 | 32  | 1768 | 18 | 1782 | 7  | 1782 | 7  | 98  |
| 85 | 299 | 459,426 | 0.21 | 9.1764 | 0.2 | 4.8540 | 3.2 | 0.3230 | 3.2 | 1.00 | 1805 | 51  | 1794 | 27 | 1782 | 3  | 1782 | 3  | 101 |
| 76 | 278 | 368,295 | 0.34 | 9.1635 | 0.2 | 4.7972 | 1.1 | 0.3188 | 1.0 | 0.99 | 1784 | 16  | 1784 | 9  | 1785 | 3  | 1785 | 3  | 100 |
| 17 | 168 | 132,262 | 0.75 | 8.9919 | 0.5 | 4.6124 | 2.0 | 0.3008 | 1.9 | 0.97 | 1695 | 28  | 1752 | 16 | 1819 | 9  | 1819 | 9  | 93  |
| 45 | 205 | 224,113 | 0.51 | 8.9664 | 0.6 | 4.8885 | 2.9 | 0.3179 | 2.9 | 0.98 | 1779 | 44  | 1800 | 25 | 1824 | 10 | 1824 | 10 | 98  |
| 64 | 226 | 33,563  | 1.34 | 8.8778 | 0.4 | 4.7707 | 2.8 | 0.3072 | 2.8 | 0.99 | 1727 | 42  | 1780 | 24 | 1842 | 7  | 1842 | 7  | 94  |
| 95 | 77  | 170,397 | 0.86 | 8.8614 | 0.8 | 5.1853 | 1.0 | 0.3333 | 0.7 | 0.64 | 1854 | 11  | 1850 | 9  | 1846 | 14 | 1846 | 14 | 100 |
| 53 | 117 | 59,692  | 1.01 | 8.8552 | 0.7 | 4.9523 | 7.3 | 0.3181 | 7.3 | 0.99 | 1780 | 113 | 1811 | 62 | 1847 | 13 | 1847 | 13 | 96  |
| 25 | 96  | 126,996 | 1.19 | 8.8509 | 0.8 | 5.2264 | 3.8 | 0.3355 | 3.7 | 0.98 | 1865 | 60  | 1857 | 32 | 1848 | 14 | 1848 | 14 | 101 |
| 46 | 109 | 141,162 | 0.91 | 8.8501 | 0.7 | 5.2260 | 1.5 | 0.3354 | 1.4 | 0.90 | 1865 | 22  | 1857 | 13 | 1848 | 12 | 1848 | 12 | 101 |
| 93 | 414 | 82,421  | 0.47 | 8.8486 | 0.1 | 4.7194 | 0.8 | 0.3029 | 0.8 | 0.99 | 1706 | 11  | 1771 | 6  | 1848 | 2  | 1848 | 2  | 92  |
| 74 | 185 | 119,178 | 0.50 | 8.8375 | 0.4 | 4.9784 | 1.9 | 0.3191 | 1.8 | 0.98 | 1785 | 28  | 1816 | 16 | 1851 | 7  | 1851 | 7  | 96  |
| 75 | 53  | 63,457  | 1.39 | 8.8344 | 1.1 | 4.9163 | 1.7 | 0.3150 | 1.3 | 0.76 | 1765 | 20  | 1805 | 14 | 1851 | 20 | 1851 | 20 | 95  |
| 81 | 36  | 64,278  | 0.87 | 8.8196 | 1.7 | 5.2779 | 2.4 | 0.3376 | 1.7 | 0.70 | 1875 | 28  | 1865 | 21 | 1854 | 31 | 1854 | 31 | 101 |
| 28 | 54  | 92,545  | 1.64 | 8.8004 | 0.8 | 5.2180 | 1.0 | 0.3330 | 0.6 | 0.55 | 1853 | 9   | 1856 | 8  | 1858 | 15 | 1858 | 15 | 100 |
| 71 | 70  | 168,217 | 0.77 | 8.7988 | 0.6 | 5.3018 | 1.4 | 0.3383 | 1.2 | 0.89 | 1879 | 20  | 1869 | 12 | 1859 | 11 | 1859 | 11 | 101 |
| 83 | 51  | 71,599  | 0.75 | 8.7821 | 0.7 | 5.3012 | 1.8 | 0.3377 | 1.6 | 0.91 | 1875 | 27  | 1869 | 15 | 1862 | 13 | 1862 | 13 | 101 |
| 10 | 109 | 263,761 | 0.73 | 8.7781 | 0.4 | 5.2434 | 0.7 | 0.3338 | 0.6 | 0.82 | 1857 | 10  | 1860 | 6  | 1863 | 8  | 1863 | 8  | 100 |
| 13 | 130 | 357,232 | 0.54 | 8.7581 | 0.7 | 5.3339 | 1.3 | 0.3388 | 1.1 | 0.84 | 1881 | 17  | 1874 | 11 | 1867 | 12 | 1867 | 12 | 101 |
| 77 | 94  | 115,171 | 0.74 | 8.7556 | 0.4 | 5.2224 | 0.9 | 0.3316 | 0.8 | 0.90 | 1846 | 12  | 1856 | 7  | 1867 | 7  | 1867 | 7  | 99  |
| 16 | 200 | 296,579 | 1.04 | 8.7472 | 0.2 | 5.2657 | 1.8 | 0.3341 | 1.8 | 0.99 | 1858 | 29  | 1863 | 16 | 1869 | 4  | 1869 | 4  | 99  |
| 51 | 80  | 187,373 | 0.56 | 8.7448 | 0.7 | 5.3283 | 1.5 | 0.3379 | 1.4 | 0.90 | 1877 | 23  | 1873 | 13 | 1870 | 12 | 1870 | 12 | 100 |
| 59 | 28  | 39,266  | 1.47 | 8.6855 | 1.6 | 5.3811 | 1.8 | 0.3390 | 0.8 | 0.45 | 1882 | 13  | 1882 | 15 | 1882 | 29 | 1882 | 29 | 100 |
| 89 | 59  | 123,764 | 1.20 | 8.6233 | 1.3 | 5.5441 | 2.1 | 0.3467 | 1.7 | 0.79 | 1919 | 27  | 1907 | 18 | 1895 | 23 | 1895 | 23 | 101 |
| 70 | 57  | 114,303 | 0.84 | 8.5862 | 1.3 | 5.6664 | 1.9 | 0.3529 | 1.3 | 0.71 | 1948 | 22  | 1926 | 16 | 1903 | 24 | 1903 | 24 | 102 |
| 92 | 158 | 267,802 | 1.61 | 8.5557 | 0.5 | 5.5690 | 2.2 | 0.3456 | 2.1 | 0.98 | 1913 | 35  | 1911 | 19 | 1909 | 8  | 1909 | 8  | 100 |
| 68 | 42  | 72,180  | 1.23 | 8.5459 | 1.0 | 5.5778 | 2.0 | 0.3457 | 1.8 | 0.87 | 1914 | 30  | 1913 | 18 | 1911 | 18 | 1911 | 18 | 100 |
| 52 | 97  | 83,942  | 0.80 | 8.5318 | 0.4 | 5.5470 | 0.8 | 0.3432 | 0.7 | 0.89 | 1902 | 11  | 1908 | 7  | 1914 | 6  | 1914 | 6  | 99  |
| 37 | 26  | 25,233  | 1.88 | 8.5304 | 2.1 | 5.4800 | 2.4 | 0.3390 | 1.1 | 0.47 | 1882 | 19  | 1897 | 21 | 1914 | 38 | 1914 | 38 | 98  |
| 98 | 65  | 232,307 | 1.21 | 8.4923 | 0.8 | 5.7266 | 2.1 | 0.3527 | 1.9 | 0.92 | 1948 | 32  | 1935 | 18 | 1922 | 14 | 1922 | 14 | 101 |
| 4  | 248 | 432,346 | 0.36 | 8.4799 | 0.2 | 5.6674 | 0.9 | 0.3486 | 0.9 | 0.96 | 1928 | 14  | 1926 | 8  | 1925 | 4  | 1925 | 4  | 100 |
| 11 | 116 | 21,701  | 1.44 | 8.3520 | 0.4 | 5.3276 | 4.7 | 0.3227 | 4.7 | 1.00 | 1803 | 74  | 1873 | 41 | 1952 | 6  | 1952 | 6  | 92  |
| 88 | 247 | 254,106 | 0.71 | 8.2323 | 0.3 | 5.3967 | 1.1 | 0.3222 | 1.0 | 0.97 | 1801 | 16  | 1884 | 9  | 1978 | 5  | 1978 | 5  | 91  |
| 22 | 137 | 107,481 | 1.26 | 8.2302 | 0.3 | 5.5206 | 1.7 | 0.3295 | 1.7 | 0.98 | 1836 | 27  | 1904 | 15 | 1978 | 6  | 1978 | 6  | 93  |
| 9  | 126 | 191,613 | 1.43 | 8.2029 | 0.5 | 6.0644 | 0.9 | 0.3608 | 0.7 | 0.82 | 1986 | 13  | 1985 | 8  | 1984 | 9  | 1984 | 9  | 100 |
| 57 | 241 | 296,627 | 0.68 | 8.1766 | 0.2 | 6.0956 | 0.7 | 0.3615 | 0.7 | 0.97 | 1989 | 12  | 1990 | 6  | 1990 | 3  | 1990 | 3  | 100 |
| 78 | 85  | 106,597 | 1.65 | 8.1719 | 0.4 | 6.1368 | 1.4 | 0.3637 | 1.4 | 0.96 | 2000 | 24  | 1995 | 13 | 1991 | 7  | 1991 | 7  | 100 |
| 35 | 283 | 214,368 | 0.52 | 8.1712 | 0.2 | 5.9756 | 0.6 | 0.3541 | 0.5 | 0.93 | 1954 | 9   | 1972 | 5  | 1991 | 4  | 1991 | 4  | 98  |
| 86 | 165 | 301,850 | 0.46 | 8.1487 | 0.2 | 6.3199 | 2.5 | 0.3735 | 2.5 | 1.00 | 2046 | 43  | 2021 | 22 | 1996 | 4  | 1996 | 4  | 102 |

|    |     |           |      |        |     |         |     |        |     |      |      |     |      |    |      |    |      |    |     |
|----|-----|-----------|------|--------|-----|---------|-----|--------|-----|------|------|-----|------|----|------|----|------|----|-----|
| 23 | 158 | 217,305   | 1.38 | 8.1390 | 0.5 | 5.9016  | 3.1 | 0.3484 | 3.1 | 0.99 | 1927 | 52  | 1961 | 27 | 1998 | 9  | 1998 | 9  | 96  |
| 62 | 93  | 190,594   | 0.99 | 8.1282 | 0.3 | 6.2606  | 0.8 | 0.3691 | 0.8 | 0.95 | 2025 | 14  | 2013 | 7  | 2001 | 5  | 2001 | 5  | 101 |
| 48 | 78  | 22,861    | 0.71 | 8.0971 | 0.6 | 6.3978  | 4.0 | 0.3757 | 3.9 | 0.99 | 2056 | 69  | 2032 | 35 | 2007 | 10 | 2007 | 10 | 102 |
| 82 | 109 | 160,638   | 0.84 | 8.0944 | 0.5 | 6.2447  | 1.5 | 0.3666 | 1.4 | 0.93 | 2013 | 24  | 2011 | 13 | 2008 | 9  | 2008 | 9  | 100 |
| 66 | 39  | 37,116    | 0.82 | 8.0739 | 1.4 | 6.2360  | 2.9 | 0.3652 | 2.6 | 0.87 | 2007 | 44  | 2010 | 26 | 2012 | 25 | 2012 | 25 | 100 |
| 67 | 162 | 75,797    | 1.19 | 7.9267 | 0.3 | 6.0619  | 3.3 | 0.3485 | 3.3 | 0.99 | 1927 | 55  | 1985 | 29 | 2045 | 6  | 2045 | 6  | 94  |
| 80 | 143 | 207,203   | 0.52 | 7.8976 | 0.5 | 6.5941  | 2.2 | 0.3777 | 2.1 | 0.97 | 2066 | 37  | 2059 | 19 | 2052 | 9  | 2052 | 9  | 101 |
| 18 | 323 | 44,086    | 1.74 | 7.8590 | 0.2 | 6.0978  | 0.7 | 0.3476 | 0.7 | 0.95 | 1923 | 11  | 1990 | 6  | 2060 | 4  | 2060 | 4  | 93  |
| 97 | 226 | 240,868   | 0.73 | 7.8063 | 0.2 | 6.1303  | 1.4 | 0.3471 | 1.4 | 0.99 | 1921 | 23  | 1995 | 12 | 2072 | 4  | 2072 | 4  | 93  |
| 65 | 177 | 259,491   | 0.76 | 7.6633 | 0.2 | 6.9493  | 0.8 | 0.3862 | 0.8 | 0.95 | 2105 | 14  | 2105 | 7  | 2105 | 4  | 2105 | 4  | 100 |
| 14 | 45  | 117,858   | 0.50 | 7.6522 | 0.9 | 7.0350  | 1.6 | 0.3904 | 1.3 | 0.84 | 2125 | 24  | 2116 | 14 | 2107 | 15 | 2107 | 15 | 101 |
| 1  | 99  | 282,995   | 0.38 | 7.5677 | 0.6 | 7.1980  | 0.9 | 0.3951 | 0.7 | 0.78 | 2146 | 13  | 2136 | 8  | 2127 | 10 | 2127 | 10 | 101 |
| 26 | 51  | 58,110    | 0.49 | 7.4700 | 0.8 | 7.5024  | 2.1 | 0.4065 | 1.9 | 0.93 | 2199 | 36  | 2173 | 19 | 2149 | 13 | 2149 | 13 | 102 |
| 91 | 146 | 39,660    | 0.61 | 7.4644 | 0.7 | 7.1590  | 2.6 | 0.3876 | 2.5 | 0.97 | 2112 | 45  | 2131 | 23 | 2151 | 12 | 2151 | 12 | 98  |
| 73 | 36  | 65,455    | 0.94 | 7.3668 | 0.9 | 7.5695  | 1.3 | 0.4044 | 0.9 | 0.71 | 2189 | 17  | 2181 | 12 | 2174 | 16 | 2174 | 16 | 101 |
| 32 | 61  | 151,877   | 0.53 | 7.2443 | 0.8 | 7.4194  | 3.1 | 0.3898 | 3.0 | 0.97 | 2122 | 54  | 2163 | 28 | 2203 | 13 | 2203 | 13 | 96  |
| 33 | 213 | 19,127    | 1.15 | 6.9651 | 0.9 | 7.6382  | 3.8 | 0.3858 | 3.7 | 0.97 | 2104 | 66  | 2189 | 34 | 2271 | 15 | 2271 | 15 | 93  |
| 99 | 207 | 119,037   | 0.68 | 6.9545 | 0.9 | 8.3456  | 6.1 | 0.4209 | 6.0 | 0.99 | 2265 | 115 | 2269 | 55 | 2273 | 15 | 2273 | 15 | 100 |
| 54 | 59  | 74,353    | 0.88 | 6.8311 | 0.9 | 8.7907  | 1.2 | 0.4355 | 0.9 | 0.72 | 2331 | 18  | 2317 | 11 | 2304 | 15 | 2304 | 15 | 101 |
| 61 | 138 | 308,760   | 0.38 | 6.8153 | 0.3 | 8.9164  | 1.3 | 0.4407 | 1.2 | 0.97 | 2354 | 25  | 2329 | 12 | 2308 | 5  | 2308 | 5  | 102 |
| 7  | 65  | 145,355   | 0.70 | 6.8067 | 0.5 | 8.4886  | 1.9 | 0.4191 | 1.8 | 0.97 | 2256 | 34  | 2285 | 17 | 2310 | 8  | 2310 | 8  | 98  |
| 31 | 208 | 169,583   | 0.59 | 6.8058 | 0.2 | 8.3357  | 3.9 | 0.4115 | 3.9 | 1.00 | 2222 | 74  | 2268 | 36 | 2311 | 3  | 2311 | 3  | 96  |
| 50 | 89  | 200,856   | 0.64 | 6.7981 | 0.2 | 8.7790  | 0.9 | 0.4328 | 0.9 | 0.97 | 2319 | 17  | 2315 | 8  | 2312 | 4  | 2312 | 4  | 100 |
| 12 | 155 | 308,417   | 0.37 | 6.7862 | 0.4 | 9.0123  | 1.0 | 0.4436 | 0.9 | 0.93 | 2367 | 18  | 2339 | 9  | 2315 | 6  | 2315 | 6  | 102 |
| 56 | 158 | 263,054   | 0.58 | 6.7562 | 0.3 | 8.8537  | 1.8 | 0.4338 | 1.8 | 0.99 | 2323 | 36  | 2323 | 17 | 2323 | 4  | 2323 | 4  | 100 |
| 2  | 88  | 200,640   | 1.28 | 6.6649 | 0.7 | 8.9811  | 2.3 | 0.4341 | 2.2 | 0.95 | 2324 | 42  | 2336 | 21 | 2346 | 12 | 2346 | 12 | 99  |
| 79 | 194 | 1,097,720 | 0.54 | 6.4973 | 0.2 | 9.5210  | 1.3 | 0.4487 | 1.2 | 0.99 | 2389 | 25  | 2390 | 12 | 2390 | 3  | 2390 | 3  | 100 |
| 30 | 98  | 118,676   | 0.52 | 6.1168 | 0.4 | 10.0545 | 1.9 | 0.4460 | 1.9 | 0.97 | 2378 | 37  | 2440 | 18 | 2492 | 7  | 2492 | 7  | 95  |
| 34 | 174 | 327,189   | 0.75 | 5.9825 | 0.1 | 11.2107 | 1.0 | 0.4864 | 1.0 | 0.99 | 2555 | 20  | 2541 | 9  | 2529 | 2  | 2529 | 2  | 101 |
| 96 | 88  | 200,249   | 1.07 | 5.8083 | 0.3 | 11.7613 | 0.6 | 0.4955 | 0.6 | 0.90 | 2594 | 12  | 2586 | 6  | 2579 | 4  | 2579 | 4  | 101 |
| 49 | 121 | 133,917   | 1.64 | 5.7582 | 0.3 | 10.5161 | 2.0 | 0.4392 | 2.0 | 0.99 | 2347 | 39  | 2481 | 18 | 2593 | 5  | 2593 | 5  | 91  |
| 58 | 158 | 388,765   | 0.61 | 5.7406 | 0.3 | 11.9817 | 6.1 | 0.4989 | 6.1 | 1.00 | 2609 | 131 | 2603 | 57 | 2598 | 5  | 2598 | 5  | 100 |
| 43 | 58  | 129,166   | 0.77 | 5.7353 | 1.2 | 12.3865 | 1.4 | 0.5152 | 0.7 | 0.48 | 2679 | 15  | 2634 | 13 | 2600 | 21 | 2600 | 21 | 103 |
| 40 | 177 | 140,070   | 0.41 | 5.5663 | 0.3 | 12.4816 | 2.0 | 0.5039 | 2.0 | 0.99 | 2630 | 43  | 2641 | 19 | 2650 | 4  | 2650 | 4  | 99  |
| 87 | 99  | 181,053   | 1.23 | 5.5602 | 0.3 | 11.7377 | 4.1 | 0.4733 | 4.1 | 1.00 | 2498 | 84  | 2584 | 38 | 2651 | 5  | 2651 | 5  | 94  |
| 21 | 34  | 58,134    | 0.96 | 5.4638 | 0.7 | 13.1518 | 1.2 | 0.5212 | 1.0 | 0.83 | 2704 | 22  | 2691 | 12 | 2680 | 11 | 2680 | 11 | 101 |
| 63 | 67  | 194,783   | 0.57 | 5.4513 | 0.4 | 12.4434 | 4.9 | 0.4920 | 4.9 | 1.00 | 2579 | 104 | 2638 | 46 | 2684 | 7  | 2684 | 7  | 96  |
| 39 | 62  | 121,555   | 0.64 | 5.4123 | 0.4 | 13.2785 | 1.1 | 0.5212 | 1.0 | 0.93 | 2704 | 22  | 2700 | 10 | 2696 | 6  | 2696 | 6  | 100 |

**Rejected analyses**

|    |    |        |      |         |     |        |     |        |     |      |      |    |      |    |      |    |      |    |     |
|----|----|--------|------|---------|-----|--------|-----|--------|-----|------|------|----|------|----|------|----|------|----|-----|
| 15 | 28 | 28,665 | 0.97 | 12.8429 | 4.2 | 2.1210 | 4.5 | 0.1976 | 1.5 | 0.34 | 1162 | 16 | 1156 | 31 | 1143 | 84 | 1143 | 84 | 102 |
|----|----|--------|------|---------|-----|--------|-----|--------|-----|------|------|----|------|----|------|----|------|----|-----|



|     |     |         |      |        |     |        |     |        |     |      |      |     |      |     |      |    |      |    |    |
|-----|-----|---------|------|--------|-----|--------|-----|--------|-----|------|------|-----|------|-----|------|----|------|----|----|
| 69  | 857 | 2,972   | 0.96 | 9.9072 | 1.1 | 1.5783 | 6.9 | 0.1134 | 6.8 | 0.99 | 693  | 45  | 962  | 43  | 1641 | 20 | 1641 | 20 | 42 |
| 27  | 76  | 24,742  | 1.07 | 9.2737 | 1.0 | 4.0155 | 7.8 | 0.2701 | 7.7 | 0.99 | 1541 | 106 | 1637 | 63  | 1763 | 19 | 1763 | 19 | 87 |
| 100 | 350 | 36,448  | 0.65 | 9.0830 | 1.2 | 4.2437 | 7.4 | 0.2796 | 7.4 | 0.99 | 1589 | 104 | 1683 | 61  | 1801 | 22 | 1801 | 22 | 88 |
| 8   | 159 | 65,465  | 1.53 | 8.9434 | 1.0 | 4.4521 | 16  | 0.2888 | 16  | 1.00 | 1635 | 225 | 1722 | 130 | 1829 | 18 | 1829 | 18 | 89 |
| 20  | 325 | 7,337   | 0.97 | 8.8976 | 0.5 | 3.6437 | 2.5 | 0.2351 | 2.4 | 0.98 | 1361 | 30  | 1559 | 20  | 1838 | 8  | 1838 | 8  | 74 |
| 41  | 31  | 6,601   | 0.95 | 8.8523 | 2.7 | 3.2895 | 5.3 | 0.2112 | 4.5 | 0.86 | 1235 | 51  | 1479 | 41  | 1848 | 48 | 1848 | 48 | 67 |
| 38  | 36  | 12,468  | 2.43 | 8.5908 | 1.2 | 4.5130 | 12  | 0.2812 | 12  | 0.99 | 1597 | 173 | 1733 | 102 | 1902 | 22 | 1902 | 22 | 84 |
| 47  | 52  | 97,730  | 0.57 | 8.5640 | 1.1 | 4.7835 | 3.5 | 0.2971 | 3.3 | 0.95 | 1677 | 49  | 1782 | 29  | 1907 | 19 | 1907 | 19 | 88 |
| 36  | 186 | 59,383  | 0.25 | 8.2210 | 0.1 | 5.1240 | 1.7 | 0.3055 | 1.7 | 1.00 | 1719 | 26  | 1840 | 15  | 1980 | 2  | 1980 | 2  | 87 |
| 60  | 162 | 11,475  | 1.56 | 8.2172 | 3.2 | 3.7508 | 12  | 0.2235 | 11  | 0.96 | 1301 | 131 | 1582 | 93  | 1981 | 57 | 1981 | 57 | 66 |
| 3   | 618 | 4,998   | 0.40 | 8.0383 | 1.4 | 2.6607 | 12  | 0.1551 | 12  | 0.99 | 930  | 100 | 1318 | 86  | 2020 | 25 | 2020 | 25 | 46 |
| 84  | 208 | 8,634   | 1.06 | 7.1074 | 2.4 | 6.9983 | 12  | 0.3607 | 12  | 0.98 | 1986 | 204 | 2111 | 109 | 2236 | 41 | 2236 | 41 | 89 |
| 44  | 50  | 44,433  | 0.66 | 7.0699 | 2.2 | 5.8101 | 18  | 0.2979 | 17  | 0.99 | 1681 | 258 | 1948 | 153 | 2245 | 38 | 2245 | 38 | 75 |
| 42  | 278 | 187,833 | 0.35 | 6.9824 | 0.2 | 7.3169 | 1.3 | 0.3705 | 1.3 | 0.99 | 2032 | 23  | 2151 | 12  | 2266 | 3  | 2266 | 3  | 90 |
| 19  | 224 | 63,968  | 0.60 | 6.9745 | 0.2 | 6.9678 | 5.8 | 0.3525 | 5.8 | 1.00 | 1946 | 98  | 2107 | 52  | 2268 | 4  | 2268 | 4  | 86 |
| 5   | 282 | 44,155  | 0.52 | 6.9716 | 0.3 | 6.0513 | 6.5 | 0.3060 | 6.5 | 1.00 | 1721 | 98  | 1983 | 56  | 2269 | 5  | 2269 | 5  | 76 |
| 55  | 160 | 83,249  | 1.42 | 6.8125 | 0.3 | 7.6474 | 2.8 | 0.3779 | 2.8 | 0.99 | 2066 | 49  | 2190 | 25  | 2309 | 6  | 2309 | 6  | 89 |
| 6   | 265 | 53,898  | 0.95 | 6.5794 | 1.0 | 6.4446 | 28  | 0.3075 | 28  | 1.00 | 1729 | 419 | 2038 | 247 | 2368 | 17 | 2368 | 17 | 73 |
| 94  | 435 | 18,995  | 0.49 | 6.3268 | 0.7 | 4.4824 | 2.7 | 0.2057 | 2.6 | 0.96 | 1206 | 28  | 1728 | 22  | 2435 | 12 | 2435 | 12 | 50 |

**Notes:**

1. Best age is determined from 207Pb/206Pb age for analyses with 206Pb/238U age > 1000 Ma.
2. Concordance is based on 206Pb/238U age / 206Pb/207Pb age. .
3. Analyses with >10% discordance, >5% reverse discordance, or >10% uncertainty (2-sigma) in Best Age are not included in discussion.
4. All uncertainties are reported at the 1-sigma level, and include only measurement errors.
5. Systematic errors are as follows (at 2-sigma level): 1.1% (206Pb/238U) & 1.1 % (207Pb/206Pb)].
6. Analyses conducted by LA-MC-ICPMS, as described by Gehrels et al. (2008).
7. U concentration and U/Th are calibrated relative to Sri Lanka zircon standard and are accurate to ~20%.
8. Common Pb correction is from measured 204Pb with common Pb composition interpreted from Stacey and Kramers (1975).
9. Common Pb composition assigned uncertainties of 1.5 for 206Pb/204Pb, 0.3 for 207Pb/204Pb, and 2.0 for 208Pb/204Pb.
10. U/Pb and 207Pb/206Pb fractionation is calibrated relative to fragments of a large Sri Lanka zircon of  $563.5 \pm 3.2$  Ma (2-sigma).
11. U decay constants and composition as follows:  $^{238}\text{U} = 9.8485 \times 10^{-10}$ ,  $^{235}\text{U} = 1.55125 \times 10^{-10}$ ,  $^{238}\text{U}/^{235}\text{U} = 137.88$ .
